# Supplementary material for: Resveratrol and Clinical Trials: The Crossroad from In Vitro Studies to Human Evidence
Source: PubMed Central journal article supplement — Curr Pharm Des. 2013 Sep 3;19(34):6064–93. doi: 10.2174/13816128113199990407 (PMC3782695; doi:10.2174/13816128113199990407), 2013-09-03
Supplement: SD1.pdf [file SD1.pdf]

## SUPPLEMENTARY TABLES

Resveratrol and Clinical Trials: The Crossroad from *In Vitro* Studies to Human Evidence

Joao Tomé-Carneiro, Mar Larrosa, Antonio González-Sarriás, Francisco A. Tomás-Barberán, María Teresa García-Conesa and Juan Carlos Espín\*

Research Group on Quality, Safety and Bioactivity of Plant Foods, Department of Food Science and Technology, CEBAS-CSIC, 30100 Campus de Espinardo, Murcia, Spain

**IN VITRO ASSAYS:**

**Supplementary Table 1.** Effects of resveratrol and related mechanisms on human cancer cells.

**Supplementary Table 2.** Neuroprotective effects of resveratrol in *in vitro* models.

**Supplementary Table 3.** Effects of resveratrol on human cells involved in the vascular milieu.

**Supplementary Table 4.** Anti-aging effects of resveratrol in *in vitro* models.

**ANIMAL MODEL ASSAYS:**

**Supplementary Table 5.** Cancer chemopreventive effects of resveratrol and related mechanisms in animal models.

**Supplementary Table 6.** Effects of exposure to resveratrol on animal models of cardiovascular disease.

**Supplementary Table 7.** Resveratrol-exposure effects on insulin, glucose and lipid levels of animal models of obesity, diabetes and metabolic dysfunction.

**Supplementary Table 8.** Anti-inflammatory targets and related mechanisms dealing with resveratrol in animal models.

**Supplementary Table 9.** Neuroprotective effects of resveratrol in animal models.

**Supplementary Table 10.** Anti-aging effects of resveratrol in animal models.

**REGISTERED HUMAN TRIALS**

**Supplementary Table 11.** Human trials dealing with resveratrol registered at clinicaltrials.gov.

**Supplementary Table 1. Effects of resveratrol and related mechanisms on human cancer cells.**

| Cancer Model        | Human Cell Line                             | Treatment                                      | Effects and Mechanisms                                                                                                                                                                                                          | Reference                                                                                             |
|---------------------|---------------------------------------------|------------------------------------------------|---------------------------------------------------------------------------------------------------------------------------------------------------------------------------------------------------------------------------------|-------------------------------------------------------------------------------------------------------|
| Colon               | HT-29                                       | 100-150 $\mu$ M / 24-72h                       | $\uparrow$ apoptosis; G <sub>0</sub> /G <sub>1</sub> cell cycle arrest; $\downarrow$ PPP; $\downarrow$ cyclin-D1                                                                                                                | [1]                                                                                                   |
|                     |                                             | 100-150 $\mu$ M / 24-72h                       | $\uparrow$ apoptosis; G <sub>0</sub> /G <sub>1</sub> cell cycle arrest; $\downarrow$ Wnt pathway; $\uparrow$ p27                                                                                                                | [2]                                                                                                   |
|                     |                                             | IC <sub>50</sub> =78.9 $\mu$ M / 24h           | $\downarrow$ cell proliferation                                                                                                                                                                                                 | [3]                                                                                                   |
|                     |                                             | IC <sub>50</sub> =276 $\mu$ M / 24h            | $\uparrow$ apoptosis; $\uparrow$ caspase 3                                                                                                                                                                                      | [4]                                                                                                   |
|                     |                                             | 50-400 $\mu$ M / 24h                           | $\uparrow$ apoptosis; $\uparrow$ AMPK                                                                                                                                                                                           | [5]                                                                                                   |
|                     | RK2                                         | 2.5-40 $\mu$ M / 48h                           | $\downarrow$ cell proliferation; $\downarrow$ Wnt pathway                                                                                                                                                                       | [6]                                                                                                   |
|                     |                                             | Caco-2                                         | 10-50 $\mu$ M / 24-48h                                                                                                                                                                                                          | $\downarrow$ cell proliferation; S and G <sub>2</sub> /M cell cycle arrest; $\downarrow$ ODC activity |
|                     | Caco-2, HCT-116                             | 50-200 $\mu$ M / 24-48h                        | $\downarrow$ cell proliferation; S and G <sub>2</sub> /M cell cycle arrest; $\downarrow$ cyclin-D1, cdk4; $\uparrow$ cyclin-E,-A; $\uparrow$ apoptosis; $\uparrow$ caspase 3                                                    | [8]                                                                                                   |
|                     |                                             | 30-200 $\mu$ M / 24-72h                        | $\downarrow$ cell proliferation; $\uparrow$ p38 $\uparrow$ sirt1; $\uparrow$ PPAR $\gamma$ coactivator PGC-1 $\alpha$                                                                                                           | [9]                                                                                                   |
|                     | HCT-116                                     | 10-100 $\mu$ M / 24-72h                        | $\uparrow$ apoptosis; $\uparrow$ caspase 2, 8                                                                                                                                                                                   | [10]                                                                                                  |
| SW480, SW620, HT-29 | IC <sub>50</sub> $\approx$ 30 $\mu$ M / 48h | $\uparrow$ apoptosis; $\uparrow$ ERK, JNK, Akt | [11]                                                                                                                                                                                                                            |                                                                                                       |
| DLD1                | 100 $\mu$ M / 48h                           | $\uparrow$ apoptosis; $\uparrow$ caspase 3     | [12]                                                                                                                                                                                                                            |                                                                                                       |
| Prostate            | LNCaP, PC-3                                 | 1-150 $\mu$ M / 12-72h                         | $\downarrow$ cell proliferation; $\uparrow$ apoptosis; $\uparrow$ caspase 3, 9; change in the ratio of Bax/Bcl-2; G <sub>0</sub> /G <sub>1</sub> cell cycle arrest; $\downarrow$ cyclin-B, cdk1, cyclin-B/cdk1 kinase activity; | [13]                                                                                                  |

|                    |                                                      |                                                                                                                                   |                                                                                                                                                                                             |                                                                                                                                                                                                     |
|--------------------|------------------------------------------------------|-----------------------------------------------------------------------------------------------------------------------------------|---------------------------------------------------------------------------------------------------------------------------------------------------------------------------------------------|-----------------------------------------------------------------------------------------------------------------------------------------------------------------------------------------------------|
|                    |                                                      |                                                                                                                                   | ↓cyclin-D1, -E, cdk 4, cyclin-D1/cdk4 kinase activity; ↑p53, p21, and p27 (only LNCaP cells)                                                                                                |                                                                                                                                                                                                     |
|                    | LNCaP                                                | 1-50 μM / 24h                                                                                                                     | ↓cell proliferation; ↑apoptosis; ↑caspase 3, 9; change in the ratio of Bax/Bcl-2; G <sub>0</sub> /G <sub>1</sub> cell cycle arrest; ↓PI3K, p-Akt, Bcl-2; ↑Bax, Bak, Bid, and Bad            | [14]                                                                                                                                                                                                |
|                    | LNCaP, DU145                                         | 1-100 μM / 24-72h                                                                                                                 | ↑apoptosis; ↓MTA1/NuRD; ↑p53, p21, Bax                                                                                                                                                      | [15]                                                                                                                                                                                                |
|                    | LNCaP                                                | 1- 25 μM / 24-72h                                                                                                                 | G <sub>0</sub> /G <sub>1</sub> cell cycle arrest; ↑cdk inhibitor 1A and B                                                                                                                   | [16]                                                                                                                                                                                                |
|                    | PC-3 cells                                           | 1-50 μM / 24h                                                                                                                     | ↑XRT-induced apoptosis and proliferation inhibition; ↑p15, p21, p53; ↓cyclin-B, -D and cdk2; ↑p-H2A.X                                                                                       | [17]                                                                                                                                                                                                |
|                    | PC3, CWR22rv1                                        | 2.5-10 μM / 7-10 days                                                                                                             | ↑IR-induced apoptosis and proliferation inhibition; G <sub>0</sub> /G <sub>1</sub> and S cell cycle arrest; ↑p27, p21, p53; ↓caspase 3; ↓p-Akt                                              | [18]                                                                                                                                                                                                |
|                    | LNCaP                                                | 1-50 μM / 24-72h                                                                                                                  | ↑p53R2, p21; ↓PSA expression                                                                                                                                                                | [19]                                                                                                                                                                                                |
|                    |                                                      | 20 μM / 1-48h                                                                                                                     | ↑apoptosis; ↓p-PI3K, p-Akt and mTOR; ↓p-FOXO; ↑Bim, TRAIL, p27/KIP1, DR4 and DR5; ↓cyclin-D1                                                                                                | [20]                                                                                                                                                                                                |
|                    | LNCaP, DU-145, CWR22rv1                              | 1–50 μM / 1-5 days                                                                                                                | ↓cell proliferation; ↓PTEN; ↑AR; ↓EGFR; ↓PI3K/Akt                                                                                                                                           | [21]                                                                                                                                                                                                |
| Liver              | HepG2                                                | 10 <sup>-6</sup> -1 μM / 6 days                                                                                                   | ↓cell proliferation; G <sub>0</sub> /G <sub>1</sub> and G <sub>2</sub> /M cell cycle arrest; ↑apoptosis; ↓ROS; ↑iNOS                                                                        | [22]                                                                                                                                                                                                |
|                    |                                                      | 50, 100 μM / 24h                                                                                                                  |                                                                                                                                                                                             | [23]                                                                                                                                                                                                |
|                    |                                                      | 1-100 μM / 24-72h                                                                                                                 | ↓cell invasion; ↓MMP-9, NF-κB                                                                                                                                                               | [24]                                                                                                                                                                                                |
|                    |                                                      | 10-300 μM / 24h                                                                                                                   | ↓cell proliferation; ↑NADPH; ↑iNOS                                                                                                                                                          | [25]                                                                                                                                                                                                |
|                    |                                                      | 2.5-320 μM / 1-48h                                                                                                                | ↓cell proliferation; G <sub>0</sub> /G <sub>1</sub> cell cycle arrest; ↓Cyclin-D1; ↓p-p38, Akt, Pak1; ↑p-ERK                                                                                | [26]                                                                                                                                                                                                |
|                    |                                                      | Huh-7                                                                                                                             | IC <sub>50</sub> =22.4 μM                                                                                                                                                                   | ↓cell proliferation; G <sub>0</sub> /G <sub>1</sub> cell cycle arrest; ↓cyclin -A, -E and cdk 2; ↑apoptosis; ↑p53, p21/WAF1; ↓p-ERK, p-p38; ↑autophagy-related Atg5, Atg7, Atg9, and Atg12 proteins |
|                    | SK-HEP-1                                             | 50-250 μM / 24-48h                                                                                                                | ↓cell proliferation; ↑apoptosis/caspase 3; ↓ROS                                                                                                                                             | [28]                                                                                                                                                                                                |
|                    | HepG2, Hep3B                                         | 1–100 μM / 24-48h                                                                                                                 | ↓cell proliferation; ↑TIMP-1, -2; ↓MMP-2, -9                                                                                                                                                | [29]                                                                                                                                                                                                |
|                    |                                                      | 10, 20 μM / 24-48h                                                                                                                | ↓cell proliferation; G <sub>0</sub> /G <sub>1</sub> cell cycle arrest; ↑apoptosis; ↑p21, Bax, p53                                                                                           | [30]                                                                                                                                                                                                |
| Breast             | MCF-7, MDA-MB-231                                    | 10-200 μM / 12-60h                                                                                                                | ↓cell proliferation; G <sub>0</sub> /G <sub>1</sub> cell (MDA-MB-231) and S (MCF-7) cycle arrest; ↑apoptosis (MCF-7); ↑p21, p27, p53                                                        | [31]                                                                                                                                                                                                |
|                    |                                                      | 1-100 μM / 48h                                                                                                                    |                                                                                                                                                                                             | [32]                                                                                                                                                                                                |
|                    |                                                      | 1-50 μM / 48h                                                                                                                     | ↓cell proliferation; ↑apoptosis; ↑Bax, p21                                                                                                                                                  | [33]                                                                                                                                                                                                |
|                    |                                                      | 1-50 μM / 72h                                                                                                                     | ↓cell proliferation; ↓PI3K/Akt pathway; ↓mTOR/p70S6K pathway; ↓rapamycin-induced Akt activation                                                                                             | [34]                                                                                                                                                                                                |
|                    |                                                      | IC <sub>50</sub> =120, 370 μM / 24h, respectively                                                                                 | ↓colonies formation; G <sub>0</sub> /G <sub>1</sub> cell cycle arrest (MDA-MB-231); S and G <sub>2</sub> /M cell cycle arrest (in MCF-7); ↓cyclin-B,-D1; ↓Rb, E2F; ↑p53, p21; ↑p-ERK, p-p38 | [35]                                                                                                                                                                                                |
|                    |                                                      |                                                                                                                                   | ↑melphalan-induced cytotoxic and apoptosis; ↑p53, caspase 7, 9, p-Chk2; ↓procaspase 8; S cell cycle arrest; ↓cyclin-A, p-CDK2                                                               |                                                                                                                                                                                                     |
|                    | MCF-7                                                | 10, 50 μM / 2-6 days                                                                                                              | ↓cell proliferation; ↓TNFα-induced NF-κB activation                                                                                                                                         | [36]                                                                                                                                                                                                |
|                    |                                                      | 1-150 μM / 36h                                                                                                                    | ↑apoptosis; ↓Bcl-2; ↑TROS, NO; ↓NF-κB; ↓MMP-9; ↓activity and cell migration                                                                                                                 | [37]                                                                                                                                                                                                |
|                    |                                                      | 5- 40 μM / 24-72h                                                                                                                 |                                                                                                                                                                                             | [38]                                                                                                                                                                                                |
|                    |                                                      | 5-20 μM / 90 min                                                                                                                  | ↓cell proliferation; S cell cycle arrest; ↑apoptosis; ↓telomerase activity                                                                                                                  | [39]                                                                                                                                                                                                |
| 16-64 μM / 24-72h  |                                                      | ↑accumulation of DNA strand; ↑AhR; ↓BRCA-1                                                                                        | [40]                                                                                                                                                                                        |                                                                                                                                                                                                     |
| 25 μM / 24h        |                                                      | ↓cell proliferation; ↓colonies formation; ↑apoptosis; ↑caspase 3; ↓p-Akt/PKB and mTOR                                             | [41]                                                                                                                                                                                        |                                                                                                                                                                                                     |
| 50-100 μM / 24-48h | ↓EGF-induced epithelial mesenchymal transition (EMT) | [42]                                                                                                                              |                                                                                                                                                                                             |                                                                                                                                                                                                     |
|                    |                                                      | ↓cell proliferation; G <sub>0</sub> /G <sub>1</sub> cell cycle arrest (MCF-7); ↑apoptosis; ↑NHE-1 and NHE-3; ↑uptake of NaCl; ↓pH |                                                                                                                                                                                             |                                                                                                                                                                                                     |

|                   |                                               |                                                   |                                                                                                                                                                                                                                                                                                                                                                                                                                              |              |
|-------------------|-----------------------------------------------|---------------------------------------------------|----------------------------------------------------------------------------------------------------------------------------------------------------------------------------------------------------------------------------------------------------------------------------------------------------------------------------------------------------------------------------------------------------------------------------------------------|--------------|
|                   | MCF-7,<br>MDA-MB-231,<br>MDA-MB-468           | 10 $\mu$ M / 1-7 days                             | $\downarrow$ growth tumors; $\downarrow$ STAT-3 acetylation                                                                                                                                                                                                                                                                                                                                                                                  | [43]         |
|                   | MDA-MB-231                                    | 5–50 $\mu$ M / 12h                                | $\downarrow$ EGF-induced migration; $\downarrow$ MED28, MMP-9; $\downarrow$ EGFR/PI3K; $\downarrow$ NF- $\kappa$ B activity                                                                                                                                                                                                                                                                                                                  | [44]         |
| Leukemia-Lymphoma | K562                                          | 40 $\mu$ M / 1-12h                                | $\uparrow$ apoptosis; $\downarrow$ p-Akt; $\downarrow$ PI3K/Akt activity; $\uparrow$ ERK1/2 activity                                                                                                                                                                                                                                                                                                                                         | [45]         |
|                   | K562/IMA-3,<br>K562                           | 1-100 $\mu$ M / 24h<br>50 $\mu$ M / 48h           | $\downarrow$ cell proliferation; G <sub>0</sub> /G <sub>1</sub> cell cycle arrest; $\uparrow$ apoptosis; $\uparrow$ UPR markers<br>$\uparrow$ autophagy; $\uparrow$ JNK-p62, AMPK; $\downarrow$ mTOR pathway                                                                                                                                                                                                                                 | [46]<br>[47] |
|                   | K562, U937,<br>KCL22, HL-60, THP1,<br>WSU-CLL | 1-100 $\mu$ M / 24h<br>1-100 $\mu$ M / 72h        | $\downarrow$ cell proliferation; $\uparrow$ apoptosis; $\uparrow$ caspase 3<br>$\downarrow$ cell proliferation; G <sub>2</sub> /M and S cell cycle arrest; $\uparrow$ cyclins-A, -B; $\uparrow$ apoptosis; $\uparrow$ caspases activity; $\downarrow$ colonies formation                                                                                                                                                                     | [48]<br>[49] |
|                   | HL-60                                         | 2.5-320 $\mu$ M / 1-48h<br>1-200 $\mu$ M / 24-48h | $\downarrow$ cell proliferation; G <sub>0</sub> /G <sub>1</sub> and S cell cycle arrest; $\uparrow$ apoptosis<br>$\downarrow$ cell proliferation; G <sub>0</sub> /G <sub>1</sub> cell cycle arrest; $\uparrow$ apoptosis; $\downarrow$ Bcl-2; $\uparrow$ caspase 3; $\uparrow$ Bax, Annexin A1; $\uparrow$ DNA damage                                                                                                                        | [36]<br>[50] |
|                   | OCI-LY8<br>OCI-LY8,<br>OCI-LY1                | 25 $\mu$ M / 24h<br>25, 50 $\mu$ M / 24h          | $\downarrow$ cell proliferation; G <sub>0</sub> /G <sub>1</sub> cell cycle arrest; $\uparrow$ apoptosis; $\downarrow$ Bcl-6; $\uparrow$ p27, p53 and CD69; $\downarrow$ c-myc<br>$\downarrow$ cell proliferation; G <sub>0</sub> /G <sub>1</sub> cell cycle arrest; $\uparrow$ apoptosis; $\downarrow$ p-Akt, p-p70 S6K, S6 and FOXO; $\downarrow$ PI3K; $\downarrow$ glucose metabolism                                                     | [51]<br>[52] |
|                   | AML-2                                         | 1-100 $\mu$ M / 24-72h                            | $\downarrow$ cell proliferation; $\uparrow$ apoptosis; $\downarrow$ MRP1                                                                                                                                                                                                                                                                                                                                                                     | [53]         |
|                   | U937,<br>MV-4-11                              | 25-50 $\mu$ M / 24-48h                            | $\uparrow$ vorinostat and LBH-589-induced cytotoxicity; $\uparrow$ apoptosis; $\uparrow$ DNA damage; $\uparrow$ DR5, caspase-8; $\uparrow$ ROS                                                                                                                                                                                                                                                                                               | [54]         |
| Melanoma          | B16/DOX<br>B16F10,<br>B16BL6                  | 1-500 $\mu$ M / 24-72h<br>100 $\mu$ M / 4-24h     | $\downarrow$ cell proliferation; G <sub>0</sub> /G <sub>1</sub> cell cycle arrest; $\uparrow$ apoptosis; $\downarrow$ cyclin-D1/cdk4; $\uparrow$ p53<br>$\downarrow$ cell migratory and invasion; $\downarrow$ Akt                                                                                                                                                                                                                           | [55]<br>[56] |
|                   | DM443,<br>DM738                               | 1-100 $\mu$ M / 1-4 days                          | $\downarrow$ cell proliferation; $\uparrow$ TMZ-induced cytotoxicity                                                                                                                                                                                                                                                                                                                                                                         | [57]         |
| Myeloma           | RPMI8226,<br>OPM-2                            | 1-100 $\mu$ M / 1-3 days                          | $\downarrow$ cell proliferation; $\uparrow$ apoptosis; $\downarrow$ NF- $\kappa$ B                                                                                                                                                                                                                                                                                                                                                           | [58]         |
|                   | U266,<br>RPMI8226,<br>MM.1R                   | 50 $\mu$ M / 1-6 days                             | $\downarrow$ cell proliferation; $\uparrow$ apoptosis; $\uparrow$ bortezomib and thalidomide-induced cytotoxicity; G <sub>0</sub> /G <sub>1</sub> cell cycle arrest; $\downarrow$ cyclin-D1, cIAP-2, XIAP, survivin, Bcl-2, Bcl-xL, Bfl-1/A1, and TRAF2; $\uparrow$ Bax, caspase 3; $\downarrow$ NF- $\kappa$ B; $\downarrow$ I $\kappa$ B $\alpha$ kinase; $\uparrow$ p-I $\kappa$ B $\alpha$ , p-p65; $\downarrow$ IL-6; $\uparrow$ STAT-3 | [59]         |
| Glioma            | U251                                          | 25 $\mu$ M / 1-15 days<br>1-100 $\mu$ M / 24-48h  | $\downarrow$ cell proliferation; $\downarrow$ cell migration; $\downarrow$ p-Akt; $\downarrow$ cyclin-D1/caspase 3; $\downarrow$ colonies formation<br>$\downarrow$ cell proliferation; $\downarrow$ SULTs                                                                                                                                                                                                                                   | [60]<br>[61] |
|                   | U-87MG                                        | 20–80 $\mu$ M / 48h<br>10–200 $\mu$ M / 24-96h    | $\downarrow$ cell proliferation; S cell cycle arrest<br>$\downarrow$ cell proliferation; S cell cycle arrest; $\uparrow$ Bax; $\downarrow$ cell migration and invasion                                                                                                                                                                                                                                                                       | [62]<br>[63] |
|                   | U-87MG,<br>GBM8401,<br>GBM-SKH                | 30 $\mu$ M / 24-48h<br>1-20 $\mu$ M / 1h          | $\downarrow$ cell proliferation; $\uparrow$ apoptosis; $\uparrow$ autophagy; S and G <sub>2</sub> /M cell cycle arrest; $\uparrow$ Atg5, beclin-1 and LC3-II; $\uparrow$ Bax, Caspase 3; $\uparrow$ pCdc2(Y15), cyclin-A, -E, -B, and Rb; $\downarrow$ cyclin-D1<br>$\downarrow$ cell proliferation; $\uparrow$ TMZ-induced cytotoxicity                                                                                                     | [64]<br>[65] |
|                   | T24                                           | 1–200 $\mu$ M / 24h<br>50–100 $\mu$ M / 24-48h    | $\downarrow$ cell proliferation; G <sub>0</sub> /G <sub>1</sub> cell cycle arrest; $\uparrow$ apoptosis; $\uparrow$ p21; $\downarrow$ p-Akt, p-Rb; $\downarrow$ cyclin-D1, cdk4; $\uparrow$ p-p38; $\downarrow$ VEGF, FGF-2<br>$\downarrow$ cell proliferation; $\uparrow$ apoptosis; $\uparrow$ ROS; $\uparrow$ caspase 3, 9; $\downarrow$ ATP; $\uparrow$ Cyt-c                                                                            | [66]<br>[67] |
|                   | Bladder                                       |                                                   |                                                                                                                                                                                                                                                                                                                                                                                                                                              |              |

|                  |                                               |                          |                                                                                                                                             |      |
|------------------|-----------------------------------------------|--------------------------|---------------------------------------------------------------------------------------------------------------------------------------------|------|
|                  | ECV304                                        | 1-100 $\mu$ M / 24-48h   | $\uparrow$ apoptosis; $\uparrow$ Bad/Bcl-2 ratio; $\uparrow$ NO; $\downarrow$ oxidative damage; $\downarrow$ neutrophils activation         | [68] |
| Medullo-blastoma | UW228-3                                       | 100 $\mu$ M / 1-48h      | $\downarrow$ cell proliferation; G <sub>0</sub> /G <sub>1</sub> cell cycle arrest; $\uparrow$ apoptosis; $\downarrow$ SULTs                 | [69] |
|                  | UW228-3,                                      | 100 $\mu$ M / 1-48h      | $\uparrow$ apoptosis; $\downarrow$ NF- $\kappa$ B, Bcl-2; $\downarrow$ I $\kappa$ B $\alpha$                                                | [70] |
|                  | UW228-2                                       | 100 $\mu$ M / 1-48h      | $\downarrow$ cell proliferation; S cell cycle arrest; $\downarrow$ c-myc; $\uparrow$ apoptosis                                              | [71] |
| Endometrial      | HEC1B                                         | 1-100 $\mu$ M / 24-48h   | $\downarrow$ cell proliferation; $\uparrow$ apoptosis; $\uparrow$ beta-arrestin 2; $\uparrow$ caspase 3; $\downarrow$ Akt/GSK3 $\beta$      | [72] |
| Gastric          | SGC7901                                       | 50-200 $\mu$ M / 48h     | $\downarrow$ cell proliferation; $\uparrow$ apoptosis; $\uparrow$ ROS; $\uparrow$ DNA damage                                                | [73] |
|                  | AGS                                           | 500 nM / 1-24h           | $\downarrow$ H <sub>2</sub> O <sub>2</sub> -induced cell proliferation; $\downarrow$ MEK1/2-ERK1/2-c-Jun                                    | [74] |
|                  | HGC-27                                        | 50 $\mu$ M / 24h         | $\uparrow$ apoptosis; $\uparrow$ autophagy; $\downarrow$ dihydroceramide desaturase                                                         | [75] |
| Thyroid          | MTC                                           | 1-100 $\mu$ M / 4-6 days | $\downarrow$ cell proliferation; $\uparrow$ apoptosis; $\uparrow$ Notch2; $\uparrow$ caspase 3, PARP; $\downarrow$ ASCL1, CgA               | [76] |
|                  | BHP 2-7,<br>BHP 18-21,<br>FTC 236, FTC<br>238 | 0.1-100 $\mu$ M / 4-24h  | $\downarrow$ cell proliferation; $\uparrow$ apoptosis; $\uparrow$ p-ERK1/2; $\uparrow$ p-p53, c-fos, c-jun, p21;<br>$\downarrow$ ASCL1, CgA | [77] |
| Osteo-sarcoma    | HOS, MG-63<br>Saos-2, U-2<br>OS,              | 1-100 $\mu$ M / 3-7 days | $\downarrow$ cell proliferation; $\uparrow$ apoptosis                                                                                       | [78] |
|                  | SJSA1                                         | 1-100 $\mu$ M / 1-3 days | $\downarrow$ cell proliferation; $\uparrow$ apoptosis; $\uparrow$ p-ERK1/2; $\uparrow$ p-p53, c-fos, c-jun, p21;<br>$\downarrow$ ASCL1, CgA | [79] |
| Retino-blastoma  | Y79                                           | 1-100 $\mu$ M / 24-96h   | $\downarrow$ cell proliferation; S cell cycle arrest; $\downarrow$ Membrane Mitochondrial Potential;<br>$\uparrow$ Cyt-c, caspase 3, 9      | [80] |

PPP, pentose phosphate pathway; cdk, cyclin-dependent kinase; IC50, half maximal inhibitory concentration; AMPK, adenosine monophosphate activated protein kinase; ODC, ornithine decarboxylase; PPAR $\gamma$ , coactivator 1 proliferator-activated receptor-gamma; p53, tumour protein 53; p21Waf1/Cip1, cyclin-dependent kinase inhibitor 1A; p27, cyclin dependant kinase inhibitor 2; E2F,transcription factor E2F; Rb, retinoblastoma tumour suppressor gene; ERK, extracellular signal regulated kinase; JNK-1, c-Jun N-terminal kinases; MEK1/2, mitogen-activated protein kinase kinase 1/2; Akt, serine/threonine protein kinase; PI3K, phosphoinositide 3 kinases; FOXO, forkhead transcription factor; TRAIL, TNF-related apoptosis inducing ligand; DR4/5, tumour necrosis factor receptor superfamily,member 10a/10b; PTEN, phosphatase and tensin homolog; AR, androgen receptor; EGFR, endothelial growth factor receptor; ROS, reactive oxygen species; iNOS, inducible nitric oxide synthase; MRP1, motility-related protein 1; NO, nitric oxide; MMP, matrix metalloproteinase; NF $\kappa$ B, nuclear factor kappa B; I $\kappa$ B $\alpha$ , nuclear factor of kappa light polypeptide gene enhancer in B-cells inhibitor alpha; TNF $\alpha$ , tumour necrosis factor alpha; STAT-3, signal transducer and activator of transcription 3; Bcl-2, B-cell lymphoma 2; Sirt1, sirtuin 1; mTOR, mammalian target of rapamycin; MTA1, Metastasis-associated protein MTA1; XRT, X-ray telescope; IR, Ionizing radiation; Atg, autophagy proteins; NADPH, nicotinamide adenine dinucleotide phosphate; TIMP, tissue inhibitors of metalloproteinases; ASPP1, Apoptosis-stimulating of p53 protein 1; cIAPs, inhibitor of apoptosis proteins; MED28, mediator of RNA polymerase II transcription subunit 28; AhR, Aryl hydrocarbon receptor; BRCA-1, breast cancer type 1 protein; NHE, sodium-hydrogen exchanger protein; ATP, Adenosine triphosphate; UPR, unfolded protein response; Cyt-c, cytochrome C; TMZ, temozolomide; SULTs, sulfotransferases. Effect is indicated by  $\downarrow$ : reduction;  $\uparrow$ : induction; p-: phosphorylate status.

#### REFERENCES FOR SUPPLEMENTARY TABLE 1.

- Vanamala J, Radhakrishnan S, Reddivari L, Bhat VB, *et al.* Resveratrol suppresses human colon cancer cell proliferation and induces apoptosis via targeting the pentose phosphate and the talin-FAK signaling pathways-A proteomic approach. *Proteome Sci* 2011; 9: 49.
- Vanamala J, Reddivari L, Radhakrishnan S, Tarver C. Resveratrol suppresses IGF-1 induced human colon cancer cell proliferation and elevates apoptosis via suppression of IGF-1R/Wnt and activation of p53 signaling pathways. *BMC Cancer* 2010; 10: 238.
- Juan ME, Wenzel U, Daniel H, Planas JM. Resveratrol induces apoptosis through ROS-dependent mitochondria pathway in HT-29 human colorectal carcinoma cells. *J Agric Food Chem* 2008; 56: 4813-8.
- Hwang JT, Kwak DW, Lin SK, Kim HM, *et al.* Resveratrol induces apoptosis in chemoresistant cancer cells via modulation of AMPK signaling pathway. *Ann NY Acad Sci* 2007; 1095: 441-8.
- Liang YC, Tsai SH, Chen L, Lin-Shiau SY, *et al.* Resveratrol-induced G2 arrest through the inhibition of CDK7 and p34CDC2 kinases in colon carcinoma HT29 cells. *Biochem Pharmacol* 2003; 65: 1053-60.
- Hope C, Planutis K, Planutiene M, Moyer MP, *et al.* Low concentrations of resveratrol inhibit Wnt signal throughput in colon-derived cells: implications for colon cancer prevention. *Mol Nutr Food Res* 2008; 52: S52-61.
- Schneider Y, Vincent F, Duranton B, Badolo L, *et al.* Antiproliferative effect of resveratrol, a natural component of grapes and wine, on human colonic cancer cells. *Cancer Lett* 2000; 158: 85-91.
- Wolter F, Akoglu B, Clausnitzer A, Stein J. Downregulation of the cyclin D1/Cdk4 complex occurs during resveratrol-induced cell cycle arrest in colon cancer cell lines. *J Nutr* 2001; 131: 2197-203.
- Ulrich S, Loitsch SM, Rau O, von Knethen A, *et al.* Peroxisome proliferator-activated receptor gamma as a molecular target of resveratrol-induced modulation of polyamine metabolism. *Cancer Res* 2006; 66: 7348-54.
- Mohan J, Gandhi AA, Bhavya BC, Rashmi R, *et al.* Caspase-2 triggers Bax-Bak-dependent and -independent cell death in colon cancer cells treated with resveratrol. *J Biol Chem* 2006; 281: 17599-611.
- Colin D, Limagne E, Jeanningros S, Jacquet A, *et al.* Endocytosis of resveratrol via lipid rafts and activation of downstream signaling pathways in cancer cells. *Cancer Prev Res* 2011; 4: 1095-106.
- Trincheri NF, Nicotra G, Follo C, Castino R, *et al.* Resveratrol induces cell death in colorectal cancer cells by a novel pathway involving lysosomal cathepsin D. *Carcinogenesis* 2007; 28: 922-31.
- Benitez DA, Pozo-Guisado E, Alvarez-Barrientos A, Fernandez-Salguero PM, *et al.* Mechanisms involved in resveratrol-induced apoptosis and cell cycle arrest in prostate cancer-derived cell lines. *J Androl* 2007; 28: 282-93.

- [14] Aziz MH, Nihal M, Fu VX, Jarrard DF, *et al.* Resveratrol-caused apoptosis of human prostate carcinoma LNCaP cells is mediated via modulation of phosphatidylinositol 3'-kinase/Akt pathway and Bcl-2 family proteins. *Mol Cancer Ther* 2006; 5: 1335-41.
- [15] Kai L, Samuel SK, Levenson AS. Resveratrol enhances p53 acetylation and apoptosis in prostate cancer by inhibiting MTA1/NuRD complex. *Int J Cancer* 2010; 126: 1538-48.
- [16] Wang TT, Schoene NW, Kim YS, Mizuno CS, *et al.* Differential effects of resveratrol and its naturally occurring methylether analogs on cell cycle and apoptosis in human androgen-responsive LNCaP cancer cells. *Mol Nutr Food Res* 2010; 54: 335-44.
- [17] Fang Y, DeMarco VG, Nicholl MB. Resveratrol enhances radiation sensitivity in prostate cancer by inhibiting cell proliferation and promoting cell senescence and apoptosis. *Cancer Sci* 2012; 103: 1090-8.
- [18] Rashid A, Liu C, Sanli T, Tsiang E, *et al.* Resveratrol enhances prostate cancer cell response to ionizing radiation. Modulation of the AMPK, Akt and mTOR pathways. *Radiat Oncol* 2011; 6: 144.
- [19] Hsieh TC, Huang YC, Wu JM. Control of prostate cell growth, DNA damage and repair and gene expression by resveratrol analogues, *in vitro*. *Carcinogenesis* 2011; 32: 93-101.
- [20] Chen Q, Ganapathy S, Singh KP, Shankar S, *et al.* Resveratrol induces growth arrest and apoptosis through activation of FOXO transcription factors in prostate cancer cells. *PLoS One* 2010; 5: e15288.
- [21] Wang Y, Romigh T, He X, Orloff MS, *et al.* Resveratrol regulates the PTEN/AKT pathway through androgen receptor-dependent and -independent mechanisms in prostate cancer cell lines. *Hum Mol Genet* 2010; 19: 4319-29.
- [22] Notas G, Figli A, Kampa M, Vercauteren J, *et al.* Resveratrol exerts its antiproliferative effect on HepG2 hepatocellular carcinoma cells, by inducing cell cycle arrest, and NOS activation. *Biochim Biophys Acta* 2006; 1760: 1657-66.
- [23] Yu H, Pan C, Zhao S, Wang Z, *et al.* Resveratrol inhibits tumor necrosis factor-alpha-mediated matrix metalloproteinase-9 expression and invasion of human hepatocellular carcinoma cells. *Biomed Pharmacother* 2008; 62: 366-72.
- [24] Colin D, Lancon A, Delmas D, Lizard G, *et al.* Antiproliferative activities of resveratrol and related compounds in human hepatocyte derived HepG2 cells are associated with biochemical cell disturbance revealed by fluorescence analyses. *Biochimie* 2008; 90: 1674-84.
- [25] Parekh P, Motiwale L, Naik N, Rao KV. Downregulation of cyclin D1 is associated with decreased levels of p38 MAP kinases, Akt/PKB and Pak1 during chemopreventive effects of resveratrol in liver cancer cells. *Exp Toxicol Pathol* 2011; 63: 167-73.
- [26] Stervbo U, Vang O, Bonnesen C. Time- and concentration-dependent effects of resveratrol in HL-60 and HepG2 cells. *Cell Prolif* 2006; 39: 479-93.
- [27] Liao PC, Ng LT, Lin LT, Richardson CD, *et al.* Resveratrol arrests cell cycle and induces apoptosis in human hepatocellular carcinoma Huh-7 cells. *J Med Food* 2010; 13: 1415-23.
- [28] Choi HY, Chong SA, Nam MJ. Resveratrol induces apoptosis in human SK-HEP-1 hepatic cancer cells. *Cancer Gen Prot* 2009; 6: 263-8.
- [29] Weng CJ, Wu CF, Huang HW, Wu CH, *et al.* Evaluation of anti-invasion effect of resveratrol and related methoxy analogues on human hepatocarcinoma cells. *J Agric Food Chem* 2010; 58: 2886-94.
- [30] Kuo PL, Chiang LC, Lin CC. Resveratrol-induced apoptosis is mediated by p53-dependent pathway in Hep G2 cells. *Life Sci* 2002; 72: 23-34.
- [31] Pozo-Guisado E, Alvarez-Barrientos A, Mulero-Navarro S, Santiago-Josefat B, *et al.* The antiproliferative activity of resveratrol results in apoptosis in MCF-7 but not in MDA-MB-231 human breast cancer cells: cell-specific alteration of the cell cycle. *Biochem Pharmacol* 2002; 64: 1375-86.
- [32] Shi Y, Yang S, Troup S, Lu X, *et al.* Resveratrol induces apoptosis in breast cancer cells by E2F1-mediated up-regulation of ASP1. *Oncol Rep* 2011; 25: 1713-9.
- [33] He X, Wang Y, Zhu J, Orloff M, *et al.* Resveratrol enhances the anti-tumor activity of the mTOR inhibitor rapamycin in multiple breast cancer cell lines mainly by suppressing rapamycin-induced AKT signaling. *Cancer Lett* 2011; 301: 168-76.
- [34] Hsieh TC, Wong C, John Bennett D, Wu JM. Regulation of p53 and cell proliferation by resveratrol and its derivatives in breast cancer cells: an *in silico* and biochemical approach targeting integrin  $\alpha\beta 3$ . *Int J Cancer* 2011; 129: 2732-43.
- [35] Casanova F, Quarti J, da Costa DC, Ramos CA, *et al.* Resveratrol chemosensitizes breast cancer cells to melphalan by cell cycle arrest. *J Cell Biochem* 2012; 113: 2586-96.
- [36] Banerjee S, Bueso-Ramos C, Aggarwal BB. Suppression of 7,12-dimethylbenz(a)anthracene-induced mammary carcinogenesis in rats by resveratrol: role of nuclear factor-kappaB, cyclooxygenase 2, and matrix metalloproteinase 9. *Cancer Res* 2002; 62: 4945-54.
- [37] Pozo-Guisado E, Merino JM, Mulero-Navarro S, Lorenzo-Benayas MJ, *et al.* Resveratrol-induced apoptosis in MCF-7 human breast cancer cells involves a caspase-independent mechanism with downregulation of Bcl-2 and NF-kappaB. *Int J Cancer* 2005; 115: 74-84.
- [38] Lanzilli G, Fuggetta MP, Tricarico M, Cottarelli A, *et al.* Resveratrol down-regulates the growth and telomerase activity of breast cancer cells *in vitro*. *Int J Oncol* 2006; 28: 641-8.
- [39] Papoutsis AJ, Lamore SD, Wondrak GT, Selmin OI, *et al.* Resveratrol prevents epigenetic silencing of BRCA-1 by the aromatic hydrocarbon receptor in human breast cancer cells. *J Nutr* 2010; 140: 1607-14.
- [40] Scarlatti F, Maffei R, Beau I, Codogno P, *et al.* Role of non-canonical Beclin 1-independent autophagy in cell death induced by resveratrol in human breast cancer cells. *Cell Death Differ* 2008; 15: 1318-29.
- [41] Vergara D, Valente CM, Tinelli A, Siciliano C, *et al.* Resveratrol inhibits the epidermal growth factor-induced epithelial mesenchymal transition in MCF-7 cells. *Cancer Lett* 2011; 310: 1-8.
- [42] Mehdawi H, Alkhalaf M, Khan I. Role of Na<sup>+</sup>/H<sup>+</sup> exchanger in resveratrol-induced growth inhibition of human breast cancer cells. *Med Oncol* 2012; 29: 25-32.
- [43] Lee MF, Pan MH, Chiou YS, Cheng AC, *et al.* Resveratrol modulates MED28 (Magicin/EG-1) expression and inhibits epidermal growth factor (EGF)-induced migration in MDA-MB-231 human breast cancer cells. *J Agric Food Chem* 2011; 59: 11853-61.
- [44] Lee H, Zhang P, Herrmann A, Yang C, *et al.* Acetylated STAT-3 is crucial for methylation of tumor-suppressor gene promoters and inhibition by resveratrol results in demethylation. *Proc Natl Acad Sci* 2012; 109: 7765-9.
- [45] Banerjee Mustafi S, Chakraborty PK, Raha S. Modulation of Akt and ERK1/2 pathways by resveratrol in chronic myelogenous leukemia (CML) cells results in the downregulation of Hsp70. *PLoS One* 2010; 5: e8719.
- [46] Liu BQ, Gao YY, Niu XF, Xie JS, *et al.* Implication of unfolded protein response in resveratrol-induced inhibition of K562 cell proliferation. *Biochem Biophys Res Commun* 2010; 391: 778-2.
- [47] Puissant A, Robert G, Fenouille N, Luciano F, *et al.* Resveratrol promotes autophagic cell death in chronic myelogenous leukemia cells via JNK-mediated p62/SQSTM1 expression and AMPK activation. *Cancer Res* 2010; 70: 1042-52.
- [48] Can G, Cakir Z, Kartal M, Gunduz U, *et al.* Apoptotic effects of resveratrol, a grape polyphenol, on imatinib-sensitive and resistant K562 chronic myeloid leukemia cells. *Anticancer Res* 2012; 32: 2673-8.
- [49] Ferry-Dumazet H, Garnier O, Mamani-Matsuda M, Dupouy M, *et al.* Transresveratrol inhibits the growth and induces the apoptosis of both normal and leukemic hematopoietic cells. *Carcinogenesis* 2002; 23: 1327-33.
- [50] Li G, He S, Chang L, Lu H, *et al.* GADD45a and annexin A1 are involved in the apoptosis of HL-60 induced by resveratrol. *Phytomedicine* 2011; 18: 704-9.
- [51] Faber AC, Chiles TC. Resveratrol induces apoptosis in transformed follicular lymphoma OCI-LY8 cells: evidence for a novel mechanism involving inhibition of BCL6 signaling. *Int J Oncol* 2006; 29: 1561-6.
- [52] Faber AC, Dufort FJ, Blair D, Wagner D, *et al.* Inhibition of phosphatidylinositol 3-kinase-mediated glucose metabolism coincides with resveratrol-induced cell cycle arrest in human diffuse large B-cell lymphomas. *Biochem Pharmacol* 2006; 72: 1246-56.

- [53] Kweon SH, Song JH, Kim TS. Resveratrol-mediated reversal of doxorubicin resistance in acute myeloid leukemia cells via downregulation of MRP1 expression. *Biochem Biophys Res Commun* 2010; 395: 104-10.
- [54] Yaseen A, Chen S, Hock S, Rosato R, Dent P, Dai Y, Grant S. Resveratrol Sensitizes AML Cells to HDAC Inhibitors via ROS-Mediated Activation of the Extrinsic Apoptotic Pathway. *Mol Pharmacol*. 2012; doi:10.1124/mol.112.079624.
- [55] Gatouillat G, Balasse E, Joseph-Pietras D, Morjani H, *et al.* Resveratrol induces cell-cycle disruption and apoptosis in chemoresistant B16 melanoma. *J Cell Biochem* 2010; 110: 893-902.
- [56] Bhattacharya S, Darjatmoko SR, Polans AS. Resveratrol modulates the malignant properties of cutaneous melanoma through changes in the activation and attenuation of the antiapoptotic protooncogenic protein Akt/PKB. *Melanoma Res* 2011; 21: 180-7.
- [57] Osmond GW, Augustine CK, Zipfel PA, Padussis J, *et al.* Enhancing melanoma treatment with resveratrol. *J Surg Res* 2012; 172: 109-15.
- [58] Boissy P, Andersen TL, Abdallah BM, Kassem M, *et al.* Resveratrol inhibits myeloma cell growth, prevents osteoclast formation, and promotes osteoblast differentiation. *Cancer Res* 2005; 65: 9943-52.
- [59] Bhardwaj A, Sethi G, Vadhan-Raj S, Bueso-Ramos C, *et al.* Resveratrol inhibits proliferation, induces apoptosis, and overcomes chemoresistance through down-regulation of STAT-3 and nuclear factor-kappaB-regulated antiapoptotic and cell survival gene products in human multiple myeloma cells. *Blood* 2007; 109: 2293-302.
- [60] Jiang H, Shang X, Wu H, Huang G, *et al.* Combination treatment with resveratrol and sulforaphane induces apoptosis in human U251 glioma cells. *Neurochem Res* 2010; 35: 152-61.
- [61] Sun Z, Li H, Shu XH, Shi H, *et al.* Distinct sulfonation activities in resveratrol-sensitive and resveratrol-insensitive human glioblastoma cells. *FEBS J* 2012; 279: 2381-92.
- [62] Leone S, Fiore M, Lauro MG, Pino S, *et al.* Resveratrol and X rays affect gap junction intercellular communications in human glioblastoma cells. *Mol Carcinog* 2008; 47: 587-98.
- [63] Castino R, Pucer A, Veneroni R, Morani F, *et al.* Resveratrol reduces the invasive growth and promotes the acquisition of a long-lasting differentiated phenotype in human glioblastoma cells. *J Agric Food Chem* 2011; 59: 4264-72.
- [64] Filippi-Chiela EC, Villodre ES, Zamin LL, Lenz G. Autophagy interplay with apoptosis and cell cycle regulation in the growth inhibiting effect of resveratrol in glioma cells. *PLoS One* 2011; 6: e20849.
- [65] Lin CJ, Lee CC, Shih YL, Lin TY, *et al.* Resveratrol enhances the therapeutic effect of temozolomide against malignant glioma *in vitro* and *in vivo* by inhibiting autophagy. *Free Radic Biol Med* 2012; 52: 377-91.
- [66] Bai Y, Mao QQ, Qin J, Zheng XY, *et al.* Resveratrol induces apoptosis and cell cycle arrest of human T24 bladder cancer cells *in vitro* and inhibits tumor growth *in vivo*. *Cancer Sci* 2010; 101: 488-93.
- [67] Lin X, Wu G, Huo WQ, Zhang Y, *et al.* Resveratrol induces apoptosis associated with mitochondrial dysfunction in bladder carcinoma cells. *Int J Urol* 2012; 19: 757-64.
- [68] Stocco B, Toledo K, Salvador M, Paulo M, *et al.* Dose-dependent effect of resveratrol on bladder cancer cells: chemoprevention and oxidative stress. *Maturitas* 2012; 72: 72-8.
- [69] Shu XH, Li H, Sun Z, Wu ML, *et al.* Identification of metabolic pattern and bioactive form of resveratrol in human medulloblastoma cells. *Biochem Pharmacol* 2010; 79: 1516-25.
- [70] Wen S, Li H, Wu ML, Fan SH, *et al.* Inhibition of NF- $\kappa$ B signaling commits resveratrol-treated medulloblastoma cells to apoptosis without neuronal differentiation. *J Neurooncol* 2011; 104: 169-77.
- [71] Zhang P, Li H, Wu ML, Chen XY, *et al.* c-Myc downregulation: a critical molecular event in resveratrol-induced cell cycle arrest and apoptosis of human medulloblastoma cells. *J Neurooncol* 2006; 80: 123-31.
- [72] Sun X, Zhang Y, Wang J, Wei L, *et al.* Beta-arrestin 2 modulates resveratrol-induced apoptosis and regulation of Akt/GSK3 $\beta$  pathways. *Biochim Biophys Acta* 2010; 1800: 912-18.
- [73] Wang Z, Li W, Meng X, Jia B. Resveratrol induces gastric cancer cell apoptosis via reactive oxygen species, but independent of sirtuin1. *Clin Exp Pharmacol Physiol* 2012; 39: 227-32.
- [74] Aquilano K, Baldelli S, Rotilio G, Ciriolo MR. trans-Resveratrol inhibits H<sub>2</sub>O<sub>2</sub>-induced adenocarcinoma gastric cells proliferation via inactivation of MEK1/2-ERK1/2-c-Jun signalling axis. *Biochem Pharmacol* 2009; 77: 337-47.
- [75] Signorelli P, Munoz-Olaya JM, Gagliostro V, Casas J, *et al.* Dihydroceramide intracellular increase in response to resveratrol treatment mediates autophagy in gastric cancer cells. *Cancer Lett* 2009; 282: 238-43.
- [76] Truong M, Cook MR, Pinchot SN, Kunnimalaiyaan M, *et al.* Resveratrol induces Notch2-mediated apoptosis and suppression of neuroendocrine markers in medullary thyroid cancer. *Ann Surg Oncol* 2011; 18: 1506-11.
- [77] Shih A, Davis FB, Lin HY, Davis PJ. Resveratrol induces apoptosis in thyroid cancer cell lines via a MAPK- and p53-dependent mechanism. *J Clin Endocrinol Metab* 2002; 87: 1223-32.
- [78] Li Y, Bäckesjö CM, Haldosén LA, Lindgren U. Resveratrol inhibits proliferation and promotes apoptosis of osteosarcoma cells. *Eur J Pharmacol* 2009; 609: 13-8.
- [79] Alkhalaf M, Jaffal S. Potent antiproliferative effects of resveratrol on human osteosarcoma SJSA1 cells: Novel cellular mechanisms involving the ERKs/p53 cascade. *Free Radic Biol Med* 2006; 41: 318-25.
- [80] Sareen D, van Ginkel PR, Takach JC, Mohiuddin A, *et al.* Mitochondria as the primary target of resveratrol-induced apoptosis in human retinoblastoma cells. *Invest Ophthalmol Vis Sci* 2006; 47: 3708-16.

Supplementary Table 2. Neuroprotective effects of resveratrol in *in vitro* models.

| Effect             | Cell Model                                                                                                          | Treatment                                                      | Effects and Mechanisms                                                                                                          | Reference |
|--------------------|---------------------------------------------------------------------------------------------------------------------|----------------------------------------------------------------|---------------------------------------------------------------------------------------------------------------------------------|-----------|
| Antiinflammatory   | Primary rat cortical neuron-glia cultures stimulated with LPS (100 ng/mL)                                           | Pretreatment 15-60 $\mu$ M / 30 min                            | $\downarrow$ TNF- $\alpha$ , iNOS, IL-1 $\beta$ , NO                                                                            | [1]       |
|                    | murine microglial BV-2 cells stimulated with LPS (1 $\mu$ g/mL)                                                     | Pretreatment 25-100 $\mu$ M / 1h                               | $\downarrow$ TNF $\alpha$ , IL-1 $\beta$ , NO, PGE2;<br>$\downarrow$ Akt/mTOR, NF- $\kappa$ B, CREB, MAPKs                      | [2]       |
|                    | Coculture Neuronal PC12 cells and N9 microglia stimulated with LPS (1 $\mu$ g/mL)                                   | Pretreatment 0.1 $\mu$ M / 3h                                  | $\downarrow$ TNF $\alpha$ , IL-1 $\alpha$ ; $\uparrow$ Cell survival                                                            | [3]       |
|                    | Primary microglial cell cultures stimulated with LPS 10 ng/mL                                                       | 1-50 $\mu$ M / 24h                                             | $\downarrow$ PGE2, 8iso-PGF2; $\downarrow$ mPGES-1                                                                              | [4]       |
| Anti-amyloidogenic | rat astrogloma C6 cells treated with $\beta$ -amiloid                                                               | Pretreatment 2.5-20 $\mu$ M / 40 min                           | $\downarrow$ iNOS, NO; $\downarrow$ PGE2, COX-2 ;<br>$\downarrow$ NF- $\kappa$ B                                                | [5]       |
|                    | SK-N-BE cells                                                                                                       | 7.5 $\mu$ M / 6-43h                                            | $\downarrow$ ROS; $\downarrow$ Cell toxicity $\alpha$ -syn and A $\beta$ ;<br>$\uparrow$ SIRT1                                  | [6]       |
|                    | HEK293 and N2a cells stably transfected with human APP695 and primary neuronal culture male APP/PS1 transgenic mice | 10-40 $\mu$ M / 24h                                            | $\downarrow$ A $\beta$ -40, A $\beta$ -42; $\uparrow$ AMPK, CREB, ATF-1, ACC phosphorylation; $\uparrow$ c-FOS; AMPK/CREB/c-FOS | [7]       |
|                    | Primary hippocampal cell cultures                                                                                   | Pretreatment, cotreatment and post-treatment 5-40 $\mu$ M / 2h | $\uparrow$ Cell survival, PKC                                                                                                   | [8]       |
|                    | APP665-HEK293; APP695-N2a                                                                                           | 10-40 $\mu$ M / 26h                                            | $\downarrow$ A $\beta$ intracellular, Proteasome activation                                                                     | [9]       |
| Antioxidant        | Rat primary astrocyte culture                                                                                       | Pretreatment 0.1-100 $\mu$ M / 1h                              | $\downarrow$ DNA damage; $\uparrow$ Cell survival                                                                               | [10]      |
|                    | HT22 murine hippocampal neuronal cells treated with glutamate 4mM                                                   | 1-20 $\mu$ M / 24h                                             | $\uparrow$ Cell survival; $\downarrow$ ROS; $\uparrow$ SOD2 ;<br>PI3K/Akt and GSK-3 $\beta$ / $\beta$ -catenin                  | [11]      |
|                    | primary neuronal cultures treated with 30 $\mu$ M glutamate                                                         | 25 $\mu$ M 24h / 6-8h                                          | $\uparrow$ HO-1                                                                                                                 | [12]      |
|                    | Primary midbrain slice cultures treated with 30 $\mu$ M MPP+                                                        | 10-100 $\mu$ M / 48h                                           | $\uparrow$ Cell survival; $\downarrow$ ROS; $\downarrow$ DNA damage                                                             | [13]      |
|                    | Primary cortical neuronal cells                                                                                     | 5-50 $\mu$ M / 6h                                              | $\uparrow$ Cell survival; HO-1 induction                                                                                        | [14]      |
|                    | Primary rat hippocampal cells co-treated with SNP (100 $\mu$ M)                                                     | 5-25 $\mu$ M / 2h                                              | $\uparrow$ Cell survival; $\downarrow$ ROS                                                                                      | [15]      |
| Antiapoptotic      | Human neuroblastoma cell lines (SH-SY5Y and SK-N-SH) treated with prion protein peptide PrP                         | Pretreatment 1-2 $\mu$ M / 12h                                 | $\downarrow$ Bax translocation; $\downarrow$ Cytochrome C release; Autophagy regulation                                         | [16]      |
|                    | hSOD1G93A-bearing VSC4.1 cells                                                                                      | 0.5-20 $\mu$ M / 24h                                           | $\uparrow$ Cell survival; $\uparrow$ Intercellular ATP, SIRT1/PGC1- $\alpha$                                                    | [17]      |
|                    | mesencephalic dopaminergic neuronal cell culture treated with methamphetamine                                       | Pretreatment 10 $\mu$ M / 1h                                   | $\downarrow$ Caspase 3; $\downarrow$ DNA fragmentation                                                                          | [18]      |
|                    | SH-SY5Y cells treated with rotenone/ $\alpha$ -synuclein PC12 cells                                                 | 12-50 $\mu$ M / 24-72h                                         | $\uparrow$ Cell survival; $\downarrow$ DNA fragmentation; $\downarrow$ Caspase 3, PARP, AMPK/SIRT1/Autophagy                    | [19]      |
|                    | PC12 cells treated with MPP+                                                                                        | Pretreatment 0.1 $\mu$ M / 3h                                  | $\downarrow$ Bax/Bcl-2, AIF and Cytochrome C release                                                                            | [20]      |
|                    | Primary culture of neurons from SAMP8 & SAMR1 mice strains                                                          | 50 $\mu$ M / 2h                                                | $\uparrow$ Cell survival; $\downarrow$ acetylp53, SIRT1                                                                         | [21]      |

|  |                                                                                    |                                                                      |                                                                                                                                  |      |
|--|------------------------------------------------------------------------------------|----------------------------------------------------------------------|----------------------------------------------------------------------------------------------------------------------------------|------|
|  | PC12 cells with oxygen-glucose deprivation                                         | Pretreatment, cotreatment and post-treatment<br>5-25 $\mu$ M / 6-24h | $\downarrow$ ROS; $\uparrow$ GSH; $\downarrow$ HIF- $\alpha$ ; $\downarrow$ Caspase 3, Bax, Bcl-2                                | [22] |
|  | Human neuroblastoma SH-SY5Y cells treated with paclitaxel 1 $\mu$ M                | 1-100 $\mu$ M / 24h                                                  | $\uparrow$ Cell survival; $\downarrow$ caspase 7 and PPAR activation                                                             | [23] |
|  | Organotypic hippocampal slice cultures with oxygen-glucose deprivation             | 10-50 $\mu$ M / 24h                                                  | $\uparrow$ Cell survival; PI3K                                                                                                   | [24] |
|  | Neuro2a cells/mouse dorsal root ganglia (DRG) sensory and cortical neuron cultures | 10 $\mu$ M / 2-72h                                                   | $\uparrow$ AMPK phosphorylation; $\uparrow$ ACC phosphorylation; $\uparrow$ Differentiation; $\uparrow$ Mitochondrial biogenesis | [25] |

8-iso-PGF2 $\alpha$ , 8-iso-prostaglandin-F2 $\alpha$ ; ACC, acetyl-CoA carboxylase; AIF, apoptosis inducing factor; Akt, protein kinase B;  $\alpha$ -syn, alpha-synuclein; AMPK, adenosine monophosphate activated protein kinase; A $\beta$ , amyloid beta peptide; ATF1, activating transcription factor 1; Bax, Bcl2-associated X protein; Bcl-2, B-cell lymphoma 2; Casp3, caspase 3; COX-2, cyclooxygenase 2; CREB, cAMP response element-binding; GPx, glutathione peroxidase; GSH, glutathione; GSK-3 $\beta$ , glycogen synthase kinase 3beta; HIF- $\alpha$ , hypoxia inducible factor; HO-1, heme oxygenase-1; IL-1 $\alpha$ , interleukin 1-alpha; IL-1 $\beta$ , interleukin 1-beta; MAPKs, Mitogen-activated protein kinases; mPGES-1, membrane-associated PGE synthase; mTOR, mammalian target of rapamycin; iNOS, inducible nitric oxide synthase; NF $\kappa$ B, nuclear factor kappa B; NO, nitric oxide; PGC-1 $\alpha$ , peroxisome proliferator-activated receptor gamma coactivator 1-alpha; PGE $_2$ , prostaglandin E $_2$ ; PI3K, phosphoinositide 3-kinase; PKC, protein kinase C; PPAR, peroxisome proliferator-activated receptor; ROS, reactive oxygen species; SIRT1, sirtuin 1; SOD2, superoxide dismutase 2; TNF $\alpha$ , tumour necrosis factor alpha; XO, xanthine oxidase. Effect is indicated by  $\downarrow$ : reduction;  $\uparrow$ : induction; p-: phosphorylate status.

## REFERENCES FOR SUPPLEMENTARY TABLE 2.

- Zhang F, Wang H, Wu Q, Lu Y, *et al.* Resveratrol Protects Cortical Neurons against Microglia-mediated Neuroinflammation. *Phytother Res* 2012; doi: 10.1002/ptr.4734.
- Zhong LM, Zong Y, Sun L, Guo JZ, *et al.* Resveratrol inhibits inflammatory responses via the mammalian target of rapamycin signaling pathway in cultured LPS-stimulated microglial cells. *PLoS One* 2012; 7: e32195.
- Bureau G, Longpré F, Martinoli MG. Resveratrol and quercetin, two natural polyphenols, reduce apoptotic neuronal cell death induced by neuroinflammation. *J Neurosci Res* 2008; 86: 403-10.
- Candelario-Jalil E, de Oliveira AC, Gräf S, Bhatia HS, *et al.* Resveratrol potently reduces prostaglandin E2 production and free radical formation in lipopolysaccharide-activated primary rat microglia. *J Neuroinflammation* 2007; 4: 25.
- Kim YA, Lim SY, Rhee SH, Park KY, *et al.* Resveratrol inhibits inducible nitric oxide synthase and cyclooxygenase-2 expression in beta-amyloid-treated C6 glioma cells. *Int J Mol Med* 2006; 17: 1069-75.
- Albani D, Polito L, Batelli S, De Mauro S, *et al.* The SIRT1 activator resveratrol protects SK-N-BE cells from oxidative stress and against toxicity caused by alpha-synuclein or amyloid-beta (1-42) peptide. *J Neurochem* 2009; 110: 1445-56.
- Vingtdeux V, Giliberto L, Zhao H, Chandakkar P, *et al.* AMP-activated protein kinase signaling activation by resveratrol modulates amyloid-beta peptide metabolism. *J Biol Chem* 2010; 285: 9100-13.
- Han YS, Zheng WH, Bastianetto S, Chabot JG, *et al.* Neuroprotective effects of resveratrol against beta-amyloid-induced neurotoxicity in rat hippocampal neurons: involvement of protein kinase C. *Br J Pharmacol* 2004; 141: 997-1005.
- Marambaud P, Zhao H, Davies P. Resveratrol promotes clearance of Alzheimer's disease amyloid-beta peptides. *J Biol Chem* 2005; 280: 37377-82.
- Gonthier B, Allibe N, Cottet-Rousselle C, Lamarche F, *et al.* Specific Conditions for Resveratrol Neuroprotection against Ethanol-Induced Toxicity. *J Toxicol* 2012; 2012: 973134.
- Fukui M, Choi HJ, Zhu BT. Mechanism for the protective effect of resveratrol against oxidative stress-induced neuronal death. *Free Radic Biol Med* 2010; 49: 800-13.
- Sakata Y, Zhuang H, Kwansa H, Koehler RC, *et al.* Resveratrol protects against experimental stroke: putative neuroprotective role of heme oxygenase 1. *Exp Neurol* 2010; 224: 325-9.
- Okawara M, Katsuki H, Kurimoto E, Shibata H, *et al.* Resveratrol protects dopaminergic neurons in midbrain slice culture from multiple insults. *Biochem Pharmacol* 2007; 73: 550-60.
- Zhuang H, Kim YS, Koehler RC, Doré S. Potential mechanism by which resveratrol, a red wine constituent, protects neurons. *Ann N Y Acad Sci* 2003; 993: 276-86.
- Bastianetto S, Zheng WH, Quirion R. Neuroprotective abilities of resveratrol and other red wine constituents against nitric oxide-related toxicity in cultured hippocampal neurons. *Br J Pharmacol* 2000; 131: 711-20.
- Jeong JK, Moon MH, Bae BC, Lee YJ, *et al.* Autophagy induced by resveratrol prevents human prion protein-mediated neurotoxicity. *Neurosci Res* 2012; 73: 99-105.
- Wang J, Zhang Y, Tang L, Zhang N, *et al.* Protective effects of resveratrol through the up-regulation of SIRT1 expression in the mutant hSOD1-G93A-bearing motor neuron-like cell culture model of amyotrophic lateral sclerosis. *Neurosci Lett* 2011; 503: 250-5.
- Kanhasamy K, Gordon R, Jin H, Anantharam V, *et al.* Neuroprotective effect of resveratrol against methamphetamine-induced dopaminergic apoptotic cell death in a cell culture model of neurotoxicity. *Curr Neuropharmacol* 2011; 9: 49-53.
- Wu Y, Li X, Zhu JX, Xie W, *et al.* Resveratrol-activated AMPK/SIRT1/autophagy in cellular models of Parkinson's disease. *Neurosignals* 2011; 19: 163-74.
- Bournival J, Quessy P, Martinoli MG. Protective effects of resveratrol and quercetin against MPP+ -induced oxidative stress act by modulating markers of apoptotic death in dopaminergic neurons. *Cell Mol Neurobiol* 2009; 29: 1169-80.
- Cristófol R, Porquet D, Corpas R, Coto-Montes A, *et al.* Neurons from senescence-accelerated SAMP8 mice are protected against frailty by the sirtuin 1 promoting agents melatonin and resveratrol. *J Pineal Res* 2012; 52: 271-81.
- Agrawal M, Kumar V, Kashyap MP, Khanna VK, *et al.* Ischemic insult induced apoptotic changes in PC12 cells: protection by trans-resveratrol. *Eur J Pharmacol* 2011; 666: 5-11.
- Nicolini G, Rigolio R, Miloso M, Bertelli AA, *et al.* Anti-apoptotic effect of trans-resveratrol on paclitaxel-induced apoptosis in the human neuroblastoma SH-SY5Y cell line. *Neurosci Lett* 2001; 302: 41-4.
- Zamin LL, Dillenburg-Pilla P, Argenta-Comiran R, Horn AP, *et al.* Protective effect of resveratrol against oxygen-glucose deprivation in organotypic hippocampal slice cultures: Involvement of PI3-K pathway. *Neurobiol Dis* 2006; 24: 170-82.
- Dasgupta B, Milbrandt J. Resveratrol stimulates AMP kinase activity in neurons. *Proc Natl Acad Sci U S A* 2007; 104: 7217-22.



Supplementary Table 3. Effects of resveratrol on human cells involved in the vascular milieu.

| Effect                                      | Mechanisms                                                                          | Human Cell Line                   | Tested dose    | Reference |
|---------------------------------------------|-------------------------------------------------------------------------------------|-----------------------------------|----------------|-----------|
| Endothelial function improvement            | ↑eNOS                                                                               | HUVEC                             | 50 nM - 100 μM | [1-4]     |
|                                             |                                                                                     | HCAEC                             | 1-10 μM        | [5]       |
|                                             |                                                                                     | EA.hy 926                         | 1-100 μM       | [1]       |
|                                             | ↑NO release                                                                         | HUVEC                             | 50 nM – 60 μM  | [6-9]     |
| Anti-oxidant                                | ↑SOD                                                                                | HUVEC                             | 1-100 μM       | [10]      |
|                                             |                                                                                     | HCAEC                             | 3-30 μM        | [11]      |
|                                             |                                                                                     | EA.hy 926                         | 1-100 μM       | [10, 12]  |
|                                             | ↑GPx1                                                                               | HUVEC                             | 1-100 μM       | [10]      |
|                                             |                                                                                     | EA.hy 926                         | 1-100 μM       | [10, 12]  |
|                                             | ↑HO-1                                                                               | HCAEC                             | 0.1-50 μM      | [13, 14]  |
|                                             |                                                                                     | HASMC                             | 1-40 μM        | [15]      |
|                                             | ↑NQO-1; ↑GCLC; ↑Nrf-2                                                               | HCAEC                             | 0.1-50 μM      | [13]      |
|                                             | ↑Catalase; ↑GCHI                                                                    | EA.hy 926                         | 100 μM         | [12]      |
|                                             | ↓Mitochondrial O <sub>2</sub> <sup>-</sup> and H <sub>2</sub> O <sub>2</sub> ; ↑GSH | HCAEC                             | 3-30 μM        | [11]      |
|                                             | ↑Trx-1; ↑VEGF                                                                       | HCAEC                             | 1-50 μM        | [14]      |
|                                             | ↑Mitochondrial biogenesis; ↑PGC-1α; ↑Nrf-1; ↑Tfam; ↑SIRT1                           | HCAEC                             | 1-10 μM        | [5]       |
|                                             | ↑NQO-1; ↑NQO-2; ↑p53; ↑HSP27                                                        | HASMC                             | 10-50 μM       | [17]      |
|                                             | ↓ROS                                                                                | HCAEC                             | 10-100 μM      | [18, 19]  |
|                                             | ↓NOX activity                                                                       | HUVEC                             | 5-10 μM        | [20]      |
|                                             | ↓NOX4-mRNA                                                                          | HUVEC & EA.hy 926                 | 1-100 μM       | [2]       |
| Anti-inflammation                           | ↓IL-6; ↓TNFα; ↓iNOS                                                                 | HCAEC                             | 10 μM          | [21]      |
|                                             | ↓IL-6; ↓IL-8                                                                        | SGBS preadipocytes and adipocytes | 10-100 μM      | [22]      |
|                                             | ↓ICAM-1; ↓VCAM                                                                      | HUVEC                             | 0.1- 10 μM     | [23, 24]  |
|                                             |                                                                                     | HSVEC                             | 0.1&1 μM       | [23]      |
|                                             |                                                                                     | HCAEC                             | 0.1-10 μM      | [18]      |
|                                             | ↓Monocyte adhesion to EC                                                            | HUVEC                             | 1-10 μM        | [25]      |
|                                             |                                                                                     | HCAEC                             | 0.1-10 μM      | [21]      |
|                                             | ↓EC migration                                                                       | HUVEC                             | 1-20 μM        | [26]      |
|                                             | ↓MCP-1                                                                              | THP-1                             | 1-20 μM        | [26]      |
|                                             | ↓NF-κB                                                                              | HUVEC                             | 1-10 μM        | [25]      |
|                                             |                                                                                     | HCAEC                             | 0.1-10 μM      | [18, 21]  |
|                                             |                                                                                     | HASMC                             | 10-50 μM       | [17]      |
|                                             |                                                                                     | THP-1& U937                       | 30 μM          | [27]      |
| ↓MMP-9; ↓COX-2                              | HBMEC                                                                               | 5-100 μM                          | [16]           |           |
| ↓PGE <sub>2</sub> ; ↓LB <sub>4</sub> ; ↓MMP | Chondrocytes                                                                        | 1-10 μM                           | [28]           |           |

|                      |                                                                                                               |                                      |              |      |
|----------------------|---------------------------------------------------------------------------------------------------------------|--------------------------------------|--------------|------|
| Lipidic modulation   | ↓Preadipocyte proliferation; ↓Adipogenic differentiation;<br>↓De novo lipogenesis; ↓Lipogenic gene expression | SGBS preadipocytes<br>and adipocytes | 10-100 μM    | [22] |
| Platelet interaction | ↓Aggregation                                                                                                  | Washed platelets                     | 0.05-0.25 μM | [29] |
|                      | ↑Platelet apoptosis                                                                                           |                                      | 5-25 μM      | [30] |

COX, cyclooxygenase; EA.hy 926, human umbilical vein cell line; EC, endothelial cells; eNOS, endothelial nitric oxide synthase; GCH1, GTP cyclohydrolase 1; GCLC, glutamate-cysteine ligase catalytic subunit; GPx, glutathione peroxidase; GSH, glutathione; HASMC, human aortic smooth muscle cells; HBMEC, human brain microvascular endothelial cells, HCAEC, human coronary artery endothelial cells; HSVEC, human saphenous vein endothelial cell; HUVEC, human umbilical vein endothelial cells; HO-1, heme oxygenase-1; HSP, heat shock protein; ICAM-1, intercellular adhesion molecule 1; IL, interleukin; iNOS, inducible nitric oxide synthase; LB<sub>4</sub>, leukotriene B<sub>4</sub>; MCP, monocyte chemotactic protein; MMP, matrix metalloproteinase; MPO, myeloperoxidase; NADPH, nicotinamide adenine dinucleotide phosphate; NF-κB, nuclear factor-κB-binding; NO, nitric oxide; NOX, NADPH oxidase; NQO, NADPH: quinone oxidoreductase; Nrf, nuclear factor-E<sub>2</sub>-related factor; PGC, peroxisome proliferator-activated receptor-γ coactivator; PGE<sub>2</sub>, prostaglandin E<sub>2</sub>; ROS, reactive oxygen species; SGBS, human Simpson-Golabi-Behmel syndrome; SIRT1, sirtuin (silent mating type information regulation 2 homolog) 1; SOD, superoxide dismutase; Tfam, transcription factor A, mitochondrial; THP-1, human acute monocytic leukemia cell line; TNF, tumor necrosis factor; Trx, thioredoxin; U937, human macrophage cell line; VCAM-1, vascular cell adhesion protein 1; VEGF, vascular endothelial growth factor; ↓, reduction; ↑, induction.

### REFERENCES FOR SUPPLEMENTARY TABLE 3.

- [1] Wallerath T, Deckert G, Ternes T, Anderson H, *et al.* Resveratrol, a polyphenolic phytoalexin present in red wine, enhances expression and activity of endothelial nitric oxide synthase. *Circulation* 2002; 106: 1652-8.
- [2] Arunachalam G, Yao H, Sundar IK, Caito S, *et al.* SIRT1 regulates oxidant- and cigarette smoke-induced eNOS acetylation in endothelial cells: role of resveratrol. *Biochem Biophys Res Commun* 2010; 393: 66-72.
- [3] Klinge CM, Blankenship KA, Risinger KE, Bhatnagar S, *et al.* Resveratrol and estradiol rapidly activate MAPK signaling through estrogen receptors alpha and beta in endothelial cells. *J Biol Chem* 2005; 280: 7460-8.
- [4] Xu Q, Hao X, Yang Q, Si L. Resveratrol prevents hyperglycemia-induced endothelial dysfunction via activation of adenosine monophosphate-activated protein kinase. *Biochem Biophys Res Commun* 2009; 388: 389-94.
- [5] Csiszar A, Labinsky N, Pinto JT, Ballabh P, *et al.* Resveratrol induces mitochondrial biogenesis in endothelial cells. *Am J Physiol Heart Circ Physiol* 2009; 297: H13-20.
- [6] Takahashi S, Nakashima Y. Repeated and long-term treatment with physiological concentrations of resveratrol promotes NO production in vascular endothelial cells. *Br J Nutr* 2012; 107: 774-80.
- [7] Yang J, Wang N, Li J, Zhang J, *et al.* Effects of resveratrol on NO secretion stimulated by insulin and its dependence on SIRT1 in high glucose cultured endothelial cells. *Endocrine* 2010; 37: 365-72.
- [8] Klinge CM, Wickramasinghe NS, Ivanova MM, Dougherty SM. Resveratrol stimulates nitric oxide production by increasing estrogen receptor alpha-Src-caveolin-1 interaction and phosphorylation in human umbilical vein endothelial cells. *FASEB J* 2008; 22: 2185-97.
- [9] Elies J, Cuñas A, García-Morales V, Orallo F, *et al.* Trans-resveratrol simultaneously increases cytoplasmic Ca(2+) levels and nitric oxide release in human endothelial cells. *Mol Nutr Food Res* 2011; 55: 1237-48.
- [10] Spanier G, Xu H, Xia N, Tobias S, *et al.* Resveratrol reduces endothelial oxidative stress by modulating the gene expression of superoxide dismutase 1 (SOD1), glutathione peroxidase 1 (GPx1) and NADPH oxidase subunit (Nox4). *J Physiol Pharmacol* 2009; 60 (Suppl. 4): 111-6.
- [11] Ungvari Z, Labinsky N, Mukhopadhyay P, Pinto JT, *et al.* Resveratrol attenuates mitochondrial oxidative stress in coronary arterial endothelial cells. *Am J Physiol Heart Circ Physiol* 2009; 297: H1876-81.
- [12] Xia N, Daiber A, Habermeier A, Closs EI, *et al.* Resveratrol reverses endothelial nitric-oxide synthase uncoupling in apolipoprotein E knockout mice. *J Pharmacol Exp Ther* 2010; 335: 149-54.
- [13] Ungvari Z, Bagi Z, Feher A, Recchia FA, *et al.* Resveratrol confers endothelial protection via activation of the antioxidant transcription factor Nrf2. *Am J Physiol Heart Circ Physiol* 2010; 299: H18-24.
- [14] Kaga S, Zhan L, Matsumoto M, Maulik N. Resveratrol enhances neovascularization in the infarcted rat myocardium through the induction of thioredoxin-1, heme oxygenase-1 and vascular endothelial growth factor. *J Mol Cell Cardiol* 2005; 39: 813-22.
- [15] Juan SH, Cheng TH, Lin HC, Chu YL, *et al.* Mechanism of concentration-dependent induction of heme oxygenase-1 by resveratrol in human aortic smooth muscle cells. *Biochem Pharmacol* 2005; 69: 41-8.
- [16] Annabi B, Lord-Dufour S, Vézina A, Béliveau R. Resveratrol Targeting of Carcinogen-Induced Brain Endothelial Cell Inflammation Biomarkers MMP-9 and COX-2 is Sirt1-Independent. *Drug Target Insights* 2012; 6: 1-11.
- [17] Wang Z, Chen Y, Labinsky N, Hsieh TC, *et al.* Regulation of proliferation and gene expression in cultured human aortic smooth muscle cells by resveratrol and standardized grape extracts. *Biochem Biophys Res Commun* 2006; 346: 367-76.
- [18] Csiszar A, Labinsky N, Podlutzky A, Kaminski PM, *et al.* Vasoprotective effects of resveratrol and SIRT1: attenuation of cigarette smoke-induced oxidative stress and proinflammatory phenotypic alterations. *Am J Physiol Heart Circ Physiol* 2008; 294: H2721-35.
- [19] Sayin O, Arslan N, Altun ZS, Akdogan G. *In vitro* effect of resveratrol against oxidative injury of human coronary artery endothelial cells. *Turk J Med Sci* 2011; 41: 211-8.
- [20] Chow SE, Hshu YC, Wang JS, Chen JK. Resveratrol attenuates oxLDL-stimulated NADPH oxidase activity and protects endothelial cells from oxidative functional damages. *J Appl Physiol* 2007; 102: 1520-7.
- [21] Csiszar K, Smith N, Labinsky Z, Orosz A, *et al.* Resveratrol attenuates TNF-alpha-induced activation of coronary arterial endothelial cells: role of NF-kappaB inhibition. *Am J Physiol Heart Circ Physiol* 2006; 291:H1694-9.
- [22] Fischer-Posovszky P, Kukulus V, Tews D, Unterkircher T, *et al.* Resveratrol regulates human adipocyte number and function in a Sirt1-dependent manner. *Am J Clin Nutr* 2010; 92: 5-15.
- [23] Ferrero ME, Bertelli AE, Fulgenzi A, Pellegatta F, *et al.* Activity *in vitro* of resveratrol on granulocyte and monocyte adhesion to endothelium. *Am J Clin Nutr* 1998; 68: 1208-14.
- [24] Kim SW, Kim CE, Kim MH. Flavonoids inhibit high glucose-induced up-regulation of ICAM-1 via the p38 MAPK pathway in human vein endothelial cells. *Biochem Biophys Res Commun* 2011; 415: 602-7.
- [25] Moon SO, Kim W, Sung MJ, Lee S, *et al.* Resveratrol suppresses tumor necrosis factor-alpha-induced fractalkine expression in endothelial cells. *Mol Pharmacol* 2006; 70: 112-9.
- [26] Cicha I, Regler M, Urschel K, Goppelt-Struebe M, *et al.* Resveratrol inhibits monocytic cell chemotaxis to MCP-1 and prevents spontaneous endothelial cell migration through Rho kinase-dependent mechanism. *J Atheroscler Thromb* 2011; 18: 1031-42.
- [27] Holmes-McNary M, Baldwin AS Jr. Chemopreventive properties of trans-resveratrol are associated with inhibition of activation of the IkappaB kinase. *Cancer Res* 2000; 60: 3477-83.
- [28] Dave M, Attur M, Palmer G, Al-Mussawir HE, *et al.* The antioxidant resveratrol protects against chondrocyte apoptosis via effects on mitochondrial polarization and ATP production. *Arthritis Rheum* 2008; 58: 2786-97.

- [29] Shen MY, Hsiao G, Liu CL, Fong TH, *et al.* Inhibitory mechanisms of resveratrol in platelet activation: pivotal roles of p38 MAPK and NO/cyclic GMP. *Br J Haematol* 2007; 139: 475-85.
- [30] Lin KH, Hsiao G, Shih CM, Chou DS, *et al.* Mechanisms of resveratrol induced platelet apoptosis. *Cardiovasc Res* 2009; 83: 575-85.

**Supplementary Table 4. Anti-aging effects of resveratrol in *in vitro* models.**

| Cell Model                                                                                                          | Treatment                                                | Effects and Mechanisms                                                                                                                                                                                                                                                                          | Reference |
|---------------------------------------------------------------------------------------------------------------------|----------------------------------------------------------|-------------------------------------------------------------------------------------------------------------------------------------------------------------------------------------------------------------------------------------------------------------------------------------------------|-----------|
| Presenescent cultures human MRC5 fibroblasts                                                                        | 5 $\mu$ M from presenescent until senescence (44-55 PDL) | $\downarrow$ SASP development; $\downarrow$ IL-1 $\alpha$ , IL-1 $\beta$ , IL-8, IL-6, GRO- $\alpha$ , VEGF; $\uparrow$ Type I collagen; $\uparrow$ adhesion capacity                                                                                                                           | [1]       |
| C2C12 myoblast cells HeLa cells                                                                                     | 50 $\mu$ M / 4 days                                      | $\uparrow$ cAMP via Epac1; $\uparrow$ NAD <sup>+</sup> levels; $\uparrow$ oxygen consumption rate; $\uparrow$ fat oxidation; $\uparrow$ Mitochondrial Biogenesis; Inhibits PDEs; Epac1-SIRT1; PLC-Ryr2                                                                                          | [2]       |
| BAECs                                                                                                               | 0.01-1 $\mu$ M / 24h                                     | $\downarrow$ aorta senescence (SA- $\beta$ -gal); $\downarrow$ ROS; $\downarrow$ NADPH oxidase p47phox; $\uparrow$ SIRT1; SIRT1/NADPH oxidase                                                                                                                                                   | [3]       |
| Primary vascular smooth muscle cells (VSMCs) from Macaca mulatta 13 and 21 years old                                | 1 $\mu$ M / 48h                                          | $\downarrow$ IL-1 $\beta$ , TNF $\alpha$ , IFN- $\gamma$ ; $\downarrow$ IL-8, MCP-1, VEGF; $\downarrow$ IL-2, IL-4, IL-5, IL-10, IL-12/23; $\downarrow$ MIP- $\beta$ , sCD40L; $\downarrow$ mitochondrial O <sub>2</sub> – generation; $\downarrow$ NF- $\kappa$ B activation; $\uparrow$ Nrf-2 | [4]       |
| Young and senesce endothelial cells                                                                                 | 10 $\mu$ M / 1h                                          | $\downarrow$ Akt; $\downarrow$ S6k1; $\downarrow$ SOD; $\uparrow$ NO; mTOR/S6K1                                                                                                                                                                                                                 | [5]       |
| VLCAD- and CPT2- deficient human skin fibroblasts                                                                   | 10-125 $\mu$ M / 48h                                     | $\uparrow$ palmitate oxidation rate; $\uparrow$ FAO flux; $\uparrow$ VLCAD, CPT2 expression; $\uparrow$ SIRT1; $\uparrow$ PGC1- $\alpha$                                                                                                                                                        | [6]       |
| Endothelial cells of cardiac coronary vessels from patients receiving coronary artery CABG surgery and SD aged rats | 10-100 $\mu$ M / 48h                                     | $\uparrow$ SIRT1 expression and activity; $\downarrow$ ROS                                                                                                                                                                                                                                      | [7]       |
| SaOS2 & RGCcells incubated in reduced glucose levels                                                                | 20-160 $\mu$ M / 48h                                     | $\downarrow$ SIRT1 expression; $\uparrow$ TXNIP (20-40 $\mu$ M); $\downarrow$ TXNIP (80-160 $\mu$ M)                                                                                                                                                                                            | [8]       |
| Retinal Stem Cells                                                                                                  | 5-20 $\mu$ M / 48h                                       | $\uparrow$ SIRT1 mRNA and activity; $\uparrow$ Cell survival; $\downarrow$ ROS                                                                                                                                                                                                                  | [9]       |
| human WI-38 fibroblasts/ HT-1080 cells/ Retina pigment epithelial cells                                             | 3-200 $\mu$ M / 72 h                                     | $\downarrow$ Senescence morphology; $\uparrow$ proliferation; $\downarrow$ S6 phosphorylation; mTOR                                                                                                                                                                                             | [10]      |
| Mortal human diploid foreskin fibroblasts                                                                           | 0.2-1 $\mu$ M / 24h                                      | $\downarrow$ INK4a mRNA; $\downarrow$ $\alpha$ -macroglobulin mRNA; $\downarrow$ UBE2D3                                                                                                                                                                                                         | [11]      |

Akt, protein kinase B; cAMP, cyclic adenosine monophosphate; CPT2, carnitine palmitoyl transferase 2; Epac1, exchange protein activated by cyclic AMP; FAO, mitochondrial fatty acid  $\beta$ -oxidation; IFN- $\gamma$ , interferon-gamma; IL-2, interleukin 2; IL-4, interleukin 4; IL-5, interleukin 5; IL-6, interleukin 6; IL-8, interleukin 8; IL-10, interleukin 10; IL-12/23, interleukin 12/23; IL-1 $\beta$ , interleukin 1-beta; IL-6, interleukin 6; MCP-1, monocyte chemoattractant protein-1; MIP-1 $\beta$ , macrophage inflammatory protein-1-beta; NADPH, nicotinamide adenine dinucleotide phosphate; NF- $\kappa$ B, nuclear factor kappa B; NO, nitric oxide; Nrf-2, nuclear factor erythroid 2-related factor 2; PGC- $\beta$ , peroxisome proliferator-activated receptor gamma coactivator 1 beta; PLC, phospholipase C; ROS, reactive oxygen species; Ryr2, ryanodine receptor 2; S6, ribosomal protein 6; S6k1, ribosomal protein S6 kinase beta-1; SA- $\beta$ -Gal, senescence-associated beta-galactosidase; SASP, senescence-associated secretory phenotype; sCD40L, soluble CD40 ligand; SIRT1, sirtuin 1; SOD, superoxide dismutase; TXNIP, thioredoxin-interacting protein; TNF $\alpha$ , tumour necrosis factor alpha; UBE2D3, ubiquitin-conjugating enzyme E2D 3; VEGF, vascular endothelial growth factor; VLCAD, very-long-chain Acyl-CoA dehydrogenase. Effect is indicated by  $\downarrow$ : reduction;  $\uparrow$ : induction; p-: phosphorylate status.

**REFERENCES FOR SUPPLEMENTARY TABLE 4.**

- [1] Pitozzi V, Mocali A, Laurenzana A, Giannoni E, *et al.* Chronic Resveratrol Treatment Ameliorates Cell Adhesion and Mitigates the Inflammatory Phenotype in Senescent Human Fibroblasts. *J Gerontol A Biol Sci Med Sci* 2012; doi: 10.1093/gerona/gls183.
- [2] Park SJ, Ahmad F, Philp A, Baar K, *et al.* Resveratrol ameliorates aging-related metabolic phenotypes by inhibiting cAMP phosphodiesterases. *Cell* 2012; 148: 421-33.
- [3] Tang Y, Xu J, Qu W, Peng X, *et al.* Resveratrol reduces vascular cell senescence through attenuation of oxidative stress by SIRT1/NADPH oxidase-dependent mechanisms. *J Nutr Biochem* 2012; doi.org/10.1016/j.jnutbio.2011.08.008.
- [4] Csiszar A, Sosnowska D, Wang M, Lakatta EG, *et al.* Age-associated proinflammatory secretory phenotype in vascular smooth muscle cells from the non-human primate Macaca mulatta: reversal by resveratrol treatment. *J Gerontol A Biol Sci Med Sci* 2012; 67:811-20.
- [5] Rajapakse AG, Yepuri G, Carvas JM, Stein S, *et al.* Hyperactive S6K1 mediates oxidative stress and endothelial dysfunction in aging: inhibition by resveratrol. *PLoS One* 2011; 6: e19237.
- [6] Bastin J, Lopes-Costa A, Djouadi F. Exposure to resveratrol triggers pharmacological correction of fatty acid utilization in human fatty acid oxidation-deficient fibroblasts. *Hum Mol Genet* 2011; 20: 2048-57.
- [7] Kao CL, Chen LK, Chang YL, Yung MC, *et al.* Resveratrol protects human endothelium from H(2)O(2)-induced oxidative stress and senescence via SirT1 activation. *J Atheroscler Thromb* 2010; 17: 970-9.
- [8] Mousa SA, Gallati C, Simone T, Dier E, *et al.* Dual targeting of the antagonistic pathways mediated by Sirt1 and TXNIP as a putative approach to enhance the efficacy of anti-aging interventions. *Aging (Albany NY)* 2009; 1: 412-24.
- [9] Peng CH, Chang YL, Kao CL, Tseng LM, *et al.* SirT1-a sensor for monitoring self-renewal and aging process in retinal stem cells. *Sensors (Basel)* 2010; 10: 6172-94.
- [10] Demidenko ZN, Blagosklonny MV. At concentrations that inhibit mTOR, resveratrol suppresses cellular senescence. *Cell Cycle* 2009; 8: 1901-4.
- [11] Stefani M, Markus MA, Lin RC, Pinese M, *et al.* The effect of resveratrol on a cell model of human aging. *Ann N Y Acad Sci* 2007; 1114: 407-18.

Supplementary Table 5. Cancer chemopreventive effects of resveratrol and related mechanisms in animal models.

| Cancer Model | Animal Model                               | Treatment                                                     | Effects and Mechanisms                                                                                                                                                                                                                                                                                                                                                                              | Reference |
|--------------|--------------------------------------------|---------------------------------------------------------------|-----------------------------------------------------------------------------------------------------------------------------------------------------------------------------------------------------------------------------------------------------------------------------------------------------------------------------------------------------------------------------------------------------|-----------|
| Colon        | Apc <sup>Min</sup> mice (male)             | 45 µg/kg bw (po) / 60 days                                    | ↓BaP-induced colon carcinogenesis in Apc <sup>Min</sup> mouse model; ↓number of colon adenomas                                                                                                                                                                                                                                                                                                      | [1]       |
|              | C57BL/6 mice                               | 48 mg/kg bw/day (diet) / 62 days                              | ↓colon cancer incidence                                                                                                                                                                                                                                                                                                                                                                             | [2]       |
|              | C57BL/6J A-pcMin/+ mice (male)             | 60, 240 mg/kg bw/day (diet) / 3 weeks                         | ↓adenoma load; ↓PGE-2 levels in the intestinal mucosa; ↓COX activity                                                                                                                                                                                                                                                                                                                                | [3]       |
|              | Wistar rats (male)                         | 8 mg/kg/day (po) / 15, 30 weeks                               | ↓DMH-induced colon carcinogenesis; ↓number of ACF                                                                                                                                                                                                                                                                                                                                                   | [4]       |
|              | CF-1 mice                                  | 2.4 mg/kg bw/day (diet) / 5 weeks                             | ↓number of ACF/mouse                                                                                                                                                                                                                                                                                                                                                                                | [5]       |
|              | F344 rats (male)                           | 200 µg/kg bw/day (in water) / 100 days                        | ↓AOM-induced colon carcinogenesis; ↓number and multiplicity of ACF colon; ↑Bax; ↓p21                                                                                                                                                                                                                                                                                                                | [6]       |
| Prostate     | PTEN-KO mice (male)                        | 50 mg/kg (po) / 7 weeks (3 times/week)                        | ↓prostate cancer incidence                                                                                                                                                                                                                                                                                                                                                                          | [7]       |
|              | SV-40 Tag rats (male)                      | 25 mg/kg/day (diet) / 30 weeks                                | ↓Incidence; ↓cell proliferation; ↓IGF-1                                                                                                                                                                                                                                                                                                                                                             | [8]       |
|              | TRAP rats (male heterozygous)              | 50, 100, 200 µg/mL/day (in water) / 7 weeks                   | ↓prostate cancer growth; ↑apoptosis; ↓AR                                                                                                                                                                                                                                                                                                                                                            | [9]       |
|              | BALB/cAnNCR-nu/nu mice (male athymic nude) | 50, 100 mg/kg (diet) / 2+7 weeks                              | ↓cancer growth; ↑angiogenesis; ↓apoptosis                                                                                                                                                                                                                                                                                                                                                           | [10]      |
|              |                                            | 30 mg/kg (po) / 6 weeks (3 times/week)                        | ↑apoptosis inducing potential of TRAIL in PC-3 xenografts in nude mice; ↓cell proliferation; ↓angiogenesis; ↑TRAIL-R1/DR4, TRAIL-R2/DR5, Bax and p27/(KIP1); ↓Bcl-2, cyclin-D1; ↓MMP-2, -9; ↓number of blood vessels in tumors; ↓EGFR2; ↓p-FOXO3a                                                                                                                                                   | [11]      |
| Liver        | Sprague–Dawley rats (female)               | 50, 100, 300 mg/kg bw/day (diet) / 4+20 weeks                 | ↓Incidence, total number and multiplicity of visible hepatocyte nodules; ↓cell proliferation; ↑apoptosis; ↑Bax; ↓Bcl-2; ↓DENA-initiated and PB-promoted hepatocarcinogenesis; ↓DENA-induced increased expressions of hepatic HSP70, COX-2, NF-κB; ↓DENA-induced of the level and expression of hepatic TNFα, IL-1β and IL-6; ↓DENA-induced hepatic lipid peroxidation and protein oxidation; ↑Nrf-2 | [12-15]   |
|              | BALB/C mice                                | 15 mg/kg/ (ip) / 21 days (every 2 days)                       | ↓growth of CAV1-expressing HepG2 cells transplanted in female mice; ↓cell proliferation; ↑apoptosis; ↑caspase 3; ↑p-p38, p-ERK                                                                                                                                                                                                                                                                      | [16]      |
|              |                                            | 5, 10, 15 mg/kg/day (ip) / 10 days                            | ↓tumor growth and size in male mice implanted with H22 hepatoma cells; S arrest cell cycle; ↑enhanced 5-FU effect (synergy)                                                                                                                                                                                                                                                                         | [17]      |
|              |                                            | 5, 10, 15 mg/kg/day (ip) / 10 days                            | ↓tumor growth and size in mice implanted with H22 hepatoma cells; ↓cyclin-B1; ↓p34cdc2                                                                                                                                                                                                                                                                                                              | [18]      |
|              |                                            | 500, 1000, 1500 mg/kg/day (ip) / 10 days                      | ↓tumor weights in mice implanted with H22 hepatoma cells                                                                                                                                                                                                                                                                                                                                            | [19]      |
|              | C57BL/6J mice                              | 20 mg/kg b.i.d. (diet) or 23 mg/L in drinking water / 10 days | ↓B16M carcinoma cell growth; S and G <sub>2</sub> /M arrest cell cycle; ↑apoptosis; ↓ROS; ↓metastasis                                                                                                                                                                                                                                                                                               | [20]      |
|              | Wistar rats (male)                         | 20 mg/kg (ip) / 7 days                                        | ↓DOX-induced cellular damage; ↓DOX-induced increased iNOS and eNOS expression; ↓p53                                                                                                                                                                                                                                                                                                                 | [21]      |
|              |                                            | 1 mg/kg (ip) / 7 days                                         | ↓tumour cell content in male rats implanted with AH-130 hepatoma                                                                                                                                                                                                                                                                                                                                    | [22]      |

|                      |                              |                                                                   |                                                                                                                                         |      |
|----------------------|------------------------------|-------------------------------------------------------------------|-----------------------------------------------------------------------------------------------------------------------------------------|------|
|                      |                              |                                                                   | cells; G <sub>2</sub> /M arrest cell cycle; ↑apoptosis                                                                                  |      |
|                      | Donryu rats (male)           | 10, 50 ppm (diet) / 20 days                                       | ↓tumor size in male rats implanted with AH109A hepatoma cells; ↓lipid peroxidation; ↓serum triglycerides; ↓VLDL; ↓LDL                   | [23] |
| Breast               | BALB/c mice (female)         | 100, 200 mg/kg (po) / 21 days                                     | ↓metastasis of 4T1 cells in BALB/C mice; ↓plasma MMP-9 activity                                                                         | [24] |
|                      | Athymic nu/nu mice (female)  | 16.5 mg/kg/ (ip) / 2 weeks (3 times/week)                         | ↑paclitaxel-induced death of MDA-MB-435s cancer cells subc. injected in mice; ↓apoptosis                                                | [25] |
|                      | FVB/N mice (female)          | 1 mg/L in drinking water / 10 weeks                               | ↓latency; ↓number of mammary tumors; ↓metastasis; ↑apoptosis                                                                            | [26] |
|                      | Swiss mice (female)          | 20, 40 mg/kg/day / 20 days                                        | ↓tumor size; ↑cisplatin-chemoprevention                                                                                                 | [27] |
|                      | Sprague-Dawley rats (female) | 50 mg/kg bw/day (diet) / 18 weeks                                 | ↓tumor multiplicity rates; ↓tumor latency; ↓DMBA-induced mammary tumorigenesis; ↓cell proliferation; ↑apoptosis                         | [28] |
|                      |                              | 0.5 mg/kg bw (diet) / 120 days                                    | ↓DMBA-induced mammary tumorigenesis; ↓tumor multiplicity; ↓tumor incidence; ↓COX-2; ↓MMP-9                                              | [29] |
| Leukemia             | BALB/c mice                  | 12.5, 25, 50 mg/kg/day/3 weeks (ig) injection p. with L1210 cells | ↑long-term survival of tumor (L1210 cells)-bearing mice; ↑CD4/CD8 ratios; ↑lymphocyte proliferation; ↑NK cell activity; ↓IL-6           | [30] |
| Melanoma             | C57BL/6 mice (female)        | 100 mg/kg bw (po) / 12 days                                       | ↓development of vascular leak syndrome (VLS) induced by IL-2; ↑tumor metastasis and growth; ↑endothelial cell integrity tumor incidence | [31] |
|                      | (male)                       | 1 mg/kg (po) / 12 days                                            | ↓metastatic growth of melanoma; ↓IL-8, VCAM-1; ↓adhesion- and proliferation-stimulating effects of IL-18; ↓NFκB                         | [32] |
|                      | SENCAR mice                  | Applied topically / 4 weeks                                       | ↓DMBA-induced hyperplasia skin; ↓Bcl-2; ↓p2; ↓COX-2; ↓CYP1B1; ↓c-jun and c-fos                                                          | [33] |
|                      | C3H/HeN mice (female)        | 10 μmol/mouse (topically) / 25 weeks                              | ↓melanoma incidence-induced by DMBA; ↓tumor size; ↓angiogenesis                                                                         | [34] |
|                      | Swiss mice (female)          | 25-50 μM/mouse (applied topically) / 28 weeks                     | ↓DMBA-induced hyperplasia skin; ↓Bcl-2, survivin; ↑p53, Bax DMBA-induced; ↑Cyt-c, caspases activation; ↑Apaf-1; ↓PI3K/Akt pathway       | [35] |
| Neuroblastoma/glioma | A/J mice (female)            | 20 mg/twice a week (iv) / 20 days                                 | ↓tumor growth; ↑immunocytokine therapy; ↑necrosis                                                                                       | [36] |
|                      | (male)                       | 40 mg/kg/day (sc) / 28 days                                       | ↓growth subcutaneous neuroblastomas; ↑long-term survival                                                                                | [37] |
|                      | Fischer 344 rats             | 10 or 40 mg/kg/day(ip) / 4 weeks                                  | ↓tumor growth after subc. injection of RT-2 glioma cells; ↑long-term survival; ↓microvessels density in glioma tissues; ↑apoptosis      | [38] |
|                      | BALB/cA nude mice            | 40 mg/kg (po) / 28 days                                           | ↑TMZ induced-inhibition of the growth of implanted glioma cells in nude mice; ↑AMPK; ↓mTOR, Bcl-2; ↑apoptosis                           | [39] |
| Gastric              | BALB/C nude mice (female)    | 10 and 12.5 mg/kg (ip) / 12 days                                  | ↑TMZ induced-inhibition of the growth and volume of implanted glioma cells in nude mice; ↓ROS/ERK-mediated autophagy; ↑apoptosis        | [40] |
|                      |                              | 500, 1000, 1500 mg/kg (sc) / 6 times at an interval of 2 days     | ↓carcinoma growth after subc. injection of human primary gastric cancer cells; ↑apoptosis; ↓Bcl-2; ↑Bax                                 | [41] |
|                      | NMRI mice (male)             | 1 mg/kg (ip) / 3 days                                             | ↓tumor growth after implanted MAC16 tumor cells; ↓NF-κB DNA-binding activity                                                            | [42] |

|            |                            |                                                    |                                                                                                                                                                                                     |      |
|------------|----------------------------|----------------------------------------------------|-----------------------------------------------------------------------------------------------------------------------------------------------------------------------------------------------------|------|
| Esophagus  | Sprague–Dawley rats (male) | 7 mg/kg (ip) / 5 months                            | ↓esophagitis after esophagoduodenal anastomosis; ↓incidence of intestinal metaplasia; ↓incidence of carcinoma                                                                                       | [43] |
|            | F344 rats (male)           | 1, 2 mg/kg / 16 weeks (diet), 20 weeks (ip)        | ↓number of NMBA-induced esophageal tumors; ↓ size of maximum tumors; ↓COX-1, -2, PGE <sub>2</sub> synthesis                                                                                         | [44] |
| Lung       | Immunodeficient mice       | 20 mg/kg (ip) / 8 weeks                            | ↓tumor growth after subc. injection of A549 cells and A549/FOXC2 cells; ↓metastasis; ↓FOXC2                                                                                                         | [45] |
|            | C57BL/6 mice (female)      | 2.5 and 10 mg/kg (ip) / 22 days                    | ↓tumor growth after subc. injection of Lewis lung carcinoma cells; ↓tumor weight; ↓number of tumor cell colonies compared with the LLC-bearing mice                                                 | [46] |
| Pancreatic | BALB/c nu/nu mice          | 20, 40 and 60 mg/kg (po) / 6 weeks (5 days a week) | ↓PANC-1cells implanted pancreatic tumor growth; ↑apoptosis; ↓cell proliferation in tumor tissues; ↑Bim, p27/KIP1 and p21/CIP1, cleaved caspase-3; ↓PCNA; ↓p-ERK, p-PI3K, p-Akt, p-FOXO and p-FOXO3a | [47] |

5-FU, 5-fluorouracil; ACF, aberrant crypt foci; Akt, serine/threonine protein kinase; AMPK, adenosine monophosphate activated protein kinase; AOM, Azoxymethane; APAF-1, apoptotic protease activating factor 1; AR, androgen receptor; BaP, Benzo[a]pyrene; Bcl-2, B-cell lymphoma 2; b.i.d., twice a day; bw, body weight; CAV-1, caveolin-1; COX-2, cyclooxygenase 2; CYP1B1, cytochrome P450 1B1; Cyt-c, cytochrome C; DENA, diethylnitrosamine; DMBA, 7,12-dimethylbenzanthracene; DMH, 1,2-dimethylhydrazine; DOX, doxorubicin; DR4/5, tumour necrosis factor receptor superfamily, member 10a/10b; EGFR, endothelial growth factor receptor; eNOS, endothelial nitric oxide synthase; ERK, extracellular signal regulated kinase; FOXC2, forkhead box protein C2; FOXO3a, Forkhead transcription factor O3; po, per oral; IGF-1, insulin like growth factor-1; IL, interleukin; iNOS, inducible nitric oxide synthase; ig, intragastric; ip, intraperitoneally; LDL, low density lipoprotein; MMP, matrix metalloproteinase; mTOR, mammalian target of rapamycin; NFkB, nuclear factor kappa B; NK, natural killer cells; Nrf-2, hepatic nuclear factor E2-related factor 2; p27, cyclin dependant kinase inhibitor 27; p53, tumour protein 53; PGE<sub>2</sub>, prostaglandin E2; PI3K, phosphoinositide 3 kinases; ROS, reactive oxygen species; sc, subcutaneously; TMZ, temozolomide; TNF $\alpha$ , tumour necrosis factor alpha; TRAIL, TNF-related apoptosis inducing ligand; VCAM-1, vascular cell adhesion molecule 1; VLDL, very low-density lipoprotein. Effect is indicated by ↓: reduction; ↑: induction; p-: phosphorylate status.

#### REFERENCES FOR SUPPLEMENTARY TABLE 5.

- [1] Huderson AC, Myers JN, Niaz MS, Washington MK, *et al.* Chemoprevention of benzo(a)pyrene-induced colon polyps in Apc(Min) mice by resveratrol. *J Nutr Biochem* 2012; doi.org/10.1016/j.jnutbio.2012.04.005.
- [2] Cui X, Jin Y, Hofseth AB, Pena E, *et al.* Resveratrol suppresses colitis and colon cancer associated with colitis. *Cancer Prev Res* 2010; 3: 549-59.
- [3] Sale S, Tunstall RG, Ruparelia KC, Potter GA, *et al.* Comparison of the effects of the chemopreventive agent resveratrol and its synthetic analog trans 3,4,5,4'-tetramethoxystilbene (DMU-212) on adenoma development in the Apc(Min+) mouse and cyclooxygenase-2 in human-derived colon cancer cells. *Int J Cancer* 2005; 115: 194-201.
- [4] Sengottuvelan M, Nalini N. Dietary supplementation of resveratrol suppresses colonic tumour incidence in 1,2-dimethylhydrazine-treated rats by modulating biotransforming enzymes and aberrant crypt foci development. *Br J Nutr* 2006; 96: 145-53.
- [5] Kineman BD, Au A, Paiva NL, Kaiser MS, *et al.* Transgenic alfalfa that accumulates piceid (Trans-Resveratrol-3-O-Beta-D-glucopyranoside) requires the presence of beta-glucosidase to inhibit the formation of aberrant crypt foci in the colon of CF-1 mice. *Nutr Cancer* 2007; 58: 66-74.
- [6] Tessitore L, Davit A, Sarotto I, Caderni G. Resveratrol depresses the growth of colorectal aberrant crypt foci by affecting bax and p21(CIP) expression. *Carcinogenesis* 2000; 21: 1619-22.
- [7] Narayanan NK, Nargi D, Randolph C, Narayanan BA. Liposome encapsulation of curcumin and resveratrol in combination reduces prostate cancer incidence in PTEN knockout mice. *Int J Cancer* 2009; 125: 1-8.
- [8] Harper CE, Cook LM, Patel BB, Wang J, *et al.* Genistein and resveratrol, alone and in combination, suppress prostate cancer in SV-40 tag rats. *Prostate* 2009; 69: 1668-82.
- [9] Seeni A, Takahashi S, Takeshita K, Tang M, *et al.* Suppression of prostate cancer growth by resveratrol in the transgenic rat for adenocarcinoma of prostate (TRAP) model. *Asian Pac J Cancer Prev* 2008; 9: 7-14.
- [10] Wang TT, Hudson TS, Wang TC, Reimsberg CM, *et al.* Differential effects of resveratrol on androgen-responsive LNCaP human prostate cancer cells *in vitro* and *in vivo*. *Carcinogenesis* 2008; 29: 2001-10.
- [11] Ganapathy S, Chen Q, Singh KP, Shankar S, *et al.* Resveratrol enhances antitumor activity of TRAIL in prostate cancer xenografts through activation of FOXO transcription factor. *PLoS One* 2010; 5: e15627.
- [12] Bishayee A, Dhir N. Resveratrol-mediated chemoprevention of diethylnitrosamine-initiated hepatocarcinogenesis: inhibition of cell proliferation and induction of apoptosis. *Chem Biol Interact* 2009; 179: 131-44.
- [13] Bishayee A, Waghay A, Barnes KF, Mbimba T, *et al.* Suppression of the inflammatory cascade is implicated in resveratrol chemoprevention of experimental hepatocarcinogenesis. *Pharm Res* 2010; 27: 1080-91.
- [14] Bishayee A, Barnes KF, Bhatia D, Darvesh AS, *et al.* Resveratrol suppresses oxidative stress and inflammatory response in diethylnitrosamine-initiated rat hepatocarcinogenesis. *Cancer Prev Res* 2010; 3: 753-63.
- [15] Mbimba T, Awale P, Bhatia D, Geldenhuys WJ, *et al.* Alteration of hepatic proinflammatory cytokines is involved in the resveratrol-mediated chemoprevention of chemically-induced hepatocarcinogenesis. *Curr Pharm Biotechnol* 2012; 13: 229-34.
- [16] Yang H, Chen Wq, Cao X, Du LF, *et al.* Caveolin-I enhances resveratrol-mediated cytotoxicity and transport in a hepatocellular carcinoma model. *J Transl Med* 2009; 7: 22.
- [17] Wu SL, Sun ZJ, Yu L, Meng KW, *et al.* Effect of resveratrol and in combination with 5-FU on murine liver cancer. *World J Gastroenterol* 2004; 10: 3048-52.
- [18] Yu L, Sun ZJ, Wu SL, Pan CE. Effect of resveratrol on cell cycle proteins in murine transplantable liver cancer. *World J Gastroenterol* 2003; 9: 2341-3.
- [19] Liu HS, Pan CE, Yang W, Liu XM. Antitumor and immunomodulatory activity of resveratrol on experimentally implanted tumor of H22 in BALB/c mice. *World J Gastroenterol* 2003; 9: 1474-6.
- [20] Asensi M, Medina I, Ortega A, Carretero J, *et al.* Inhibition of cancer growth by resveratrol is related to its low bioavailability. *Free Radic Biol Med* 2002; 33: 387-98.
- [21] Oktem G, Uysal A, Oral O, Sezer ED, *et al.* Resveratrol attenuates doxorubicin-induced cellular damage by modulating nitric oxide and apoptosis. *Exp Toxicol Pathol* 2012; 64: 471-9.

- [22] Carbó N, Costelli P, Baccino FM, López-Soriano FJ, *et al.* Resveratrol, a natural product present in wine, decreases tumour growth in a rat tumour model. *Biochem Biophys Res Commun* 1999; 254: 739-43.
- [23] Miura D, Miura Y, Yagasaki K. Hypolipidemic action of dietary resveratrol, a phytoalexin in grapes and red wine, in hepatoma-bearing rats. *Life Sci* 2003; 73: 1393-400.
- [24] Lee HS, Ha AW, Kim WK. Effect of resveratrol on the metastasis of 4T1 mouse breast cancer cells *in vitro* and *in vivo*. *Nutr Res Pract* 2012; 6: 294-300.
- [25] Fukui M, Yamabe N, Zhu BT. Resveratrol attenuates the anticancer efficacy of paclitaxel in human breast cancer cells *in vitro* and *in vivo*. *Eur J Cancer* 2010; 46: 1882-91.
- [26] Provinciali M, Re F, Donnini A, Orlando F, *et al.* Effect of Resveratrol on the development of spontaneous mammary tumors in HER-2/neu transgenic mice. *Int J Cancer* 2005; 115: 36-45.
- [27] El-Mowafy AM, El-Mesery ME, Salem HA, Al-Gayyar MM, *et al.* Prominent chemopreventive and chemoenhancing effects for resveratrol: unraveling molecular targets and the role of C-reactive protein. *Chemotherapy* 2010; 56: 60-5.
- [28] Whitsett TG Jr, Carpenter DM, Lamartiniere CA. Resveratrol, but not EGCG, in the diet suppresses DMBA-induced mammary cancer in rats. *J Carcinog* 2006; 5: 15.
- [29] Banerjee S, Bueso-Ramos C, Aggarwal BB. Suppression of 7,12-dimethylbenz(a)anthracene-induced mammary carcinogenesis in rats by resveratrol: Role of nuclear factor-kappa B, cyclooxygenase 2, and matrix metalloproteinase 9. *Cancer Res* 2002; 62: 4945-54.
- [30] Li T, Fan GX, Wang W, Li T, *et al.* Resveratrol induces apoptosis, influences IL-6 and exerts immunomodulatory effect on mouse lymphocytic leukemia both *in vitro* and *in vivo*. *Int Immunopharmacol* 2007; 7: 1221-31.
- [31] Guan H, Singh NP, Singh UP, Nagarkatti PS, *et al.* Resveratrol prevents endothelial cells injury in high-dose interleukin-2 therapy against melanoma. *PLoS One* 2012; 7: e35650.
- [32] Salado C, Olaso E, Gallot N, Valcarcel M, *et al.* Resveratrol prevents inflammation-dependent hepatic melanoma metastasis by inhibiting the secretion and effects of interleukin-18. *J Transl Med* 2011; 9: 59.
- [33] Kowalczyk MC, Kowalczyk P, Tolstykh O, Hanausek M, *et al.* Synergistic effects of combined phytochemicals and skin cancer prevention in SEN-CAR mice. *Cancer Prev Res* 2010; 3: 170-8.
- [34] Yusuf N, Nasti TH, Meleth S, Elmets CA. Resveratrol enhances cell-mediated immune response to DMBA through TLR4 and prevents DMBA induced cutaneous carcinogenesis. *Mol Carcinog* 2009; 48: 713-23.
- [35] Roy P, Kalra N, Prasad S, George J, *et al.* Chemopreventive Potential of Resveratrol in Mouse Skin Tumors Through Regulation of Mitochondrial and PI3K/AKT Signaling Pathways. *Pharm Res* 2009; 26: 211-7.
- [36] Soto BL, Hank JA, Van De Voort TJ, Subramanian L, *et al.* The anti-tumor effect of resveratrol alone or in combination with immunotherapy in a neuroblastoma model. *Cancer Immunol Immunother* 2011; 60: 731-8.
- [37] Chen Y, Tseng SH, Lai HS, Chen WJ. Resveratrol-induced cellular apoptosis and cell cycle arrest in neuroblastoma cells and antitumor effects on neuroblastoma in mice. *Surgery* 2004; 136: 57-66.
- [38] Tseng SH, Lin SM, Chen JC, Su YH, *et al.* Resveratrol suppresses the angiogenesis and tumor growth of gliomas in rats. *Clin Cancer Res* 2004; 10: 2190-202.
- [39] Yuan Y, Xue X, Guo RB, Sun XL, *et al.* Resveratrol enhances the antitumor effects of temozolomide in glioblastoma via ROS-dependent AMPK-TSC-mTOR signaling pathway. *CNS Neurosci Ther* 2012; 18: 536-46.
- [40] Lin CJ, Lee CC, Shih YL, Lin TY, *et al.* Resveratrol enhances the therapeutic effect of temozolomide against malignant glioma *in vitro* and *in vivo* by inhibiting autophagy. *Free Radic Biol Med* 2012; 52: 377-91.
- [41] Zhou HB, Chen JJ, Wang WX, Cai JT, *et al.* Anticancer activity of resveratrol on implanted human primary gastric carcinoma cells in nude mice. *World J Gastroenterol* 2005; 11: 280-4.
- [42] Wyke SM, Russell ST, Tisdale MJ. Induction of proteasome expression in skeletal muscle is attenuated by inhibitors of NF-kappaB activation. *Br J Cancer* 2004; 91: 1742-50.
- [43] Woodall CE, Li Y, Liu QH, Wo J, *et al.* Chemoprevention of metaplasia initiation and carcinogenic progression to esophageal adenocarcinoma by resveratrol supplementation. *Anti Cancer Drug* 2009; 20: 437-43.
- [44] Li ZG, Hong T, Shimada Y, Komoto I, *et al.* Suppression of N-nitrosomethylbenzylamine (NMBA)-induced esophageal tumorigenesis in F344 rats by resveratrol. *Carcinogenesis* 2002; 23: 1531-6.
- [45] Yu YH, Chen HA, Chen PS, Cheng YJ, *et al.* MiR-520h-mediated FOXC2 regulation is critical for inhibition of lung cancer progression by resveratrol. *Oncogene* 2012; doi: 10.1038/onc.2012.74.
- [46] Kimura Y, Okuda H. Resveratrol isolated from *Polygonum cuspidatum* root prevents tumor growth and metastasis to lung and tumor-induced neovascularization in Lewis lung carcinoma-bearing mice. *J Nutr* 2001; 131: 1844-49.
- [47] Roy SK, Chen Q, Fu J, Shankar S, *et al.* Resveratrol inhibits growth of orthotopic pancreatic tumors through activation of FOXO transcription factors. *PLoS One* 2011; 6: e25166.

Supplementary Table 6. Effects of exposure to resveratrol on animal models of cardiovascular disease.

| Model                                        | Animal Model                     | Effect                                                             | Treatment                          | Duration         | Reference                |
|----------------------------------------------|----------------------------------|--------------------------------------------------------------------|------------------------------------|------------------|--------------------------|
| Hypertension/Vascular function               | Mouse                            | ↓Blood pressure                                                    | ~10 mg/kg bw/day                   | 2; 4 weeks       | [1]                      |
|                                              | Rat                              | ↓Blood pressure                                                    | 1-800 mg/kg bw/day                 | 2h-10 weeks      | [2-10]                   |
|                                              |                                  | → Blood pressure                                                   | 2.5 mg/kg bw/day                   | 5; 10 weeks      | [11-13]                  |
|                                              |                                  | ↓Cardiac Hypertrophy                                               | 2.5-800 mg/kg bw/day               | 5 days-10 weeks  | [5, 8, 13-16]            |
|                                              |                                  | ↑Survival rate                                                     | 10-800 mg/kg bw/day                | 21 days-8 weeks  | [5, 16-18]               |
|                                              |                                  | ↓Right ventricular systolic pressure                               | 3-30 mg/kg bw b.i.d.               | 14-21 days       | [16, 19, 20]             |
|                                              |                                  | ↓Cardiac contractility                                             | 1-3 mg/kg bw/day                   | 14 days; 4 weeks | [6, 20]                  |
|                                              |                                  | ↓Vascular remodeling                                               | 2.5; 25 mg/kg bw/day               | 1-8 weeks        | [19, 21]                 |
|                                              |                                  | ↓Cardiac dysfunction                                               | 2.5; 18 mg/kg bw/day               | 2-10 weeks       | [12, 13, 15, 17, 18, 22] |
|                                              | ↑Left ventricular function       | 0.1-20 mg/kg bw/day                                                | 1-4 weeks                          | [23-26]          |                          |
|                                              | Swine                            | ↑Left ventricular function                                         | 5 mg/kg bw/day                     | 14 days          | [27]                     |
|                                              | Mouse                            | ↑SOD activity; ↑GPx-1                                              | 10-100 mg/kg bw/day                | 1; 2 weeks       | [28, 29]                 |
|                                              |                                  | ↑GSH                                                               | 10; 20 mg/kg bw/day                | 15 days          | [28]                     |
|                                              |                                  | ↑HO-1                                                              | 50 mg/kg bw (3 times/week)         | 21 days          | [30]                     |
|                                              |                                  | ↑eNOS; ↓NOX-2                                                      | 20 mg/kg bw/day                    | 4 weeks          | [31]                     |
|                                              | Rat                              | ↑GSH                                                               | 10; 30 mg/kg bw/day                | 10 days; 8 weeks | [34, 35]                 |
|                                              |                                  | ↑HO-1; ↓NOX-1; ↓NOX-2, ↓NOX-4; ↓Aortic O <sub>2</sub> <sup>-</sup> | 30 mg/kg (single dose)             | -                | [32]                     |
|                                              |                                  | ↑SOD activity                                                      | 5-30 mg/kg bw/day                  | 4-10 weeks       | [4, 35, 36]              |
|                                              |                                  | ↓MPO activity                                                      | 0.56-30 mg/kg bw/day               | 2h; 10 days      | [34, 37]                 |
|                                              |                                  | ↑Catalase activity                                                 | 10-100 mg/kg bw/day                | 7 days-8 weeks   | [29, 35, 36]             |
|                                              |                                  | ↓NO                                                                | 10 mg/kg bw/day                    | 8 weeks          | [30]                     |
|                                              |                                  | ↑NO                                                                | 5;50 mg/kg bw/day                  | 4; 10 weeks      | [4, 33]                  |
|                                              |                                  | ↑Endothelial relaxation                                            | 5-10 mg/kg bw/day; 50mg/L in water | 3-10 weeks       | [2, 4, 8, 38]            |
| ↑eNOS                                        |                                  | 5 mg/kg bw/day; 50mg/L in water                                    | 6-10 weeks                         | [2, 4, 8]        |                          |
| ↓Superoxide generation                       | 50 mg/kg bw/day; 50mg/L in water | 10; 12 weeks                                                       | [2, 10]                            |                  |                          |
| Myocardial infarction/Ischemia/Heart disease | Rat                              | ↓Mortality                                                         | 5 mg/kg bw/day                     | 4 weeks          | [39]                     |
|                                              |                                  | ↓Myocardial infarct size                                           | 1-5mg/kg bw/day                    | 7 days-4 weeks   | [25, 39-44]              |
|                                              |                                  | → Myocardial infarct size                                          | 17 mg/kg bw/day                    | 3 months         | [45]                     |
|                                              |                                  | ↓Acute myocardial ischemia/reperfusion                             | 0.1; 1mg/kg + insulin/day          | 5 days           | [41]                     |
|                                              |                                  | ↓Ventricular dysfunction                                           | 5 mg/kg bw/day                     | 2; 4 weeks       | [39, 42]                 |
|                                              |                                  | ↑Cardiac microenvironment                                          | 2.5 mg/kg bw/day                   | 1-8 weeks        | [46]                     |



|  |       |                                                                                                                                          |                  |           |      |
|--|-------|------------------------------------------------------------------------------------------------------------------------------------------|------------------|-----------|------|
|  |       | ↑Capillary density                                                                                                                       | 20 mg/kg bw/day  | 2 weeks   | [26] |
|  | Swine | ↑Tissue blood flow during stress; ↑Inferolateral function                                                                                | 100 mg/kg bw/day | 7 weeks   | [47] |
|  |       | ↓Aortic elastic fibers disruption and alteration; ↓Intima thickness; ↓Aortic accumulation of fatty cells and O <sub>2</sub> <sup>-</sup> | 8 mg/70kg bw/day | 12 months | [48] |

b.i.d., twice a day; bw, body weight; COX, cyclooxygenase; eNOS, endothelial nitric oxide synthase; GPx, glutathione peroxidase; GSH, glutathione; MPO, myeloperoxidase; NO, nitric oxide; SOD, superoxide dismutase; ↓, reduction; ↑, induction; →, no effect.

#### REFERENCES FOR SUPPLEMENTARY TABLE 6.

- Inanaga K, Ichiki T, Matsuura H, Miyazaki R, *et al.* Resveratrol attenuates angiotensin II-induced interleukin-6 expression and perivascular fibrosis. *Hypertens Res* 2009; 32: 466-71.
- Akar F, Uludağ O, Aydın A, Aytekin YA, *et al.* High-fructose corn syrup causes vascular dysfunction associated with metabolic disturbance in rats: protective effect of resveratrol. *Food Chem Toxicol* 2012; 50: 2135-41.
- Aubin MC, Lajoie C, Clement R, Gosselin H, *et al.* Female rats fed a high-fat diet were associated with vascular dysfunction and cardiac fibrosis in the absence of overt obesity and hyperlipidemia: therapeutic potential of resveratrol. *J Pharmacol Exp Ther* 2008; 325: 961-8.
- Bhatt SR, Lokhandwala MF, Banday AA. Resveratrol prevents endothelial nitric oxide synthase uncoupling and attenuates development of hypertension in spontaneously hypertensive rats. *Eur J Pharmacol* 2011; 667: 258-64.
- Biala A, Tauriainen E, Siltanen A, Shi J *et al.* Resveratrol induces mitochondrial biogenesis and ameliorates Ang II-induced cardiac remodeling in transgenic rats harboring human renin and angiotensinogen genes. *Blood Press* 2010; 19: 196-205.
- Chan V, Fenning A, Iyer A, Hoey A, *et al.* Resveratrol improves cardiovascular function in DOCA-salt hypertensive rats. *Curr Pharm Biotechnol* 2011; 12: 429-36.
- Chen C, Yang W, Xueding C, Qi Z, *et al.* Resveratrol downregulates acute pulmonary thromboembolism-induced pulmonary artery hypertension via p38 mitogen-activated protein kinase and monocyte chemoattractant protein-1 signaling in rats. *Life Sci* 2012; 90: 721-7.
- Miatello R, Vazquez M, Renna N, Cruzado M, *et al.* Chronic administration of resveratrol prevents biochemical cardiovascular changes in fructose-fed rats. *Am J Hypertens* 2005; 18: 864-70.
- Rivera L, Moron R, Zarzuelo A, Galisteo M. Long-term resveratrol administration reduces metabolic disturbances and lowers blood pressure in obese Zucker rats. *Biochem Pharmacol* 2009; 77: 1053-63.
- Subramanian M, Balasubramanian P, Garver H, Northcott C, Zhao *et al.* Chronic estradiol-17β exposure increases superoxide production in the rostral ventrolateral medulla and causes hypertension: reversal by resveratrol. *Am J Physiol Regul Integr Comp Physiol* 2011; 300: R1560-8.
- Behbahani J, Thandapilly SJ, Louis XL, Huang Y, Shao Z, *et al.* Resveratrol and small artery compliance and remodeling in the spontaneously hypertensive rat. *Am J Hypertens* 2010; 23: 1273-8.
- Louis XL, Thandapilly SJ, Mohankumar SK, Yu L, *et al.* Treatment with low-dose resveratrol reverses cardiac impairment in obese prone but not in obese resistant rats. *J Nutr Biochem* 2012; 23: 1163-9.
- Thandapilly SJ, Wojciechowski P, Behbahani J, Louis XL, *et al.* Resveratrol prevents the development of pathological cardiac hypertrophy and contractile dysfunction in the SHR without lowering blood pressure. *Am J Hypertens* 2010; 23: 192-6.
- Planavila A, Iglesias R, Giral M, Villarroya F. Sirt1 acts in association with PPARα to protect the heart from hypertrophy, metabolic dysregulation, and inflammation. *Cardiovasc Res* 2011; 90: 276-84.
- Wojciechowski P, Juric D, Louis XL, Thandapilly SJ, *et al.* Resveratrol arrests and regresses the development of pressure overload – but not volume overload-induced cardiac hypertrophy in rats. *J Nutr* 2010; 140: 962-8.
- Yang DL, Zhang HG, Xu YL, Gao YH, *et al.* Resveratrol inhibits right ventricular hypertrophy induced by monocrotaline in rats. *Clin Exp Pharmacol Physiol* 2010; 37: 150-5.
- Rimbaud S, Ruiz M, Piquereau J, Mateo P, *et al.* Resveratrol improves survival, hemodynamics and energetics in a rat model of hypertension leading to heart failure. *PLoS One* 2011; 6: e26391.
- Sulaiman M, Matta MJ, Sunderesan NR, Gupta MP, *et al.* Resveratrol, an activator of SIRT1, upregulates sarcoplasmic calcium ATPase and improves cardiac function in diabetic cardiomyopathy. *Am. J. Physiol. Heart Circ. Physiol.* 2010; 298: H833-43.
- Csiszar A, Labinsky N, Olson S, Pinto JT, *et al.* Resveratrol prevents monocrotaline-induced pulmonary hypertension in rats. *Hypertension* 2009; 54: 668-75.
- Paffett ML, Hesterman J, Candelaria G, Lucas S, *et al.* Longitudinal *In vivo* SPECT/CT Imaging Reveals Morphological Changes and Cardiopulmonary Apoptosis in a Rodent Model of Pulmonary Arterial Hypertension. *PLoS One* 2012; 7: e40910.
- Delucchi F, Berni R, Frati C, Cavalli S, Graiani *et al.* Resveratrol treatment reduces cardiac progenitor cell dysfunction and prevents morpho-functional ventricular remodeling in type-1 diabetic rats. *PLoS One* 2012; 7: e39836.
- Gurusamy N, Lekli I, Mukherjee S, Ray D, *et al.* Cardioprotection by resveratrol: a novel mechanism via autophagy involving the mTORC2 pathway. *Cardiovasc Res* 2010; 86: 103-12.
- Dolinsky VW, Chan AY, Robillard Frayne I, Light PE, *et al.* Resveratrol prevents the prohypertrophic effects of oxidative stress on LKB1. *Circulation* 2009; 119: 1643-52.
- Fukuda S, Kaga S, Zhan L, Bagchi D, *et al.* Resveratrol ameliorates myocardial damage by inducing vascular endothelial growth factor-angiogenesis and tyrosine kinase receptor Flk-1. *Cell Biochem Biophys* 2006; 44: 43-9.
- Lin JF, Lin SM, Chih CL, Nien MW, *et al.* Resveratrol reduces infarct size and improves ventricular function after myocardial ischemia in rats. *Life Sci* 2008; 83: 313–7.
- Penumathsa SV, Thirunavukkarasu M, Koneru S, Juhasz B, *et al.* Statin and resveratrol in combination induces cardioprotection against myocardial infarction in hypercholesterolemic rat. *J Mol Cell Cardiol* 2007; 42: 508-16.
- Al-Dissi AN, Weber LP. Resveratrol preserves cardiac function, but does not prevent endothelial dysfunction or pulmonary inflammation after environmental tobacco smoke exposure. *Food Chem Toxicol* 2011; 49: 1584-91.
- Ramar M, Manikandan B, Raman T, Priyadarsini A, *et al.* Protective effect of ferulic acid and resveratrol against alloxan-induced diabetes in mice. *Eur J Pharmacol* 2012; 690:226-35.
- Xia N, Daiber A, Habermeier A, Closs EI, *et al.* Resveratrol reverses endothelial nitric-oxide synthase uncoupling in apolipoprotein E knockout mice. *J Pharmacol Exp Ther* 2010; 335: 149-54.
- Kim JW, Lim SC, Lee MY, Lee JW, *et al.* Inhibition of neointimal formation by trans-resveratrol: role of phosphatidylinositol 3- kinase-dependent Nrf2 activation in heme oxygenase-1 induction. *Mol Nutr Food Res* 2010; 54: 1497-505.

- [31] Zhang H, Zhang J, Ungvari Z, Zhang C. Resveratrol improves endothelial function: role of TNF(alpha) and vascular oxidative stress. *Arterioscler Thromb Vasc Biol* 2009; 29: 1164-71.
- [32] Yu HP, Hwang TL, Yen CH, Lau YT. Resveratrol prevents endothelial dysfunction and aortic superoxide production after trauma hemorrhage through estrogen receptor-dependent hemoxygenase-1 pathway. *Crit Care Med* 2010; 38: 1147-54.
- [33] Liu Z, Song Y, Zhang X, Zhang W, *et al.* Effects of trans-resveratrol on hypertension-induced cardiac hypertrophy using the partially nephrectomized rat model. *Clin Exp Pharmacol Physiol* 2005; 32: 1049-54.
- [34] Alturfan AA, Tozan-Beceren A, Sehirli AO, Demiralp E, *et al.* Resveratrol ameliorates oxidative DNA damage and protects against acrylamide-induced oxidative stress in rats. *Mol Biol Rep* 2012; 39: 4589-96.
- [35] Bagul PK, Middela H, Matapally S, Padiya R, *et al.* Attenuation of insulin resistance, metabolic syndrome and hepatic oxidative stress by resveratrol in fructose-fed rats. *Pharmacol Res* 2012; 66: 260-8.
- [36] Franco JG, Lisboa PC, Lima NS, Amaral TA, *et al.* Resveratrol attenuates oxidative stress and prevents steatosis and hypertension in obese rats programmed by early weaning. *J Nutr Biochem* 2012; doi.org/10.1016/j.jnutbio.2012.06.019.
- [37] Petrat F, de Groot H. Protection against severe intestinal ischemia/reperfusion injury in rats by intravenous resveratrol. *J Surg Res.* 2011; 167: e145-55.
- [38] Mizutani K, Ikeda K, Kawai Y, Yamori Y. Resveratrol attenuates ovariectomy-induced hypertension and bone loss in stroke-prone spontaneously hypertensive rats. *J. Nutr. Sci. Vitaminol* 2000; 46: 78-83.
- [39] Chen YR, Yi FF, Li XY, Wang CY, *et al.* Resveratrol attenuates ventricular arrhythmias and improves the long-term survival in rats with myocardial infarction. *Cardiovasc Drugs Ther* 2008; 22: 479-85.
- [40] Das S, Tosaki A, Bagchi D, Maulik N, *et al.* Potentiation of a survival signal in the ischemic heart by resveratrol through p38 mitogen-activated protein kinase/mitogen- and stress-activated protein kinase 1/cAMP response element-binding protein signaling. *J Pharmacol Exp Ther* 2006; 317: 980-8.
- [41] Huang JP, Huang SS, Deng JY, Chang CC, *et al.* Insulin and resveratrol act synergistically, preventing cardiac dysfunction in diabetes, but the advantage of resveratrol in diabetics with acute heart attack is antagonized by insulin. *Free Radic Biol Med* 2010; 49: 1710-21.
- [42] Lekli I, Szabo G, Juhasz B, Das S, *et al.* Protective mechanisms of resveratrol against ischemia/reperfusion-induced damage in hearts obtained from Zucker obese rats: the role of GLUT-4 and endothelin. *Am J Physiol Heart Circ Physiol* 2007; 294: H859-66.
- [43] Mukherjee S, Lekli I, Gurusamy N, Bertelli AA, *et al.* Expression of the longevity proteins by both red and white wines and their cardioprotective components, resveratrol, tyrosol, and hydroxytyrosol. *Free Radic Biol Med* 2009; 46: 573-8.
- [44] Thirunavukkarasu M, Penumathsa SV, Koneru S, Juhasz B, *et al.* Resveratrol alleviates cardiac dysfunction in streptozotocin-induced diabetes: Role of nitric oxide, thioredoxin, and heme oxygenase. *Free Radic Biol Med* 2007; 43: 720-9.
- [45] Burstein B, Maguy A, Clement R, Gosselin H, *et al.* Effects of resveratrol (*trans*-3,5,4'-trihydroxystilbene) treatment on cardiac remodelling following myocardial infarction. *J Pharmacol Exp Ther* 2007; 323: 916-23.
- [46] Delucchi F, Berni R, Frati C, Cavalli S, *et al.* Resveratrol treatment reduces cardiac progenitor cell dysfunction and prevents morpho-functional ventricular remodeling in type-1 diabetic rats. *PLoS One* 2012; 7: e39836.
- [47] Robich MP, Osipov RM, Nezafat R, Feng J, *et al.* Resveratrol improves myocardial perfusion in a swine model of hypercholesterolemia and chronic myocardial ischemia. *Circulation* 2010; 122: S142-9.
- [48] Azorín-Ortuño M, Yañez-Gascón MJ, Pallarés FJ, Rivera J, *et al.* A dietary resveratrol-rich grape extract prevents the developing of atherosclerotic lesions in the aorta of pigs fed an atherogenic diet. *J Agric Food Chem* 2012; 60: 5609-20.

**Supplementary Table 7. Resveratrol-exposure effects on insulin, glucose and lipid levels of animal models of obesity, diabetes and metabolic dysfunction.**

| Model                                  | Animal Model             | Effect                                                  | Treatment                     | Duration         | Reference                |
|----------------------------------------|--------------------------|---------------------------------------------------------|-------------------------------|------------------|--------------------------|
| Obesity/Diabetes/Metabolic dysfunction | Mouse                    | ↓Insulin                                                | ~80 ng/day-50 mg/kg bw b.i.d. | 2 weeks-6 months | [1-4]                    |
|                                        |                          | ↑Insulin sensitivity                                    | ~2.5-400 mg/kg bw/day         | 8-20 weeks       | [5-7]                    |
|                                        |                          | → Insulin sensitivity (AMPK $\alpha$ 1 <sup>-/-</sup> ) | 400 mg/kg bw/day              | 12 weeks         | [8]                      |
|                                        | Rat                      | ↓Insulin                                                | 5-100 mg/kg bw/day            | 4-10 weeks       | [9-11]                   |
|                                        |                          | ↑Insulin                                                | 2.5 mg/kg bw/day              | 5 weeks          | [12]                     |
|                                        |                          | ↑Insulin sensitivity                                    | 10-300 mg/kg bw/day           | 8-10 weeks       | [11, 13, 14]             |
|                                        | Swine                    | ↑Insulin sensitivity                                    | 100 mg/kg bw/day              | 11 weeks         | [15]                     |
|                                        | Lemur                    | ↑Insulin sensitivity                                    | 200 mg/kg bw/day              | 33 months        | [16]                     |
|                                        | Rabbit                   | ↓Insulin; → Glucose                                     | ~1.5; 17 mg/kg bw/day         | 10 weeks         | [17]                     |
|                                        | Mouse                    | ↓Glucose                                                | ~80 ng/day-400 mg/kg bw/day   | 2 weeks-1 year   | [1-4, 18-20]             |
|                                        | Lemur                    | ↓Glucose                                                | 200 mg/kg bw/day              | 33 months        | [16]                     |
|                                        | Rat                      | ↓Glucose                                                | 0.1-10 mg/kg bw/day           | 1-8 weeks        | [9, 10, 12, 14, 21-23]   |
|                                        |                          | → Glucose                                               | 2.5 mg/kg bw/day              | 1-8 weeks        | [24]                     |
|                                        | Mouse                    | ↓Total-chole; ↓Triglycerides; ↓FFA                      | ~7-400 mg/kg bw/day           | 6; 10 weeks      | [18, 20]                 |
|                                        |                          | ↓ApoB/ApoA1; ↑Adiponectin                               | ~7; 30 mg/kg bw/day           | 6 weeks          | [18]                     |
|                                        |                          | ↓Grade of steatosis                                     | 200 mg/kg bw/day              | 20 weeks         | [6]                      |
|                                        | Rat                      | ↓Triglycerides                                          | 2.5-30 mg/kg bw/day           | 4-10 weeks       | [10, 12, 14, 17, 25, 26] |
|                                        |                          | ↓FFA                                                    | 10 mg/kg bw/day               | 8 weeks          | [10]                     |
|                                        |                          | ↑HDL-chole                                              | 2.5-15 mg/kg bw/day           | 4-8 weeks        | [12, 26, 27]             |
|                                        |                          | ↓LDL-chole                                              | 2.5; 10 mg/kg bw/day          | 4-8 weeks        | [12, 26]                 |
|                                        |                          | ↓Total chol                                             | 10-45 mg/kg bw/day            | 6-8 weeks        | [10, 27]                 |
|                                        |                          | ↓Grade of steatosis                                     | 15-44 mg/kg bw/day            | 4-6 weeks        | [25, 27, 28]             |
|                                        |                          | ↓Abdominal fat                                          | 10; 100 mg/kg bw/day          | 8-10 weeks       | [10, 11]                 |
| ↓White adipose tissue size             | 6, 30, 60 mg/kg bw/day   | 6 weeks                                                 | [29]                          |                  |                          |
| Swine                                  | ↓LDL; ↓Total cholesterol | 100 mg/kg bw/day                                        | 7-11 weeks                    | [15, 19]         |                          |
| Mouse                                  | ↓Metabolic dysregulation | 400 mg/kg bw/day                                        | 12 weeks                      | [8]              |                          |
| Rat                                    | ↓Metabolic dysregulation | 1; 50 mg/kg bw/day                                      | 5 days-15 weeks               | [30, 31]         |                          |

AMPK, AMP activated protein kinase; Apo, apolipoprotein; b.i.d., twice a day; bw, body weight; chol, cholesterol; FFA, free fatty acids; HDL, high density lipoprotein; LDL, low-density lipoprotein; ↓, reduction; ↑, induction; →, no effect.

**REFERENCES FOR SUPPLEMENTARY TABLE 7.**

- [1] Baur JA, Pearson KJ, Price NL, Jamieson HA, *et al.* Resveratrol improves health and survival of mice on a high-calorie diet. *Nature* 2006; 444: 337-42.
- [2] Kang W, Hong HJ, Guan J, Kim DG, *et al.* Resveratrol improves insulin signaling in a tissue-specific manner under insulin-resistant conditions only: *in vitro* and *in vivo* experiments in rodents. *Metabolism* 2012; 61: 424-33.
- [3] Ramadori G, Gautron L, Fujikawa T, Vianna CR, *et al.* Central administration of resveratrol improves diet-induced diabetes. *Endocrinology* 2009; 150: 5326-33.
- [4] Sharma S, Misra CS, Arumugam S, Roy S, *et al.* Antidiabetic activity of resveratrol, a known SIRT1 activator in a genetic model for type-2 diabetes. *Phytother Res* 2011; 25: 67-73.
- [5] Gonzalez-Rodriguez A, Mas Gutierrez JA, Sanz-Gonzalez S, Ros M, *et al.* Inhibition of PTP1B restores IRS1-mediated hepatic insulin signaling in IRS2-deficient mice. *Diabetes* 2010; 59: 588-99.

- [6] Jeon BT, Jeong EA, Shin HJ, Lee Y, *et al.* Resveratrol attenuates obesity-associated peripheral and central inflammation and improves memory deficit in mice fed a high-fat diet. *Diabetes* 2012; 61: 1444-54.
- [7] Lagouge M, Argmann C, Gerhart-Hines Z, Meziane H, *et al.* Resveratrol improves mitochondrial function and protects against metabolic disease by activating SIRT1 and PGC-1 $\alpha$ . *Cell* 2006; 127: 1109-22.
- [8] Um JH, Park SJ, Kang H, Yang S, *et al.* AMP-activated protein kinase-deficient mice are resistant to the metabolic effects of resveratrol. *Diabetes* 2010; 59: 554-63.
- [9] Palsamy P, Subramanian S. Resveratrol, a natural phytoalexin, normalizes hyperglycemia in streptozotocin-nicotinamide induced experimental diabetic rats. *Biomed Pharmacother* 2008; 62: 598-605.
- [10] Rivera L, Moron R, Zarzuelo A, Galisteo M Long-term resveratrol administration reduces metabolic disturbances and lowers blood pressure in obese Zucker rats. *Biochem Pharmacol* 2009; 77: 1053-63.
- [11] Shang J, Chen LL, Xiao FX, Sun H, *et al.* Resveratrol improves non-alcoholic fatty liver disease by activating AMP-activated protein kinase. *Acta Pharmacol Sin* 2008; 29: 698-706.
- [12] Louis XL, Thandapilly SJ, Mohankumar SK, Yu L, *et al.* Treatment with low-dose resveratrol reverses cardiac impairment in obese prone but not in obese resistant rats. *J Nutr Biochem* 2012; 23:1163-9.
- [13] Andersen G, Burkon A, Sulzmaier FJ, Walker JM, *et al.* High dose of dietary resveratrol enhances insulin sensitivity in healthy rats but does not lead to metabolite concentrations effective for SIRT1 expression. *Mol Nutr Food Res* 2011; 55: 1197-206.
- [14] Bagul PK, Middela H, Matapally S, Padiya R, *et al.* Attenuation of insulin resistance, metabolic syndrome and hepatic oxidative stress by resveratrol in fructose-fed rats. *Pharmacol Res* 2012; 66: 260-8.
- [15] Robich MP, Osipov RM, Chu LM, Han Y, *et al.* Resveratrol modifies risk factors for coronary artery disease in swine with metabolic syndrome and myocardial ischemia. *Eur J Pharmacol* 2011; 664: 45-53.
- [16] Marchal J, Blanc S, Epelbaum J, Aujard F, *et al.* Effects of chronic calorie restriction or dietary resveratrol supplementation on insulin sensitivity markers in a primate, *Microcebus murinus*. *PLoS One* 2012; 7: e34289.
- [17] Akar F, Uludağ O, Aydın A, Aytekin YA, *et al.* High-fructose corn syrup causes vascular dysfunction associated with metabolic disturbance in rats: protective effect of resveratrol. *Food Chem Toxicol* 2012; 50: 2135-41.
- [18] Do GM, Jung UJ, Park HJ, Kwon EY, *et al.* Resveratrol ameliorates diabetes-related metabolic changes via activation of AMP-activated protein kinase and its downstream targets in db/db mice. *Mol Nutr Food Res* 2012; 56: 1282-91.
- [19] Kim YH, Kim YS, Kang SS, Cho GJ *et al.* Resveratrol inhibits neuronal apoptosis and elevated Ca<sup>2+</sup>/calmodulin-dependent protein kinase II activity in diabetic mouse retina. *Diabetes* 2010; 59: 1825-35.
- [20] Kim S, Jin Y, Choi Y, Park T. Resveratrol exerts anti-obesity effects via mechanisms involving down-regulation of adipogenic and inflammatory processes in mice. *Biochem Pharmacol* 2011; 81: 1343-51.
- [21] Huang JP, Huang SS, Deng JY, Chang CC, *et al.* Insulin and resveratrol act synergistically, preventing cardiac dysfunction in diabetes, but the advantage of resveratrol in diabetics with acute heart attack is antagonized by insulin. *Free Radic Biol Med* 2010; 49: 1710-21.
- [22] Rocha KK, Souza GA, Ebaid GX, Seiva FR, *et al.* Resveratrol toxicity: effects on risk factors for atherosclerosis and hepatic oxidative stress in standard and high-fat diets. *Food Chem Toxicol* 2009; 47: 1362-7.
- [23] Thirunavukkarasu M, Penumathsa SV, Koneru S, Juhasz B, *et al.* Resveratrol alleviates cardiac dysfunction in streptozotocin-induced diabetes: Role of nitric oxide, thioredoxin, and heme oxygenase. *Free Radic Biol Med* 2007; 43: 720-9.
- [24] Delucchi F, Berni R, Frati C, Cavalli S, *et al.* Resveratrol treatment reduces cardiac progenitor cell dysfunction and prevents morpho-functional ventricular remodeling in type-1 diabetic rats. *PLoS One* 2012; 7: e39836.
- [25] Franco JG, Lisboa PC, Lima NS, Amaral TA, *et al.* Resveratrol attenuates oxidative stress and prevents steatosis and hypertension in obese rats programmed by early weaning. *J Nutr Biochem* 2012; Epub ahead of print. doi.org/10.1016/j.jnutbio.2012.06.019.
- [26] Roghani M, Baluchnejadmojarad T. Mechanisms underlying vascular effect of chronic resveratrol in streptozotocin-diabetic rats. *Phytother Res* 2010; 24 Suppl 2: S148-54.
- [27] Gómez-Zorita S, Fernández-Quintela A, Macarulla MT, Aguirre L, *et al.* Resveratrol attenuates steatosis in obese Zucker rats by decreasing fatty acid availability and reducing oxidative stress. *Br J Nutr* 2012; 107: 202-10.
- [28] Bujanda L, Hijona E, Larzabal M, Beraza M, *et al.* Resveratrol inhibits nonalcoholic fatty liver disease in rats. *BMC Gastroenterol* 2008; 8: 40.
- [29] Macarulla MT, Alberdi G, Gomez S, Tueros I, *et al.* Effects of different doses of resveratrol on body fat and serum parameters in rats fed a hypercaloric diet. *J Physiol Biochem* 2009; 65: 369-76.
- [30] Deng JY, Hsieh PS, Huang JP, Lu LS, *et al.* Activation of estrogen receptor is crucial for resveratrol-stimulating muscular glucose uptake via both insulin-dependent and -independent pathways. *Diabetes* 2008; 57: 1814-23.
- [31] Planavila A, Iglesias R, Giralt M, Villarroya F. Sirt1 acts in association with PPAR $\alpha$  to protect the heart from hypertrophy, metabolic dysregulation, and inflammation. *Cardiovasc Res* 2011; 90: 276-84.

Supplementary Table 8. Anti-inflammatory targets/mechanisms of resveratrol in animal models.

| Animal Model             | Effects and Mechanisms                                                                                                             | Treatment                           | Duration         | Reference        |
|--------------------------|------------------------------------------------------------------------------------------------------------------------------------|-------------------------------------|------------------|------------------|
| Mouse                    | ↓TNF $\alpha$                                                                                                                      | ~3-100 mg/kg bw/day                 | 14-62 days       | [1-8]            |
|                          | → TNF $\alpha$                                                                                                                     | 500, 1000, 1500 mg/kg bw/day        | 10 days          | [9]              |
|                          | ↓IFN $\gamma$                                                                                                                      | 10-100 mg/kg bw/day                 | 14-62 days       | [1,6,7]          |
|                          | ↓CRP                                                                                                                               | 20; 40 mg/kg bw/day                 | 20 days          | [2]              |
|                          | ↓IL-6                                                                                                                              | ~2-50 mg/kg bw/day                  | 14 days-4 weeks  | [6,10-12]        |
|                          | ↑IL-6                                                                                                                              | 10 mg/kg bw/day                     | 30 days          | [4]              |
|                          | ↑IL-3; ↓sTNF RI, p55 subunit; ↓IL-6; ↓MIP; ↓MIG; ↓MPO                                                                              | 2.1 mg/kg bw/day                    | 29 days          | [11]             |
|                          | ↑IL-10; ↓PGES-1                                                                                                                    | ~3 mg/kg bw/day                     | 26 days          | [3]              |
|                          | ↓IL-1 $\beta$                                                                                                                      | ~3-100 mg/kg bw/day                 | 14-30 days       | [3,4,6]          |
|                          | ↓COX-2; ↓iNOS                                                                                                                      | ~3-100 mg/kg bw/day                 | 14-26 days       | [3,6]            |
|                          | ↓IL-8                                                                                                                              | 30; 60 mg/kg bw/day                 | 14 days          | [7]              |
|                          | ↓Recruitment of leukocytes; ↓IL-4; ↓IL-5                                                                                           | 30 mg/kg bw/day                     | 32 days          | [13]             |
|                          | ↓MIP1a; ↓MCP-1                                                                                                                     | 100 mg/kg bw/day; P183/1-mixture    | 32 days; 8 weeks | [14,15]          |
|                          | ↓IL12p40; ↓IL13; ↑IL17; ↑G-CSF; ↓RANTES                                                                                            | 100 mg/kg bw/day                    | 32 days          | [15]             |
|                          | ↓ODC; ↓COX                                                                                                                         | 25 mol in 200 $\mu$ L acetone/mouse | -                | [16]             |
|                          | ↓NF- $\kappa$ B                                                                                                                    | 10, 20 mg/kg bw/day                 | 15 days          | [17]             |
|                          | ↓ICAM-1; ↓VCAM-1; ↓hepatic HMG-CoA reductase activity                                                                              | 0.02, 0.06% w/w in chow             | 20 weeks         | [18]             |
|                          | ↑AMPK activation                                                                                                                   | ~7-30 mg/kg bw/day                  | 6 weeks          | [19]             |
| ↓Macrophage infiltration | 200 mg/kg bw/day                                                                                                                   | 20 weeks                            | [20]             |                  |
| Rat                      | ↓TNF $\alpha$                                                                                                                      | 5~44 mg/kg bw/day                   | 5 days-8 weeks   | [21-29]          |
|                          | ↓NF- $\kappa$ Bp65                                                                                                                 | 10; 20 mg/kg bw/day                 | 2-10 weeks       | [23,24,30]       |
|                          | ↓COX-2                                                                                                                             | 8-40 mg/kg bw/day                   | 2-15/30 weeks    | [24,31]          |
|                          | ↑PGE2                                                                                                                              | 10 mg/kg bw/day                     | 2 weeks          | [24]             |
|                          | ↓PGE2; ↓PGES-1; ↓NO; ↓COX-2; ↓infiltration of inflammatory cells; 2,655 genes in distal colon mucosa were differentially regulated | 1 mg/kg bw/day                      | 25 days          | [25]             |
|                          | ↓IL-1 $\beta$                                                                                                                      | 5-10 mg/kg bw/day                   | 7-30 days        | [21,26,27,29]    |
|                          | ↓iNOS                                                                                                                              | 10-25 mg/kg bw/day                  | ~1 week          | [26,33]          |
|                          | ↓IL-6                                                                                                                              | 5-25 mg/kg bw/day                   | ~1 week-4 weeks  | [21,23,27,29,33] |
|                          | mRNA: ↓IL-6; ↓IL-1; ↓TNF $\alpha$ ; ↓PDGF $\alpha$ ; ↓PDGF $\beta$ ; ↓MCP-1                                                        | 25 mg/kg bw/day                     | 14 or 21 days    | [34]             |
|                          | ↓IL-1; ↓ICAM1                                                                                                                      | 25 mg/kg bw/day                     | ~1 week          | [33]             |
|                          | ↑AMPK activation                                                                                                                   | 2.5 mg/kg bw/day                    | 2 weeks          | [35]             |
|                          | ↓PPAR $\alpha$ expression                                                                                                          | 18 mg/kg/day                        | 8 weeks          | [36]             |
|                          | ↑Sirt 1                                                                                                                            | 300 mg/kg bw/day; 50 mL/L in water  | 8; 10 weeks      | [37,38]          |

|        |                                  |                 |          |      |
|--------|----------------------------------|-----------------|----------|------|
|        | ↓TGFβ                            | 10 mg/kg bw/day | 2 weeks  | [29] |
| Rabbit | ↑Platelet aggregation inhibition | 4 mg/kg bw/day  | 12 weeks | [39] |

AMPK, AMP activated protein kinase; b.i.d., twice a day; bw, body weight; COX, cyclooxygenase; CRP, C-reactive protein; eNOS, endothelial nitric oxide synthase; G-CSF, granulocyte colony-stimulating factor; IL, interleukin; iNOS, inducible nitric oxide synthase; MCP, monocyte chemoattractant protein; MIP, macrophage inflammatory protein; MIG, IFN $\gamma$ -inducible T cell chemoattractant monokine; MPO, myeloperoxidase; NF- $\kappa$ B, nuclear factor- $\kappa$ B-binding; NO, nitric oxide; ODC, colonic mucosal ornithine decarboxylase; PGE<sub>2</sub>, prostaglandin E<sub>2</sub>; PGES-1, prostaglandin E synthase 1; sTNFR1, soluble Tumor Necrosis Factor Receptor I; TNF, tumor necrosis factor; ↓, reduction; ↑, induction; →, no effect.

#### REFERENCES FOR SUPPLEMENTARY TABLE 8.

- [1] Cui X, Jin Y, Hofseth AB, Pena E, Habiger J *et al.* Resveratrol suppresses colitis and colon cancer associated with colitis. *Cancer Prev Res* 2010; 3: 549-59.
- [2] El-Mowafy AM, El-Mesery ME, Salem HA, Al-Gayyar MM, *et al.* Prominent chemopreventive and chemoenhancing effects for resveratrol: unraveling molecular targets and the role of C-reactive protein. *Chemotherapy* 2010; 56: 60-5.
- [3] Sanchez-Fidalgo S, Cardeno A, Villegas I, Talero E, *et al.* Dietary supplementation of resveratrol attenuates chronic colonic inflammation in mice. *Eur J Pharmacol* 2010; 633: 78-84.
- [4] Sehirli O, Tozan A, Omurtag GZ, Cetinel S, *et al.* Protective effect of resveratrol against naphthalene-induced oxidative stress in mice. *Ecotoxicol Environ Saf* 2008; 71: 301-8.
- [5] Sharma S, Chopra K, Kulkarni SK. Effect of insulin and its combination with resveratrol or curcumin in attenuation of diabetic neuropathic pain: participation of nitric oxide and TNF-alpha. *Phytother Res* 2007; 21: 278-83.
- [6] Singh UP, Singh NP, Singh B, Hofseth LJ, *et al.* Resveratrol (trans-3,5,49-trihydroxystilbene) induces silent mating type information regulation-1 and down-regulates nuclear transcription factor-kappaB activation to abrogate dextran sulfate sodium-induced colitis. *J Pharmacol Exp Ther* 2010; 332: 829-39.
- [7] Yao J, Wang JY, Liu L, Li YX, *et al.* Anti-oxidant effects of resveratrol on mice with DSS-induced ulcerative colitis. *Arch Med Res* 2010; 41: 288-94.
- [8] Zhang H, Morgan B, Potter BJ, Ma L, *et al.* Resveratrol improves left ventricular diastolic relaxation in type 2 diabetes by inhibiting oxidative/nitrate stress. *Am J Physiol Heart Circ Physiol* 2010; 299: H985-94.
- [9] Liu HS, Pan CE, Yang W, Liu XM. Antitumor and immunomodulatory activity of resveratrol on experimentally implanted tumor of H22 in Balb/c mice. *World J Gastroenterol* 2003; 9: 1474-6.
- [10] Inanaga K, Ichiki T, Matsuura H, Miyazaki R, *et al.* Resveratrol attenuates angiotensin II-induced interleukin-6 expression and perivascular fibrosis. *Hypertens Res* 2009; 32: 466-71.
- [11] Larrosa M, Tome-Carneiro J, Yanez-Gascon MJ, Alcantara D, *et al.* Preventive oral treatment with resveratrol pro-prodrugs drastically reduce colon inflammation in rodents. *J Med Chem* 2010; 53: 7365-76.
- [12] Li T, Fan GX, Wang W, Li T, Yuan YK. Resveratrol induces apoptosis, influences IL-6 and exerts immunomodulatory effect on mouse lymphocytic leukemia both *in vitro* and *in vivo*. *Int Immunopharmacol* 2007; 7: 1221-31.
- [13] Lee M, Kim S, Kwon OK, Oh SR, *et al.* Anti-inflammatory and anti-asthmatic effects of resveratrol, a polyphenolic stilbene, in a mouse model of allergic asthma. *Int Immunopharmacol* 2009; 9: 418-24.
- [14] Norata GD, Marchesi P, Passamonti S, Pirillo A, *et al.* Anti-inflammatory and anti-atherogenic effects of catechin, caffeic acid and trans-resveratrol in apolipoprotein E deficient mice. *Atherosclerosis*. 2007; 191: 265-71.
- [15] Singh NP, Hegde VL, Hofseth LJ, Nagarkatti M, *et al.* Resveratrol (trans-3,5,4'-trihydroxystilbene) ameliorates experimental allergic encephalomyelitis, primarily via induction of apoptosis in T cells involving activation of aryl hydrocarbon receptor and estrogen receptor. *Mol Pharmacol* 2007; 72: 1508-21.
- [16] Afaq F, Adhami VM, Ahmad N. Prevention of short-term ultraviolet B radiation-mediated damages by resveratrol in SKH-1 hairless mice. *Toxicol Appl Pharmacol* 2003; 186: 28-37.
- [17] Ramar M, Manikandan B, Raman T, Priyadarsini A, *et al.* Protective effect of ferulic acid and resveratrol against alloxan-induced diabetes in mice. *Eur J Pharmacol* 2012; 690: 226-35.
- [18] Do GM, Jung UJ, Park HJ, Kwon EY, *et al.* Resveratrol ameliorates diabetes-related metabolic changes via activation of AMP-activated protein kinase and its downstream targets in db/db mice. *Mol Nutr Food Res* 2012; 56: 1282-91.
- [19] Do GM, Kwon EY, Kim HJ, Jeon SM, *et al.* Long-term effects of resveratrol supplementation on suppression of atherogenic lesion formation and cholesterol synthesis in apo E-deficient mice. *Biochem Biophys Res Commun* 2008; 374: 55-9.
- [20] Jeon BT, Jeong EA, Shin HJ, Lee Y, Lee DH, *et al.* Resveratrol attenuates obesity-associated peripheral and central inflammation and improves memory deficit in mice fed a high-fat diet. *Diabetes* 2012; 61: 1444-54.
- [21] Ara C, Kirimlioglu H, Karabulut AB, Coban S, *et al.* Protective effect of resveratrol against oxidative stress in cholestasis. *J Surg Res*. 2005; 127: 112-7.
- [22] Bujanda L, Hijona E, Larzabal M, Beraza M, *et al.* Resveratrol inhibits nonalcoholic fatty liver disease in rats. *BMC Gastroenterol* 2008; 8: 40.
- [23] Kumar P, Padi SS, Naidu PS, Kumar A. Effect of resveratrol on 3- nitropropionic acid-induced biochemical and behavioural changes: possible neuro-protective mechanisms. *Behav Pharmacol* 2006; 17: 485-92.
- [24] Martin AR, Villegas I, Sanchez-Hidalgo M, de la Lastra CA. The effects of resveratrol, a phytoalexin derived from red wines, on chronic inflammation induced in an experimentally induced colitis model. *Br J Pharmacol* 2006; 147: 873-85.
- [25] Larrosa M, Yanez-Gascon MJ, Selma MV, Gonzalez-Sarrias A, *et al.* Effect of a low dose of dietary resveratrol on colon microbiota, inflammation and tissue damage in a DSS-induced colitis rat model. *J Agric Food Chem* 2009; 57: 2211-20.
- [26] Hong SW, Jung KH, Zheng HM, Lee HS, *et al.* The protective effect of resveratrol on dimethylnitrosamine-induced liver fibrosis in rats. *Arch Pharm Res* 2010; 33: 601-9.
- [27] Palsamy P, Subramanian S. Ameliorative potential of resveratrol on proinflammatory cytokines, hyperglycemia mediated oxidative stress, and pancreatic beta-cell dysfunction in streptozotocin-nicotinamide-induced diabetic rats. *J Cell Physiol* 2010; 224: 423-32.
- [28] Rivera L, Moron R, Zarzuelo A, Galisteo M. Long-term resveratrol administration reduces metabolic disturbances and lowers blood pressure in obese Zucker rats. *Biochem Pharmacol* 2009; 77: 1053-63.
- [29] Sener G, Topaloglu N, Ozer SA, Ercan F, *et al.* Resveratrol alleviates bleomycin-induced lung injury in rats. *Pulm Pharmacol Ther* 2007; 20: 642-9.
- [30] Tunali-Akbay T, Sehirli O, Ercan F, Sener G. Resveratrol protects against methotrexate-induced hepatic injury in rats. *J Pharm Pharm Sci* 2010; 13: 303-10.
- [31] Jin F, Wu Q, Lu YF, Gong QH, *et al.* Neuroprotective effect of resveratrol on 6-OHDA-induced Parkinson's disease in rats. *Eur J Pharmacol* 2008; 600: 78-82.
- [32] Sengottavelan M, Deeptha K, Nalini N. Influence of dietary resveratrol on early and late molecular markers of 1,2-dimethylhydrazine-induced colon carcinogenesis. *Nutrition* 2009; 25: 1169-76.

- [33] Csiszar A, Labinskyy N, Podlutzky A, Kaminski PM, *et al.* Vasoprotective effects of resveratrol and SIRT1: attenuation of cigarette smoke-induced oxidative stress and proinflammatory phenotypic alterations. *Am J Physiol Heart Circ Physiol* 2008; 294: H2721-35.
- [34] Csiszar A, Labinskyy N, Olson S, Pinto JT, *et al.* Resveratrol prevents monocrotaline-induced pulmonary hypertension in rats. *Hypertension* 2009; 54: 668-75.
- [35] Dolinsky VW, Chan AY, Robillard Frayne I, Light PE, *et al.* Resveratrol prevents the prohypertrophic effects of oxidative stress on LKB1. *Circulation* 2009; 119: 1643-52.
- [36] Rimbaud S, Ruiz M, Piquereau J, Mateo P, *et al.* Resveratrol improves survival, hemodynamics and energetics in a rat model of hypertension leading to heart failure. *PLoS One* 2011; 6: e26391.
- [37] Akar F, Uludağ O, Aydın A, Aytekin YA, *et al.* High-fructose corn syrup causes vascular dysfunction associated with metabolic disturbance in rats: protective effect of resveratrol. *Food Chem Toxicol* 2012; 50: 2135-41.
- [38] Andersen G, Burkon A, Sulzmaier FJ, Walker JM, *et al.* High dose of dietary resveratrol enhances insulin sensitivity in healthy rats but does not lead to metabolite concentrations effective for SIRT1 expression. *Mol Nutr Food Res* 2011; 55: 1197-206.
- [39] Wang Z, Huang Y, Zou J, Cao K, *et al.* Effects of red wine and wine polyphenol resveratrol on platelet aggregation *in vivo* and *in vitro*. *Int J Mol Med* 2002; 9: 77-9.

Supplementary Table 9. Neuroprotective effects of resveratrol in animal models.

| Neurodegenerative Model                  | Animal Model                                                   | Treatment                                                                                                             | Effects and Mechanisms                                                                                                                                                                                                       | Reference |
|------------------------------------------|----------------------------------------------------------------|-----------------------------------------------------------------------------------------------------------------------|------------------------------------------------------------------------------------------------------------------------------------------------------------------------------------------------------------------------------|-----------|
| Parkinson                                | Male Swiss mice exposed to paraquat/ maneb                     | 10 mg/kg bw/day (ip) / 9 weeks                                                                                        | ↑TH/Neu positive cells; ↓Fluoro-Jade B-positive neurons; ↑Dopamine levels; ↑VMAT-2 expression; ↓TNF $\alpha$ , IL-1 $\beta$<br>↓MT-III; ↓p-p53, Bax; ↑ cyp2d22 expression; ↓NF- $\kappa$ B activation; ↓ASK-1, p38MAPK, HO-1 | [1]       |
|                                          | Transgenic mice overexpressing PGC- $\alpha$ treated with MPTP | 20 mg/kg (ip) / 24h                                                                                                   | ↓dopaminergic neurons cell death; ↑TH, DAT in SNc; ↑SOD, SOD2, Trx2; PGC- $\alpha$                                                                                                                                           | [2]       |
|                                          | Male Wistar rats injected of 6-OHDA                            | 20 mg/kg (po) / 2 weeks                                                                                               | ↓rotating frequency behavior; ↑dopaminergic and nigral cell survival; ↓ROS; ↑T-AOC                                                                                                                                           | [3]       |
|                                          | Male Wistar rats injected of 6-OHDA                            | Pretreatment 20 mg/kg bw/day (ip) / 15 days                                                                           | ↓circling behavior; ↑muscular coordination; ↓TBARS, PC; ↑GSH; ↑Na $^{+}$ /K $^{+}$ -ATPase activity; ↑Dopamine and DOPAC; ↓DA-D2 receptor binding; ↑TH; ↓COX-2; ↓PLA2 activity                                               | [4]       |
|                                          | Sprague–Dawley injected of 6-OHDA                              | 10, 20, 40 mg/kg bw/day (po) / 10 weeks                                                                               | ↓circling behavioral; ↓dopaminergic neurons degeneration; ↓COX-2, TNF $\alpha$                                                                                                                                               | [5]       |
|                                          | Male Balb/C mice treated with MPTP                             | 20 mg/kg (iv) / 7 days                                                                                                | ↑motor coordination; ↓muscle rigidity; ↓DHBA; ↓neuronal damage                                                                                                                                                               | [6]       |
|                                          | C57BL/6 injected MPTP ip                                       | Pretreatment 50 mg/kg bw/day (ig) / 8d; 100 mg/kg bw/day (ig) / 15 days                                               | ↑Striatal DA; ↑TH; ↓nigral neuron death                                                                                                                                                                                      | [7]       |
| Ischemia/reperfusion hypoxia/reperfusion | Male Wistar rats                                               | 30 mg/kg/day (ip) / 7d before ischemia                                                                                | ↓Fluoro-Jade B-positive neurons; ↓ROS, NO, MDA; ↓SOD, GPx; ↑CAT; ↑Na $^{+}$ ,K $^{+}$ -ATPase activity                                                                                                                       | [8]       |
|                                          | Male Sprague–Dawley rats                                       | Pretreatment 2 $\times$ 10 $^{-3}$ , 2 $\times$ 10 $^{-4}$ , 1 $\times$ 10 $^{-4}$ , 2 $\times$ 10 $^{-5}$ mg/kg (iv) | ↓Infarct area; ↓efferent renal activity; ↑GRP78, GRP94                                                                                                                                                                       | [9]       |
|                                          | Male Sprague-Dawley rats                                       | 15, 30 mg/kg (ip) / 7 days before surgery                                                                             | ↑Neurological score; ↓Infarct volume; ↓MDA; ↑SOD ; ↓Apoptosis (Casp3 , TUNEL); ↑Nrf-2; ↑HO-1                                                                                                                                 | [10]      |
|                                          | Male Sprague-Dawley rats                                       | 30 mg/kg (ip) / 7 days                                                                                                | ↓ neurological deficit score; ↓lactate release; ↑glucose levels; ↑ATP and EC levels; ↑adesonine and inosine; ↓hipoxanthine and xanthine; ↓MDA, XO activity                                                                   | [11]      |
|                                          | Male and female C57BL/6 mice                                   | 1, 2.5, 5 mg/kg (iv) / administered 3 or 6h after arterial occlusion                                                  | ↓Infarct volume; ↓IL-1 $\beta$ , TNF $\alpha$ ; ↓microglial activation (Iba1); ↓ROS                                                                                                                                          | [12]      |

|                            |                                                  |                                                                                                                                           |                                                                                                                                                                                 |      |
|----------------------------|--------------------------------------------------|-------------------------------------------------------------------------------------------------------------------------------------------|---------------------------------------------------------------------------------------------------------------------------------------------------------------------------------|------|
|                            | Male Sprague–Dawley rats                         | 30 mg/kg (ip) / 7 days before ischemia                                                                                                    | ↓Infarct volume; ↓ neurological deficit score; ↓ release Asp, Glu; ↓ GABA, Gly, Tau; ↓ PEA, D-ser                                                                               | [13] |
|                            | Sprague–Dawley rats                              | 10-100 mg/kg (ip) / 48 h before the induction of 8 min of asphyxial cardiac arrest                                                        | ↑normal neuron number; ↑SIRT1 activity; ↓UCP2; ↑ADP/O ratio                                                                                                                     | [14] |
|                            | Male Wistar rats                                 | 10 <sup>-7</sup> g/kg (iv) twice / 15 min pre-occlusion and at the time of reperfusion (2h post-occlusion)                                | ↓LPO, H <sub>2</sub> O <sub>2</sub> , G6-PD, LDH; ↑PC, GSH; ↑ATP, MT, HSP70; ↓Apoptosis (cytochrome c release); ↓DNA damage; ↓Brain edema, infarct volume; ↓Behavioral deficits | [15] |
|                            | Male Balb/c mice                                 | 50 mg/kg/day (po) / 7 days                                                                                                                | ↓Infarct volume; ↓ neurological deficit score; ↑microvessels; ↑MMP-2, VEGF                                                                                                      | [16] |
|                            | Male Long-Evans rats                             | 0.01, 0.1, 1 μg/kg (iv) / after 1h MCA occlusion                                                                                          | ↓LDH plasma; ↑NO plasma; ↓iNOS; ↑eNOS; ↓infarct volume; ↓MDA                                                                                                                    | [17] |
|                            | Male Wistar rats                                 | 20 mg/kg (iv) / after ischemia                                                                                                            | ↑hippocampal blood flow; ↑NO; ↓DHBA; ↓SOD activity                                                                                                                              | [18] |
|                            | Male Balb/C                                      | 50 mg/kg (po) / 7 days                                                                                                                    | ↓infarct area; ↓MMP-9 expression & activity                                                                                                                                     | [19] |
|                            | Male New Zealand rabbits                         | 1, 10 mg/kg / 30 min before SCI                                                                                                           | ↑Tarlov score; ↓neuronal damage; ↓MDA; ↑NO                                                                                                                                      | [20] |
|                            | Long-Evans rats                                  | Pretreatment /treatment groups 10 <sup>-6</sup> , 10 <sup>-7</sup> , 10 <sup>-8</sup> , 10 <sup>-9</sup> g/kg (iv) / 15 min before trauma | ↓infarct volume                                                                                                                                                                 | [21] |
|                            | Male and Female Wistar rats                      | 90 mg/kg (ip) / after hypoxia                                                                                                             | ↑Righting reflex performance; ↑Motor coordination; ↑ Reference memory; ↓Brain injury; ↓Demyelination                                                                            | [22] |
|                            | Male and female C57BL/6-J neonatal               | 2 μg/kg, 200 μg/kg, 20 mg/kg (ip)                                                                                                         | ↓Casp 3; ↓Calpain; ↓Tissue loss                                                                                                                                                 | [23] |
|                            |                                                  | 100 mg/kg (ip) / after trauma                                                                                                             | ↑Locomotor activity; ↑Memory; ↑neuron survival                                                                                                                                  | [24] |
|                            | Male Wistar rats                                 | pretreated with 20 mg/kg (ip) / 21 days and subjected to focal ischemia by MCA occlusion                                                  | ↓motor impairment; ↓infarct volume; ↓MDA; ↑GSH                                                                                                                                  | [25] |
| Diabetic neuropathy        | STZ-induced diabetes in male Sprague–Dawley rats | 10, 20 mg/kg / 2 weeks (6 weeks after induction)                                                                                          | Improvement conduction velocity; ↓TNFα, IL-6, COX-2 in sciatic nerve; ↓MDA; ↓NF-κB activation                                                                                   | [26] |
|                            | STZ-induced diabetes in Wistar rats              | 10, 20mg/kg bw day (ip) / 30days (1 week after induction)                                                                                 | ↑ATP & ADP hydrolysis; ↓AchE activity                                                                                                                                           | [27] |
|                            | Male Wistar rats STZ-induced diabetes            | 10 mg/kg bw/day (ip) / 6 weeks                                                                                                            | ↓MDA, XO, NO; ↑GSH                                                                                                                                                              | [28] |
| Alcohol spectrum disorders | Long Evans rat pups exposed to ethanol           | 2, 20, 40, 100 mg/kg twice (po) / 24 h (1 h before ethanol exposure)                                                                      | ↓Apoptosis (Casp3, TUNEL); ↑Cerebellar granule cell survival; ↓ROS; ↓Thiol levels, MDA, 8-isoPGF2α; ↑SOD; Nfr2                                                                  | [29] |
|                            | Wistar male pups exposed to ethanol              | 10, 20 mg/kg (po) / 22 days                                                                                                               | ↑Memory; ↑GSH, SOD, CAT; ↓AChE cortex and hippocampus; ↓LPO; ↓TNFα, IL-1β, TGF-β1; ↓Casp3; ↓NF-κB activation                                                                    | [30] |
|                            | middle-aged C57BL/6N female exposed to ethanol   | 44.2 mg/kg bw/day in combination with ethanol / 6 weeks                                                                                   | ↑Spatial memory                                                                                                                                                                 | [31] |



|                                   |                                                                        |                                                                                               |                                                                                                                    |      |
|-----------------------------------|------------------------------------------------------------------------|-----------------------------------------------------------------------------------------------|--------------------------------------------------------------------------------------------------------------------|------|
| Alzheimer's disease               | Male Sprague–Dawley treated with A $\beta$ i.c.v                       | 100 $\mu$ M/5 $\mu$ l/day (icv) / 7 days                                                      | ↓hippocampal A $\beta$ accumulation; ↑Spatial memory; ↓iNOS, MDA; ↓neuronal death; ↑HO-1                           | [32] |
|                                   | Male Wistar rats injected of colchicine i.c.v.                         | 10, 20 mg/kg (po) / 25d beginning 4 days prior to colchicine                                  | ↓MDA, NO <sub>2</sub> ; ↑GSH, AchE activity                                                                        | [33] |
|                                   | Sprague Dawley male rats were treated with kainic acid                 | 30 mg/kg bw/day (ip) / 5 days                                                                 | ↓hippocampal neurons cell death; ↓Glial activation                                                                 | [34] |
|                                   | Male Wistar rats                                                       | 8 mg/kg bw/day in water / 43-45 days                                                          | ↓GAD activity (neuron cell death)                                                                                  | [35] |
| Spinal cord injury                | Sprague Dawley rats                                                    | 200 mg/kg 3 times/ day (ip) / 3 days after injury                                             | ↑BBB score; ↓Neural damage; ↑SOD; ↓MDA; ↓TNF $\alpha$ , IL-1 $\beta$ , IL-10, MPO; ↓Apoptosis; ↓Bax, Casp3; ↑Bcl-2 | [36] |
|                                   | Male Wistar rats                                                       | 100 mg/kg (ip) / after injury                                                                 | ↑Motor Function score; ↓Lesion area; ↑GSH; ↓MDA, XO, NO                                                            | [37] |
|                                   | Male Wistar rats                                                       | 100 mg/kg (ip) / after injury                                                                 | ↓Lesion area; ↑GSH; ↓MDA, XO, NO                                                                                   | [38] |
|                                   | Sprague-Dawley rats of either sex                                      | 50, 100 mg/kg bw (ip) / after injury                                                          | ↓edema; ↓MDA; ↓LDH activity; ↓cell damage; ↑Na <sup>+</sup> , K <sup>+</sup> -ATPase activity                      | [39] |
| Huntington disease                | Male Sprague–Dawley rats injected of nitropropionic acid               | 100 mg/kg (ip) / 4 weeks (5 days/week)                                                        | ↓Motor nerve conduction velocity; ↓axonal degeneration sciatic nerve                                               | [40] |
|                                   | Wistar rats injected of 3-nitropropionic acid                          | 5, 10 mg/kg bw /day (po) / 8 d beginning 4 days prior to 3-nitropropionic acid administration | ↑Motor Function score and memory; ↑GSH, SQR; ↓MDA, NO                                                              | [41] |
| Chronic constriction injury (CCI) | Male Sprague-Dawley rats                                               | 100 mg/kg (ip) post-injury                                                                    | ↑motor performance; ↑visuospatial memory; ↓Contusion volume; ↓Hippocampal cell loss                                | [42] |
| Multiple sclerosis model          | old female SJL/J mice with experimental autoimmune encephalomyelitis   | 500-1000 mg/kg (po) / 4-6 days                                                                | ↓Optical neuronal damage; ↓Neuronal dysfunction; ↓Loss of axons; ↑SIRT1 activation                                 | [43] |
| chronic fatigue murine model      | Female old BALB/c mice repeated injections of Brucella abortus antigen | 40 mg/kg bw/day (po) / 4 weeks                                                                | ↑Daily running; ↑hippocampal/body weight; ↑Neurogenesis; ↑BDNF; ↓Apoptosis (TUNEL); ↓acetylated-p53                | [44] |
| Not related to pathologies        | C57 BL6 mice                                                           | 200 mg/kg/day (po), 100 mg/kg/day (sc) / 4 weeks                                              | ↑MnSOD expression & activity; ↑CAT, GPx activity                                                                   | [45] |
|                                   | Male Wistar rats                                                       | 1.25-25 mg/kg bw/day (ip) / 7 days                                                            | ↓MDA; ↑Fe-SOD, CAT, POD                                                                                            | [46] |

6-OHDA, 6-hydroxydopamine; 8-iso-PGF<sub>2</sub> $\alpha$ , 8-iso-prostaglandin-F<sub>2</sub> $\alpha$ ; AchE, acetylcholinesterase; ADP, adenosine diphosphate; ADP/O, adenosine diphosphate-oxygen ratio; AMPK, adenosine monophosphate activated protein kinase; ASK-1, Apoptosis signal-regulating kinase 1; ATP, Adenosine triphosphate; A $\beta$ , amyloid beta peptide; Bax, Bcl2-associated X protein; BBB score, Basso, Beattie and Bresnahan score; Bcl-2, B-cell lymphoma 2; BDNF, brain-derived neurotrophic factor; Casp3, caspase 3; CAT, catalase; COX-2, cyclooxygenase 2; CYP2d22, cytochrome P450, family 2, subfamily d, polypeptide 22; DA-D2, Dopamine D2 receptor; DAT, dopamine transporter; DHBA, dihydroxybenzoic acid; DOPAC, 3,4-Dihydroxyphenylacetic acid; D-ser, D serine; EC energy charge; eNOS, endothelial nitric oxide synthetase; FeSOD, iron superoxide dismutase; G6-PD, glucose-6-phosphate dehydrogenase; GABA, neurotransmitter gamma-aminobutyric acid; GAD, glutamate decarboxylase; Gly, glycine; GPx, glutathione peroxidase; GRP78, endoplasmic reticulum chaperone protein GRP78; GRP94, endoplasmic reticulum chaperone protein GRP94; GSH, glutathione; HO-1, heme oxygenase; HSP70, 70-kDa heat-shock protein; Iba1 ionized calcium binding adaptor molecule 1; icv, intracerebroventricularly; ig, intragastrically; IL, interleukin; iNOS, inducible nitric oxide synthase; ip, intraperitoneally; LDH, lactate dehydrogenase; LPO, lipoperoxidase; MDA, malondialdehyde; MMP, matrix metalloproteinase; MnSOD, manganese superoxide dismutase; MPO, myeloperoxidase; MT, metallothionein; N<sub>2</sub>O, nitrous oxide; NFkB, nuclear factor kappa B; Nfr2, nuclear factor (erythroid-derived 2)-like 2; NO, nitric oxide; P38MAPK, p38 mitogen-activated protein kinases; p53, tumour protein 53; PC, protein carbonyl; PEA, phosphoprotein enriched in astrocytes; PGC- $\alpha$ , peroxisome proliferator-activated receptor gamma coactivator 1; PLA2, phospholipase A2; po, per oral; POD, peroxidase; ROS, reactive oxygen species; sc, subcutaneously; SIRT1, sirtuin 1; SNc, substantia nigra cells; SOD, superoxide dismutase; SQR, sulfide quinone reductase; STZ, streptozotocin; T-AOC, total antioxidant capacity; Tau, taurine; TBARS, thiobarbituric acid reactive substances; TGF- $\beta$ 1, transforming growth factor  $\beta$ 1; TH, tyrosine hydroxylase; TNF $\alpha$ , tumour necrosis factor alpha; Trx2, thioredoxin 2; TUNEL, terminal deoxynucleotidyl transferase dUTP nick end labeling; UCP2, mitochondrial uncoupling protein 2; VMAT2, vesicular monoamine transporter 2; XO, xanthine oxidase. Effect is indicated by ↓: reduction; ↑: induction; p-: phosphorylate status.

## REFERENCES FOR SUPPLEMENTARY TABLE 9.

- [1] Srivastava G, Dixit A, Yadav S, Patel DK, *et al.* Resveratrol potentiates cytochrome P450 2 d22-mediated neuroprotection in maneb- and paraquat-induced parkinsonism in the mouse. *Free Radic Biol Med* 2012; 52: 1294-306.

- [2] Mudò G, Mäkelä J, Di Liberto V, Tselykh TV, *et al.* Transgenic expression and activation of PGC-1 $\alpha$  protect dopaminergic neurons in the MPTP mouse model of Parkinson's disease. *Cell Mol Life Sci* 2012; 7: 1153-65.
- [3] Wang Y, Xu H, Fu Q, Ma R, *et al.* Protective effect of resveratrol derived from *Polygonum cuspidatum* and its liposomal form on nigral cells in parkinsonian rats. *J Neurol Sci* 2011; 304: 29-34.
- [4] Khan MM, Ahmad A, Ishrat T, Khan MB, Hoda *et al.* Resveratrol attenuates 6-hydroxydopamine-induced oxidative damage and dopamine depletion in rat model of Parkinson's disease. *Brain Res* 2010; 1328: 139-51.
- [5] Jin F, Wu Q, Lu YF, Gong QH, Shi JS. Neuroprotective effect of resveratrol on 6-OHDA-induced Parkinson's disease in rats. *Eur J Pharmacol* 2008; 600: 78-82.
- [6] Lu KT, Ko MC, Chen BY, Huang JC, *et al.* Neuroprotective effects of resveratrol on MPTP-induced neuron loss mediated by free radical scavenging. *J Agric Food Chem* 2008; 56: 6910-691.
- [7] Blanchet J, Longpré F, Bureau G, Morissette M, *et al.* Resveratrol, a red wine polyphenol, protects dopaminergic neurons in MPTP-treated mice. *Prog Neuropsychopharmacol Biol Psychiatry* 2008; 32: 1243-50.
- [8] Simão F, Matté A, Matté C, Soares FM, *et al.* Resveratrol prevents oxidative stress and inhibition of Na(+)/K(+)-ATPase activity induced by transient global cerebral ischemia in rats. *J Nutr Biochem* 2011; 22: 921-8.
- [9] Saleh MC, Connell BJ, Saleh TM. Resveratrol preconditioning induces cellular stress proteins and is mediated via NMDA and estrogen receptors. *Neuroscience* 2010; 166: 445-54.
- [10] Ren J, Fan C, Chen N, Huang J, *et al.* Resveratrol pretreatment attenuates cerebral ischemic injury by upregulating expression of transcription factor Nrf2 and HO-1 in rats. *Neurochem Res* 2011; 36: 2352-62.
- [11] Li H, Yan Z, Zhu J, Yang J, He J. Neuroprotective effects of resveratrol on ischemic injury mediated by improving brain energy metabolism and alleviating oxidative stress in rats. *Neuropharmacology* 2011; 60: 252-8.
- [12] Shin JA, Lee H, Lim YK, Koh Y, *et al.* Therapeutic effects of resveratrol during acute periods following experimental ischemic stroke. *J Neuroimmunol* 2010; 227: 93-100.
- [13] Li C, Yan Z, Yang J, Chen H, *et al.* Neuroprotective effects of resveratrol on ischemic injury mediated by modulating the release of neurotransmitter and neuromodulator in rats. *Neurochem Int* 2010; 56: 495-500.
- [14] Della-Morte D, Dave KR, DeFazio RA, Bao YC, *et al.* Resveratrol pretreatment protects rat brain from cerebral ischemic damage via a sirtuin 1-uncoupling protein 2 pathway. *Neuroscience* 2009; 159: 993-1002.
- [15] Yousuf S, Atif F, Ahmad M, Hoda N, *et al.* Resveratrol exerts its neuroprotective effect by modulating mitochondrial dysfunctions and associated cell death during cerebral ischemia. *Brain Res* 2009; 1250: 242-5.
- [16] Dong W, Li N, Gao D, Zhen H, *et al.* Resveratrol attenuates ischemic brain damage in the delayed phase after stroke and induces messenger RNA and protein express for angiogenic factors. *J Vasc Surg* 2008; 48: 709-14.
- [17] Tsai SK, Hung LM, Fu YT, Cheng H, *et al.* Resveratrol neuroprotective effects during focal cerebral ischemia injury via nitric oxide mechanism in rats. *J Vasc Surg* 2007; 46: 346-53.
- [18] Lu KT, Chiou RY, Chen LG, Chen MH, *et al.* Neuroprotective effects of resveratrol on cerebral ischemia-induced neuron loss mediated by free radical scavenging and cerebral blood flow elevation. *J Agric Food Chem* 2006; 54: 3126-31.
- [19] Gao D, Zhang X, Jiang X, Peng Y, *et al.* Resveratrol reduces the elevated level of MMP-9 induced by cerebral ischemia-reperfusion in mice. *Life Sci* 2006; 78: 2564-70.
- [20] Kiziltepe U, Turan NN, Han U, Ulus AT, *et al.* Resveratrol, a red wine polyphenol, protects spinal cord from ischemia-reperfusion injury. *J Vasc Surg* 2004; 40: 138-45.
- [21] Huang SS, Tsai MC, Chih CL, Hung LM, *et al.* Resveratrol reduction of infarct size in Long-Evans rats subjected to focal cerebral ischemia. *Life Sci* 2001; 69: 1057-65.
- [22] Karalis F, Soubasi V, Georgiou T, Nakas CT, *et al.* Resveratrol ameliorates hypoxia/ischemia-induced behavioral deficits and brain injury in the neonatal rat brain. *Brain Res* 2011; 1425: 98-110.
- [23] West T, Atzeva M, Holtzman DM. Pomegranate polyphenols and resveratrol protect the neonatal brain against hypoxic-ischemic injury. *Dev Neurosci* 2007; 29: 363-72.
- [24] Sönmez U, Sönmez A, Erbil G, Tekmen I, *et al.* Neuroprotective effects of resveratrol against traumatic brain injury in immature rats. *Neurosci Lett* 2007; 420: 133-7.
- [25] Sinha K, Chaudhary G, Gupta YK. Protective effect of resveratrol against oxidative stress in middle cerebral artery occlusion model of stroke in rats. *Life Sci* 2002; 71: 655-65.
- [26] Kumar A, Sharma SS. NF-kappaB inhibitory action of resveratrol: a probable mechanism of neuroprotection in experimental diabetic neuropathy. *Biochem Biophys Res Commun* 2010; 394: 360-5.
- [27] Schmatz R, Mazzanti CM, Spanevello R, Stefanello N, *et al.* Ectonucleotidase and acetylcholinesterase activities in synaptosomes from the cerebral cortex of streptozotocin-induced diabetic rats and treated with resveratrol. *Brain Res Bull* 2009; 80: 371-6.
- [28] Ates O, Cayli S, Altinoz E, Gurses I, *et al.* Neuroprotection by resveratrol against traumatic brain injury in rats. *Mol Cell Biochem* 2007; 294: 137-44.
- [29] Kumar A, Singh CK, Lavoie HA, Dipette DJ, *et al.* Resveratrol restores Nrf2 level and prevents ethanol-induced toxic effects in the cerebellum of a rodent model of fetal alcohol spectrum disorders. *Mol Pharmacol* 2011; 80: 446-57.
- [30] Tiwari V, Chopra K. Resveratrol prevents alcohol-induced cognitive deficits and brain damage by blocking inflammatory signaling and cell death cascade in neonatal rat brain. *J Neurochem* 2011; 117: 678-90.
- [31] Ranney A, Petro MS. Resveratrol protects spatial learning in middle-aged C57BL/6 mice from effects of ethanol. *Behav Pharmacol* 2009; 20: 330-6.
- [32] Huang TC, Lu KT, Wo YY, Wu YJ, *et al.* Resveratrol protects rats from A $\beta$ -induced neurotoxicity by the reduction of iNOS expression and lipid peroxidation. *PLoS One* 2011; 6: e29102.
- [33] Kumar A, Naidu PS, Seghal N, Padi SS. Neuroprotective effects of resveratrol against intracerebroventricular colchicine-induced cognitive impairment and oxidative stress in rats. *Pharmacology* 2007; 79:17-26.
- [34] Wang Q, Yu S, Simonyi A, Rottinghaus G, *et al.* Resveratrol protects against neurotoxicity induced by kainic acid. *Neurochem Res* 2004; 29: 2105-012.
- [35] Virgili M, Contestabile A. Partial neuroprotection of *in vivo* excitotoxic brain damage by chronic administration of the red wine antioxidant agent, trans-resveratrol in rats. *Neurosci Lett* 2000; 281: 123-6.
- [36] Liu C, Shi Z, Fan L, Zhang C, *et al.* Resveratrol improves neuron protection and functional recovery in rat model of spinal cord injury. *Brain Res* 2011; 1374: 100-9.
- [37] Ates O, Cayli S, Altinoz E, Gurses I, *et al.* Effects of resveratrol and methylprednisolone on biochemical, neurobehavioral and histopathological recovery after experimental spinal cord injury. *Acta Pharmacol Sin* 2006; 27: 1317-25.
- [38] Ates O, Cayli SR, Yucel N, Altinoz E, *et al.* Central nervous system protection by resveratrol in streptozotocin-induced diabetic rats. *J Clin Neurosci* 2007; 14: 256-60.
- [39] Yang YB, Piao YJ. Effects of resveratrol on secondary damages after acute spinal cord injury in rats. *Acta Pharmacol Sin* 2003; 24: 703-10.
- [40] Binienda ZK, Beaudoin MA, Gough B, Ali SF, *et al.* Assessment of 3-nitropropionic acid-evoked peripheral neuropathy in rats: neuroprotective effects of acetyl-L-carnitine and resveratrol. *Neurosci Lett* 2010; 480: 117-21.

- [41] Kumar P, Padi SS, Naidu PS, Kumar A. Effect of resveratrol on 3-nitropropionic acid-induced biochemical and behavioural changes: possible neuro-protective mechanisms. *Behav Pharmacol* 2006; 17: 485-92.
- [42] Singleton RH, Yan HQ, Fellows-Mayle W, Dixon CE. Resveratrol attenuates behavioral impairments and reduces cortical and hippocampal loss in a rat controlled cortical impact model of traumatic brain injury. *J Neurotrauma* 2010; 27: 1091-9.
- [43] Shindler KS, Ventura E, Dutt M, Elliott P, *et al.* Oral resveratrol reduces neuronal damage in a model of multiple sclerosis. *J Neuroophthalmol* 2010; 30: 328-39.
- [44] Rahvar M, Nikseresht M, Shafiee SM, Naghibalhossaini F, *et al.* Effect of oral resveratrol on the BDNF gene expression in the hippocampus of the rat brain. *Neurochem Res* 2011; 36: 761-5.
- [45] Robb EL, Winkelmolen L, Visanji N, Brotchie J, *et al.* Dietary resveratrol administration increases MnSOD expression and activity in mouse brain. *Biochem Biophys Res Commun* 2008; 372: 254-9.
- [46] Mokni M, Elkahoui S, Limam F, Amri M, *et al.* Effect of resveratrol on antioxidant enzyme activities in the brain of healthy rat. *Neurochem Res* 2007; 32: 981-87.

**Supplementary Table 10. Anti-aging effects of resveratrol in animal models.**

| Animal Model                                                          | Treatment                                                                                          | Effects and Mechanisms                                                                                                                                                                                                                                                  | Reference |
|-----------------------------------------------------------------------|----------------------------------------------------------------------------------------------------|-------------------------------------------------------------------------------------------------------------------------------------------------------------------------------------------------------------------------------------------------------------------------|-----------|
| <i>S. cerevisiae</i>                                                  | 2-5 $\mu$ M / 19h                                                                                  | $\uparrow$ yeast replicative lifespan (70%)                                                                                                                                                                                                                             | [1]       |
| <i>C. elegans</i><br><i>D. melanogaster</i>                           | 100 $\mu$ M / thorough life                                                                        | $\uparrow$ lifespan (14%)<br>$\uparrow$ lifespan (29%)                                                                                                                                                                                                                  | [2]       |
| <i>Nothobranchius furzeri</i>                                         | 24 $\mu$ g/g food; 120 $\mu$ g/g food / from adulthood until death                                 | $\uparrow$ median (33%) and maximum (27%) lifespan; $\downarrow$ cognitive decline;<br>$\uparrow$ locomotor activity;<br>$\downarrow$ neurofibrillary degeneration                                                                                                      | [3]       |
| C57BL/6NIA mice                                                       | 0.04% in high-fat diet / from middle age until death                                               | $\downarrow$ risk of death (31%); $\uparrow$ motor skills; $\uparrow$ insulin sensitivity; $\uparrow$ AMPK in liver;<br>$\downarrow$ Organ pathology                                                                                                                    | [4]       |
| C57BL/6J mice                                                         | 200 or 400 mg/kg/day with high-fat diet / 15 weeks                                                 | $\downarrow$ fat body mass; $\uparrow$ O <sub>2</sub> consumption; $\uparrow$ mitochondria structure (size and DNA content); $\uparrow$ aerobic capacity in muscle; $\uparrow$ motor function; $\uparrow$ PGC- $\alpha$ activity                                        | [5]       |
| <i>Nothobranchius guentheri</i>                                       | 200 $\mu$ g/g food / throughout lifespan                                                           | $\uparrow$ 20% mean lifespan (23% $\sigma$ , 13% $\rho$ ); $\downarrow$ Fluoro-Jade B-positive neurons ;<br>$\uparrow$ Cognitive ability (learning & memory); $\uparrow$ locomotor activity; $\downarrow$ Senescence (SA- $\beta$ -Gal activity); $\downarrow$ SOD, GPx | [6]       |
| Wistar male rats middle-aged (12 months old) and aged (21 months old) |                                                                                                    | $\downarrow$ hypersensitivity response; $\uparrow$ KLH, IG, IG1, IG2 $\alpha$                                                                                                                                                                                           | [7]       |
| Honey bees four-day-old                                               | 30, or 130 $\mu$ M / from adulthood until death                                                    | $\downarrow$ Gustatory responsiveness; $\uparrow$ Lifespan 35%; $\downarrow$ Food consumption                                                                                                                                                                           | [8]       |
| Male Wistar rats                                                      | low-RES diet (0.0015 mg/kg of chow) and high-RES diet (4 mg/kg of chow) / from 12 days until death | $\downarrow$ p53 expression in vascular tissue; $\uparrow$ telomere length in aorta cells;<br>$\uparrow$ telomerase activity in aorta cells                                                                                                                             | [9]       |
| Mice                                                                  | 50 mg/kg / from 14 months until 30 months of age                                                   | $\uparrow$ $\beta$ -catenin expression in aged heart; $\uparrow$ Wnt pathway                                                                                                                                                                                            | [10]      |
| SIRT1 knockout mice                                                   | 25-30 mg/kg (po); 215-235 mg/kg (po) / from 14 months to 30 months of age                          | $\uparrow$ mitochondrial biogenesis; $\downarrow$ glucose levels; AMPK/SIRT1                                                                                                                                                                                            | [11]      |
| Mice treated with ben-zopyrene (lung cancer)                          | 5.7 $\mu$ g/mL in water                                                                            | $\downarrow$ premature mitochondrial senescence                                                                                                                                                                                                                         | [12]      |
| <i>Microcebus murinus</i>                                             | 200 mg/kg (po) / 33 months                                                                         | $\downarrow$ plasma glucose; $\downarrow$ insuline; $\downarrow$ HOMA-IR index                                                                                                                                                                                          | [13]      |
| UM-HET3 mice (heterogeneous mice)                                     | 50 mg/kg / from 4 months throughout lifespan                                                       | $\downarrow$ body weight in $\rho$<br>No effect on survival or locomotor activity                                                                                                                                                                                       | [14]      |
| <i>Microcebus murinus</i>                                             | 200 mg/kg (po)                                                                                     | $\uparrow$ active wake-time; $\downarrow$ paradoxical sleep; $\uparrow$ mitochondrial biogenesis; $\downarrow$ slow-wave sleep                                                                                                                                          | [15]      |
| C57BL/6J mice                                                         | 20 mg/kg (ip), 400 mg/kg (po) / 14 weeks                                                           | $\uparrow$ cAMP skeletal muscle and adipose tissue; $\uparrow$ mitochondrial content muscle                                                                                                                                                                             | [16]      |

|                                                                                  |                                                                  |                                                                                                                                                                                                                                                                                                   |      |
|----------------------------------------------------------------------------------|------------------------------------------------------------------|---------------------------------------------------------------------------------------------------------------------------------------------------------------------------------------------------------------------------------------------------------------------------------------------------|------|
| Wistar male rats<br>High fat/sucrose diet                                        | 50, 100 mg/kg / 14 weeks                                         | ↓weight; ↓aorta senescence (SA-β-gal); ↓ROS aorta; ↓NADPH oxidase p47phox; ↑SIRT1                                                                                                                                                                                                                 | [17] |
| <i>Drosophila melanogaster</i>                                                   | 100, 200, 400 μM (po) / throughout lifespan                      | ↑mean lifespan ♀ fed high fat diet; ↑mean lifespan ♀ fed high protein diet; ↑mean lifespan sod1RNAi females; ↓dIlp3 & dIlp5; ↓GstD1, HSP68; ↓Prx2540-1 & Prx6005                                                                                                                                  | [18] |
| <i>Drosophila melanogaster</i>                                                   | 25-800 μM (po)                                                   | ↑body weight; ↓body lipid content ♀; ↑preadult viability; ↑longevity ♀; ↑locomotor activity ♂; ↑SOD, CAT ♀ & ♂                                                                                                                                                                                    | [19] |
| C57/BL6 mice middle-aged (18 months)                                             | 0.05% diet / 10 months                                           | ↑MnSOD activity in muscle; ↓H <sub>2</sub> O <sub>2</sub> , MDA; ↑fast-twitch fiber contractile function                                                                                                                                                                                          | [20] |
| C57BWrnΔhel/Δhel                                                                 | 0.04% diet / 9 months                                            | ↓liver steatosis; ↓liver sinusoidal endothelial defenestration; ↓HOMA-IR index; ↓DNA damage cardiac tissue; ↓MDA (heart & liver); ↑protein carbonylation; ↓AMPK-α; ↓FASN expression; ↑Glutation metabolism pathway; ↑glycolysis/gluconeogenesis; ↑piruvate metabolism; ↑insulin signaling pathway | [21] |
| <i>Caenorhabditis elegans</i>                                                    | 0.5-5 μM                                                         | ↑mean lifespan; ↑maximum lifespan                                                                                                                                                                                                                                                                 | [22] |
| F2 hybrid four-way cross mice (CB6F1 x C3D2F1 (C3H x DBA/2) of three age groups  | 1.50–2.27 mg/kg bw (po) / 6-12 months                            | Spleen cells; ↑CD4+, CD8+, CD4+-CD25+ old mice; ↑CD4+, -CD69+ middle age mice; Intracellular CD4+ spleen cells: ↑IL-2, IL-4, IL-10, IFN-γ young mice; ↓IL-4, IL-5, IL-10 middle age & old<br>Extracellular: ↑IL-2, IL-4, IL-10 middle age & old; ↓IFN-γ, TNFα, IL-6 middle age & old; ↓8OHdG      | [23] |
| B6C3F1 mice.                                                                     | 50 mg /kg of diet / from 15 to 30 months of age                  | ↓C4, csprs, Pah, Cxcl14, Scap2 in heart; ↓c1qa in cerebellum                                                                                                                                                                                                                                      | [24] |
| F2 hybrid four-way cross mice (CB6F1 × C3D2F1 (C3H × DBA/2)) of three age groups | 14.09 ± 3.35 mg/L in water / 6-12 months                         | ↓8OHdG liver, kidney young & middle age; ↓8OHdG heart middle age & old; ↓8-iso-PGF2α old mice; ↓PCC liver in old mice; ↓PCC kidney middle age and old mice                                                                                                                                        | [25] |
| Male C57BL/6 mice 1 year old                                                     | 15 mg/kg (po) / 12 months                                        | ↑vascular density in brain; ↑cognitive function; ↓microvascular abnormalities                                                                                                                                                                                                                     | [26] |
| Senescence-accelerated mice (SAM)                                                | 0.2% (w/w) diet (po) / 13 weeks                                  | ↑endurance capacity; ↓body weight; ↑adiponectine, Hb; ↓insulin, TG, glucose, Serum and EDL TBARS; ↑oxygen consumption; ↑PGC-1β RNA; ↑CYOX III, IV, MCAD                                                                                                                                           | [27] |
| Male B6C3F(1) mice                                                               | 1.25 mg/kg (po) / from 2 to 5 months of age                      | ↑Pdk4, Ucp3                                                                                                                                                                                                                                                                                       | [28] |
| Male C57BL/6NIA                                                                  | 0.04% resveratrol (po) / beginning at one year of age            | ↑motor coordination; ↓vascular dysfunction; ↑aortic elasticity; ↓cataract formation<br>↑bone mineral density; ↓functional decline; ↓endothelial apoptosis; ↓TNFα, IL-1β, IL-6, ICAM-1, iNOS                                                                                                       | [29] |
| Male C57BL/6×C3H/He F1 hybrid mice                                               | 50 mg /kg diet/ starting at 2 & 14 months of age until 30 months | ↓cardiac dysfunction; ↓glucose levels; ↓insuline resistance; ↑PGC1-α; ↑F2-isoprostanes in heart & brain                                                                                                                                                                                           | [30] |

8-iso-PGF2α, 8-iso-prostaglandin-F2α; 8OHdG, 8-Oxo-2'-deoxyguanosine; AMPK, adenosine monophosphate activated protein kinase; C1qa, complement component 1q; C4, complement component 4; cAMP, cyclic adenosine monophosphate; CAT, catalase; CD4, cluster of differentiation 4; CD8, cluster of differentiation 8; CD25, cluster of differentiation 25; CD69, cluster of differentiation 69; Csprs component of Sp100-rs; Cxcl14, chemokine (C-X-C motif) ligand 14; CYOX, cytochrome c oxidase; dIlp, insulin related peptide; EDL, extensor digitorum longus; FASN, fatty acid synthase; GPx, glutathione peroxidase; GstD1, glutathione S transferase D1; HSP68, heat shock protein 68; HOMA-IR, homeostatic model assessment-insulin resistance; ICAM-1, intercellular adhesion molecule 1; IFN-γ, interferon-gamma; IG, immunoglobulin; IL-2, interleukin 2; IL-4, interleukin 4; IL-5, interleukin 5; IL-6, interleukin 6; IL-10, interleukin 10; IL-1β, interleukin 1-beta; IL-6, interleukin 6; iNOS, inducible nitric oxide synthase; KLH, keyhole limpet hemocyanin; MCAD, medium-chain acyl-CoA dehydrogenase; MDA, malondialdehyde; MnSOD, manganese superoxide dismutase; NADPH, nicotinamide adenine dinucleotide phosphate; p53, tumour protein 53; Pah, phenylalanine hydroxylase; Pdk4, pyruvate dehydrogenase kinase isoform 4; PCC, acetyl-CoA carboxylase; PGC-β, peroxisome proliferator-activated receptor gamma coactivator 1 beta; Prx2540-1, peroxiredoxin 2540-1; Prx6005, Peroxiredoxin 6005; ROS, reactive oxygen species; SA-β-Gal, senescence-associated beta-galactosidase; SIRT1, sirtuin 1; SKAP2, src kinase associated phosphoprotein 2; SOD, superoxide dismutase; TBARS, thiobarbituric acid reactive substances; TG, tryglyceride; TNFα, tumour necrosis factor alpha; Ucp3, mitochondrial uncoupling protein 3. Effect is indicated by ↓: reduction; ↑: induction; p-: phosphorylate status

#### REFERENCES FOR SUPPLEMENTARY TABLE 10.

- [1] Howitz KT, Bitterman KJ, Cohen HY, Lamming DW, *et al.* Small molecule activators of sirtuins extend *Saccharomyces cerevisiae* lifespan. *Nature*. 2003; 425:191-196.

- [2] Wood JG, Rogina B, Lavu S, Howitz K, *et al.* Sirtuin activators mimic caloric restriction and delay ageing in metazoans. *Nature*. 2004; 430:686-689.
- [3] Valenzano DR, Terzibasi E, Genade T, Cattaneo A, *et al.* Resveratrol prolongs lifespan and retards the onset of age-related markers in a short-lived vertebrate. *Curr Biol*. 2006; 16:296-300.
- [4] Baur JA, Pearson KJ, Price NL, Jamieson HA, Lerin C, *et al.* Resveratrol improves health and survival of mice on a high-calorie diet. *Nature*. 2006; 444:337-342.
- [5] Lagouge M, Argmann C, Gerhart-Hines Z, Meziane H, *et al.* Resveratrol improves mitochondrial function and protects against metabolic disease by activating SIRT1 and PGC-1alpha. *Cell*. 2006; 127:1109-1122.
- [6] Yu X, Li G. Effects of resveratrol on longevity, cognitive ability and aging-related histological markers in the annual fish *Nothobranchius guentheri*. *Exp Gerontol* 2012; doi.org/10.1016/j.exger.2012.08.009.
- [7] Yuan J, Lu L, Zhang Z, Zhang S. Dietary intake of resveratrol enhances the adaptive immunity of aged rats. *Rejuvenation Res* 2012; 5.
- [8] Rascón B, Hubbard BP, Sinclair DA, Amdam GV. The lifespan extension effects of resveratrol are conserved in the honey bee and may be driven by a mechanism related to caloric restriction. *Aging (Albany NY)* 2012; 4: 499-508.
- [9] da Luz PL, Tanaka L, Brum PC, Dourado PM, *et al.* Red wine and equivalent oral pharmacological doses of resveratrol delay vascular aging but do not extend life span in rats. *Atherosclerosis* 2012; 224: 136-42.
- [10] Li Q, Hannah SS. Wnt/ $\beta$ -catenin signaling is downregulated but restored by nutrition interventions in the aged heart in mice. *Arch Gerontol Geriatr* 2012; 55: 749-54.
- [11] Price NL, Gomes AP, Ling AJ, Duarte FV, *et al.* SIRT1 is required for AMPK activation and the beneficial effects of resveratrol on mitochondrial function. *Cell Metab* 2012; 15: 675-90.
- [12] Malhotra A, Nair P, Dhawan DK. Premature mitochondrial senescence and related ultrastructural changes during lung carcinogenesis modulation by curcumin and resveratrol. *Ultrastruct Pathol* 2012; 36: 179-84.
- [13] Marchal J, Blanc S, Epelbaum J, Aujard F, *et al.* Effects of chronic calorie restriction or dietary resveratrol supplementation on insulin sensitivity markers in a primate, *Microcebus murinus*. *PLoS One* 2012; 7: e34289.
- [14] Strong R, Miller RA, Astle CM, Baur JA, *et al.* Evaluation of Resveratrol, Green Tea Extract, Curcumin, Oxaloacetic Acid, and Medium-Chain Triglyceride Oil on Life Span of Genetically Heterogeneous Mice. *J Gerontol A Biol Sci Med Sci* 2012; doi: 10.1093/gerona/gls070.
- [15] Pifferi F, Rahman A, Languille S, Auffret A, *et al.* Effects of dietary resveratrol on the sleep-wake cycle in the non-human primate gray mouse lemur (*Microcebus murinus*). *Chronobiol Int* 2012; 29: 261-70.
- [16] Park SJ, Ahmad F, Philp A, Baar K, *et al.* Resveratrol ameliorates aging-related metabolic phenotypes by inhibiting cAMP phosphodiesterases. *Cell* 2012; 148: 421-33.
- [17] Tang Y, Xu J, Qu W, Peng X, *et al.* Resveratrol reduces vascular cell senescence through attenuation of oxidative stress by SIRT1/NADPH oxidase-dependent mechanisms. *J Nutr Biochem* 2012; doi:10.1016/j.jnutbio.2011.08.008.
- [18] Wang C, Wheeler CT, Alberico T, Sun X, Seeberger *et al.* The effect of resveratrol on lifespan depends on both gender and dietary nutrient composition in *Drosophila melanogaster*. *Age (Dordr)* 2011; doi: 10.1007/s11357-011-9332-3.
- [19] Chandrashekar KT, Shakarad MN. Aloe vera or resveratrol supplementation in larval diet delays adult aging in the fruit fly, *Drosophila melanogaster*. *J Gerontol A Biol Sci Med Sci* 2011; 66: 965-71.
- [20] Jackson JR, Ryan MJ, Alway SE. Long-term supplementation with resveratrol alleviates oxidative stress but does not attenuate sarcopenia in aged mice. *J Gerontol A Biol Sci Med Sci* 2011; 66: 751-64.
- [21] Labbé A, Garand C, Cogger VC, Paquet ER, *et al.* Resveratrol improves insulin resistance hyperglycemia and hepatosteatosis but not hypertriglyceridemia, inflammation, and life span in a mouse model for Werner syndrome. *J Gerontol A Biol Sci Med Sci* 2011; 66: 264-78.
- [22] Zarse K, Schmeisser S, Birringer M, Falk E, *et al.* Differential effects of resveratrol and SRT1720 on lifespan of adult *Caenorhabditis elegans*. *Horm Metab Res* 2010; 42: 837-9.
- [23] Wong YT, Gruber J, Jenner AM, Tay FE, *et al.* Chronic resveratrol intake reverses pro-inflammatory cytokine profile and oxidative DNA damage in ageing hybrid mice. *Age (Dordr)* 2011; 33: 229-46.
- [24] Park SK, Kim K, Page GP, Allison DB, *et al.* Gene expression profiling of aging in multiple mouse strains: identification of aging biomarkers and impact of dietary antioxidants. *Aging Cell* 2009; 8: 484-95.
- [25] Wong YT, Gruber J, Jenner AM, Ng MP, *et al.* Elevation of oxidative-damage biomarkers during aging in F2 hybrid mice: protection by chronic oral intake of resveratrol. *Free Radic Biol Med* 2009; 46: 799-809.
- [26] Oomen CA, Farkas E, Roman V, van der Beek EM, *et al.* Resveratrol preserves cerebrovascular density and cognitive function in aging mice. *Front Aging Neurosci* 2009; 9: 1-4.
- [27] Murase T, Haramizu S, Ota N, Hase T. Suppression of the aging-associated decline in physical performance by a combination of resveratrol intake and habitual exercise in senescence-accelerated mice. *Biogerontology* 2009; 10: 423-34.
- [28] Barger JL, Kayo T, Pugh TD, Prolla TA, *et al.* Short-term consumption of a resveratrol-containing nutraceutical mixture mimics gene expression of long-term caloric restriction in mouse heart. *Exp Gerontol* 2008; 43: 859-66.
- [29] Pearson KJ, Baur JA, Lewis KN, Peshkin L, *et al.* Resveratrol delays age-related deterioration and mimics transcriptional aspects of dietary restriction without extending life span. *Cell Metab* 2008; 8: 157-68.
- [30] Barger JL, Kayo T, Vann JM, Arias EB, *et al.* A low dose of dietary resveratrol partially mimics caloric restriction and retards aging parameters in mice. *PLoS One* 2008; 3: e2264.

**Supplementary Table 11. Human trials dealing with resveratrol and registered at clinicaltrials.gov.**

| Status*                | Trial Title and Features                                                                                                                                                                                                                                                                                                                                                                                                                                                                                                                                                                                                                                                                                                                                                                                                                                                                                                                           |
|------------------------|----------------------------------------------------------------------------------------------------------------------------------------------------------------------------------------------------------------------------------------------------------------------------------------------------------------------------------------------------------------------------------------------------------------------------------------------------------------------------------------------------------------------------------------------------------------------------------------------------------------------------------------------------------------------------------------------------------------------------------------------------------------------------------------------------------------------------------------------------------------------------------------------------------------------------------------------------|
| Active, not recruiting | <p data-bbox="297 359 976 386">Resveratrol With or Without Piperine to Enhance Plasma Levels of Resveratrol</p> <p data-bbox="297 407 667 434">Condition: Pharmacokinetics</p> <p data-bbox="297 455 1487 512">Interventions: Dietary Supplement: Resveratrol; Dietary Supplement: Resveratrol 2.5 g with 5 mg piperine; Dietary Supplement: Resveratrol 2.5 g with 25 mg piperine</p> <p data-bbox="297 533 553 560">Gender: Both</p> <p data-bbox="297 581 537 609">Number Enrolled: 24</p> <p data-bbox="297 630 1487 686">Study Design: Allocation: Randomized; Endpoint Classification: Pharmacokinetics Study; Intervention Model: Parallel Assignment; Masking: Double Blind (Subject, Caregiver, Investigator, Outcomes Assessor); Primary Purpose: Prevention</p> <p data-bbox="297 707 618 735">Start Date: March 2011</p> <p data-bbox="297 756 987 783">Outcome Measures: Blood levels of study drugs; Side effects of study drugs</p> |
| Active, not recruiting | <p data-bbox="662 835 1166 863">A Study of Resveratrol as Treatment for Friedreich Ataxia</p> <p data-bbox="297 884 667 911">Condition: Friedreich Ataxia</p> <p data-bbox="297 932 667 959">Intervention: Drug: Resveratrol</p> <p data-bbox="297 980 553 1008">Gender: Both</p> <p data-bbox="297 1029 537 1056">Number Enrolled: 30</p> <p data-bbox="297 1077 1425 1134">Study Design: Allocation: Non-Randomized; Endpoint Classification: Safety/Efficacy Study; Intervention Model: Parallel Assignment; Masking: Open Label; Primary Purpose: Treatment</p> <p data-bbox="297 1155 602 1182">Start Date: April 2011</p> <p data-bbox="297 1203 1471 1260">Outcome Measures: Lymphocyte frataxin level; Oxidative stress markers; Clinical rating scales of ataxia; Echocardiogram measures; Pharmacokinetic studies of resveratrol</p>                                                                                                     |
| Active, not recruiting | <p data-bbox="686 1318 1141 1346">Resveratrol for Improved Performance in the Elderly</p> <p data-bbox="297 1367 586 1394">Condition: Memory</p> <p data-bbox="297 1415 1271 1442">Interventions: Dietary Supplement: Placebo; Drug: Low dose Resveratrol; Drug: High dose Resveratrol</p> <p data-bbox="297 1463 553 1491">Gender: Both</p> <p data-bbox="297 1512 537 1539">Number Enrolled: 30</p> <p data-bbox="297 1560 1146 1617">Study Design: Allocation: Randomized; Intervention Model: Parallel Assignment; Masking: Double Blind (Subject, Caregiver, Investigator, Outcomes Assessor)</p> <p data-bbox="297 1638 651 1665">Start Date: November 2009</p> <p data-bbox="297 1686 1019 1713">Outcome Measures: Safety Outcomes; Cognitive Outcomes; Physical Outcomes</p>                                                                                                                                                               |
| Active, not recruiting | <p data-bbox="496 1770 1333 1797">The Effects of Resveratrol Supplementation on Measurements of Health and Human Performance</p> <p data-bbox="297 1818 630 1845">Condition: Inflammation</p> <p data-bbox="297 1866 1125 1894">Interventions: Dietary Supplement: resveratrol; Other: Placebo Comparator: Sugar Pill</p> <p data-bbox="297 1915 553 1942">Gender: Both</p>                                                                                                                                                                                                                                                                                                                                                                                                                                                                                                                                                                        |

|                        |                                                                                                                                                                                                                                                                                                                                                                                                                                                                                                                                                                                                                                                                                                                  |
|------------------------|------------------------------------------------------------------------------------------------------------------------------------------------------------------------------------------------------------------------------------------------------------------------------------------------------------------------------------------------------------------------------------------------------------------------------------------------------------------------------------------------------------------------------------------------------------------------------------------------------------------------------------------------------------------------------------------------------------------|
|                        | <p>Number Enrolled: 44</p> <p>Study Design: Allocation: Randomized; Endpoint Classification: Safety Study; Intervention Model: Parallel Assignment; Masking: Double Blind (Subject, Caregiver); Primary Purpose: Treatment</p> <p>Start Date: November 2010</p> <p>Outcome Measures: Vascular function; Body fat percentage; inflammation biomarkers; cognitive function</p>                                                                                                                                                                                                                                                                                                                                     |
| Active, not recruiting | <p style="text-align: center;">Regulation of Intestinal and Hepatic Lipoprotein Secretion by Resveratrol</p> <p>Conditions: Dyslipidaemia; Insulin Resistance</p> <p>Intervention: Drug: Resveratrol</p> <p>Gender: Both</p> <p>Number Enrolled: 15</p> <p>Study Design: Allocation: Randomized; Endpoint Classification: Efficacy Study; Intervention Model: Crossover Assignment; Masking: Double Blind (Subject, Caregiver, Investigator, Outcomes Assessor); Primary Purpose: Basic Science</p> <p>Start Date: October 2011</p> <p>Outcome Measures: Examine the effect of resveratrol on ApoB 100 and ApoB 48 production in humans; Assess the change in insulin sensitivity with resveratrol treatment</p> |
| Active, not recruiting | <p style="text-align: center;">Randomized Trial of a Nutritional Supplement in Alzheimer's Disease</p> <p>Condition: Alzheimer's Disease</p> <p>Interventions: Dietary Supplement: Resveratrol with Glucose, and Malate; Dietary Supplement: Placebo</p> <p>Gender: Both</p> <p>Number Enrolled: 60</p> <p>Study Design: Allocation: Randomized; Endpoint Classification: Safety/Efficacy Study; Intervention Model: Parallel Assignment; Masking: Double Blind (Subject, Caregiver, Investigator, Outcomes Assessor); Primary Purpose: Treatment</p> <p>Start Date: January 2008</p> <p>Outcome Measures: Alzheimer Disease Assessment Scale (ADAScog); CGIC</p>                                                |
| Active, not recruiting | <p style="text-align: center;">Resveratrol in Postmenopausal Women With High Body Mass Index</p> <p>Condition: Healthy, no Evidence of Disease</p>                                                                                                                                                                                                                                                                                                                                                                                                                                                                                                                                                               |

|                        |                                                                                                                                                                                                                                                                                                                                                                                                                                                                                                                                                                                                                                                                                                                                                                                                                                                                               |
|------------------------|-------------------------------------------------------------------------------------------------------------------------------------------------------------------------------------------------------------------------------------------------------------------------------------------------------------------------------------------------------------------------------------------------------------------------------------------------------------------------------------------------------------------------------------------------------------------------------------------------------------------------------------------------------------------------------------------------------------------------------------------------------------------------------------------------------------------------------------------------------------------------------|
|                        | <p>Outcome Measures: Change in serum estradiol levels from baseline (BL) to post-intervention (PI) in postmenopausal women with high BMI; Change in other circulating sex-steroid hormones, including serum estrone, testosterone, and sex hormone-binding globulin (SHBG), from BL to PI; Change in serum levels of insulin and C-peptide from BL to PI; Change in adipocytokine expression and secretion, measured by serum leptin and adiponectin, from BL to PI; Change in inflammatory markers, measured by serum C-reactive protein, from BL to PI; Change in oxidative stress as measured by urinary 8-iso-PGF<math>2\alpha</math> and 8OHdG, from BL to PI; Safety of resveratrol intervention as measured by reported adverse events and changes in CBC/diff, blood chemistry, and lipids; Correlation between biomarker changes and systemic resveratrol levels</p> |
| Active, not recruiting | <p style="text-align: center;">Effects of Resveratrol Supplements on Vascular Health in Postmenopausal Women</p> <p>Condition: Cardiovascular Disease</p> <p>Interventions: Dietary Supplement: ResA; Dietary Supplement: Resveratrol; Dietary Supplement: Placebo</p> <p>Gender: Female</p> <p>Number Enrolled: 30</p> <p>Study Design: Allocation: Randomized; Endpoint Classification: Bio-availability Study; Intervention Model: Crossover Assignment; Masking: Double Blind (Subject, Investigator); Primary Purpose: Prevention</p> <p>Start Date: March 2012</p> <p>Outcome Measures: Bioavailability of a novel formulation of resveratrol (ResA) compared to a standard resveratrol supplement; Change in vascular function in response to ResA compared to native resveratrol; Change in platelet reactivity in response to ResA intake</p>                        |
| Recruiting             | <p style="text-align: center;">Dietary Polyphenols and Lipid Oxidation</p> <p>Condition: Obesity, Insulin Sensitivity, Type 2 Diabetes Mellitus</p> <p>Intervention: Dietary Supplement: Comparison of different combinations of polyphenols with respect to effects on fat oxidation</p> <p>Gender: Both</p> <p>Number Enrolled: 18</p> <p>Study Design: Allocation: Randomized; Intervention Model: Crossover Assignment; Masking: Double Blind (Subject, Investigator); Primary Purpose: Basic Science</p> <p>Start Date: February 2011</p> <p>Outcome Measure: postprandial fat oxidation</p>                                                                                                                                                                                                                                                                             |
| Recruiting             | <p style="text-align: center;">Influence of Caloric Restriction and Resveratrol in the Sirtuin System in Women and Men Aged 55 to 65 Years</p> <p>Conditions: Vascular System Injuries; Lipid Metabolism Disorders; Endothelial Dysfunction</p> <p>Interventions: Drug: Resveratrol; Behavioral: Caloric restriction</p> <p>Gender: Both</p> <p>Number Enrolled: 48</p> <p>Study Design: Allocation: Randomized; Endpoint Classification: Efficacy Study; Intervention Model: Parallel Assignment; Masking: Open Label; Primary Purpose: Prevention</p> <p>Start Date: August 2012</p> <p>Outcome Measures: Direct evaluation of the Sirtuin 1 levels; Influence of the Sirtuin 1 system on biomarkers and endothelial function.</p>                                                                                                                                          |
| Recruiting             | <p style="text-align: center;">Resveratrol for Alzheimer's Disease</p> <p>Condition: Alzheimer's Disease</p>                                                                                                                                                                                                                                                                                                                                                                                                                                                                                                                                                                                                                                                                                                                                                                  |



|            |                                                                                                                                                                                                                                                                                                                                                                                                                                                                                                                                                                                                                                                                                                                                                                                                                                                                                                                                                                                                                                                                                                                                                                                                                                             |
|------------|---------------------------------------------------------------------------------------------------------------------------------------------------------------------------------------------------------------------------------------------------------------------------------------------------------------------------------------------------------------------------------------------------------------------------------------------------------------------------------------------------------------------------------------------------------------------------------------------------------------------------------------------------------------------------------------------------------------------------------------------------------------------------------------------------------------------------------------------------------------------------------------------------------------------------------------------------------------------------------------------------------------------------------------------------------------------------------------------------------------------------------------------------------------------------------------------------------------------------------------------|
|            | <p>Interventions: Drug: Resveratrol; Drug: Placebo</p> <p>Gender: Both</p> <p>Number Enrolled: 120</p> <p>Study Design: Allocation: Randomized; Endpoint Classification: Safety/Efficacy Study; Intervention Model: Parallel Assignment; Masking: Double Blind (Subject, Caregiver, Investigator, Outcomes Assessor); Primary Purpose: Treatment</p> <p>Start Date: May 2012</p> <p>Outcome Measures: Rate of change over time on putative biomarkers of AD, particularly CSF total tau, CSF Abeta42, CSF Abeta40, and CSF phospho-tau181; Inter-arm differences in the assessment of the safety and tolerability of treatment with resveratrol; Change from baseline in volumetric magnetic resonance imaging (MRI); Change in Mini-Mental State Examination (MMSE); Change in Alzheimer's Disease Assessment Scale-Cognitive (ADAScog); Change in Alzheimer's Disease Cooperative Study-Activities of Daily Living (ADCS-ADL); Change in Clinical Dementia Rating Scale (CDR-SOB); Change in Neuropsychiatric Inventory (NPI); Comparison of the response to treatment of resveratrol based on ApoE genotype; Changes in cognition, mood, and AD CSF and imaging biomarkers associated with changes in insulin and glucose metabolism</p> |
| Recruiting | <p style="text-align: center;">Pilot Study of Resveratrol in Older Adults With Impaired Glucose Tolerance</p> <p>Condition: Impaired Glucose Tolerance</p> <p>Interventions: Dietary Supplement: resveratrol; Drug: Placebo</p> <p>Gender: Both</p> <p>Number Enrolled: 30</p> <p>Study Design: Allocation: Randomized; Intervention Model: Crossover Assignment; Masking: Double Blind (Subject, Investigator); Primary Purpose: Treatment</p> <p>Start Date: April 2011</p> <p>Outcome Measures: post meal glucose area under the curve; insulin sensitivity</p>                                                                                                                                                                                                                                                                                                                                                                                                                                                                                                                                                                                                                                                                          |
| Recruiting | <p style="text-align: center;">Long-term Investigation of Resveratrol in Obesity</p> <p>Conditions: Obesity; Inflammation; Insulin Sensitivity; Osteoporosis</p> <p>Intervention: Dietary Supplement: Resveratrol</p> <p>Gender: Male</p> <p>Number Enrolled: 72</p> <p>Study Design: Allocation: Randomized; Endpoint Classification: Efficacy Study; Intervention Model: Parallel Assignment; Masking: Double Blind (Subject, Caregiver, Investigator, Outcomes Assessor); Primary Purpose: Basic Science</p> <p>Start Date: August 2011</p> <p>Outcome Measure: Changes from Baseline in markers of inflammation (hs-CRP) in blood after 4 months of treatment with either resveratrol or placebo</p>                                                                                                                                                                                                                                                                                                                                                                                                                                                                                                                                    |
| Recruiting | <p style="text-align: center;">Long-term Investigation of Resveratrol on Fat Metabolism in Obese Men</p> <p>Conditions: Obesity; Non-alcoholic Fatty Liver Disease</p>                                                                                                                                                                                                                                                                                                                                                                                                                                                                                                                                                                                                                                                                                                                                                                                                                                                                                                                                                                                                                                                                      |

|            |                                                                                                                                                                                                                                                                                                                                                                                                                                                                                                                                                                                                                                                                                                                                                       |
|------------|-------------------------------------------------------------------------------------------------------------------------------------------------------------------------------------------------------------------------------------------------------------------------------------------------------------------------------------------------------------------------------------------------------------------------------------------------------------------------------------------------------------------------------------------------------------------------------------------------------------------------------------------------------------------------------------------------------------------------------------------------------|
|            | <p>Study Design: Allocation: Randomized; Endpoint Classification: Efficacy Study; Intervention Model: Parallel Assignment; Masking: Double Blind (Subject, Caregiver, Investigator, Outcomes Assessor); Primary Purpose: Basic Science</p> <p>Start Date: November 2011</p> <p>Outcome Measures: Hepatic VLDL-TG secretion and peripheral VLDL-TG clearance; Basal and insulin stimulated FFA and glucose turnover; VLDL-TG oxidation; Body composition (fat mass, fat-free mass, percent fat, visceral fat mass); LPL-activity and fat cell size in abdominal and femoral adipose tissue biopsy; Baseline data</p>                                                                                                                                   |
| Recruiting | <p style="text-align: center;">Resveratrol and Serum Apo A-I</p> <p>Condition: Dyslipidemia</p> <p>Intervention: Dietary Supplement: Resveratrol capsules</p> <p>Gender: Both</p> <p>Number Enrolled: 50</p> <p>Study Design: Allocation: Randomized; Intervention Model: Crossover Assignment; Masking: Double Blind (Subject, Investigator, Outcomes Assessor); Primary Purpose: Basic Science</p> <p>Start Date: January 2011</p> <p>Outcome Measures: ApoA-I level; Endothelial function and arterial stiffness; Endothelial function of the retinal microvasculature; Lipid and glucose metabolism during the fasting and postprandial phase; biomarkers for low-grade systemic inflammation and endothelial function</p>                        |
| Recruiting | <p style="text-align: center;">Resveratrol and Type 2 Diabetes</p> <p>Condition: Type 2 Diabetes</p> <p>Interventions: Dietary Supplement: placebo; Dietary Supplement: resveratrol</p> <p>Gender: Male</p> <p>Number Enrolled: 24</p> <p>Study Design: Allocation: Randomized; Endpoint Classification: Safety/Efficacy Study; Intervention Model: Crossover Assignment; Masking: Double Blind (Subject, Caregiver, Investigator, Outcomes Assessor); Primary Purpose: Treatment</p> <p>Start Date: May 2012</p> <p>Outcome Measures: insulin sensitivity (overall, muscle- and liver specific); muscle mitochondrial oxidative capacity; intramyocellular lipid content; intrahepatic lipid content; intracardiac lipid content; heart function</p> |
| Recruiting | <p style="text-align: center;">Resveratrol-Leucine Metabolite Synergy in Pre-diabetes</p> <p>Condition: Impaired Glucose Tolerance</p> <p>Interventions: Dietary Supplement: Resveratrol; Dietary Supplement: resveratrol /HMB; Other: Placebo treatment</p> <p>Gender: Both</p> <p>Number Enrolled: 36</p> <p>Study Design: Allocation: Randomized; Endpoint Classification: Efficacy Study; Intervention Model: Parallel Assignment; Masking: Double Blind (Subject, Investigator); Primary Purpose: Treatment</p> <p>Start Date: February 2012</p> <p>Outcome Measures: Glucose Control; Metabolic Markers</p>                                                                                                                                     |
| Recruiting | <p style="text-align: center;">Resveratrol in Patients With Non-alcoholic Fatty Liver Disease</p>                                                                                                                                                                                                                                                                                                                                                                                                                                                                                                                                                                                                                                                     |

|            |                                                                                                                                                                                                                                                                                                                                                                                                                                                                                                                                                                                                                                                                                                                                                                                                                                                                                                                                                                                            |
|------------|--------------------------------------------------------------------------------------------------------------------------------------------------------------------------------------------------------------------------------------------------------------------------------------------------------------------------------------------------------------------------------------------------------------------------------------------------------------------------------------------------------------------------------------------------------------------------------------------------------------------------------------------------------------------------------------------------------------------------------------------------------------------------------------------------------------------------------------------------------------------------------------------------------------------------------------------------------------------------------------------|
|            | <p>Condition: Fatty Liver</p> <p>Interventions: Dietary Supplement: Resveratrol; Dietary Supplement: Placebo</p> <p>Gender: Both</p> <p>Number Enrolled: 48</p> <p>Study Design: Allocation: Randomized; Endpoint Classification: Safety/Efficacy Study; Intervention Model: Parallel Assignment; Masking: Double Blind (Subject, Caregiver, Investigator, Outcomes Assessor); Primary Purpose: Treatment</p> <p>Start Date: September 2011</p> <p>Outcome Measures: Change in hepatic steatosis and inflammation; Assessment of tolerability and side-effects</p>                                                                                                                                                                                                                                                                                                                                                                                                                         |
| Recruiting | <p style="text-align: center;">Effect of resVida on Liver Fat Content</p> <p>Condition: Elevated Liver Fat Content and Insulin Resistance</p> <p>Interventions: Dietary Supplement: resveratrol; Dietary Supplement: Placebo</p> <p>Gender: Both</p> <p>Number Enrolled: 100</p> <p>Study Design: Allocation: Randomized; Endpoint Classification: Efficacy Study; Intervention Model: Parallel Assignment; Masking: Double Blind (Subject, Caregiver, Investigator, Outcomes Assessor); Primary Purpose: Prevention</p> <p>Start Date: June 2012</p> <p>Outcome Measures: Liver fat content; Body composition; Insulin sensitivity; Intima-media thickness; Blood analytes; Cardiorespiratory fitness</p>                                                                                                                                                                                                                                                                                 |
| Recruiting | <p style="text-align: center;">The Effects of Red Wine Polyphenols on Microvascular Dysfunction</p> <p>Condition: Obesity</p> <p>Interventions: Dietary Supplement: Red Wine Polyphenols 600 mg/day; Dietary Supplement: placebo</p> <p>Gender: Both</p> <p>Number Enrolled: 60</p> <p>Study Design: Allocation: Randomized; Endpoint Classification: Efficacy Study; Intervention Model: Parallel Assignment; Masking: Double Blind (Subject, Caregiver, Investigator, Outcomes Assessor); Primary Purpose: Treatment</p> <p>Start Date:</p> <p>Outcome Measures: Insulin sensitivity as determined by euglycemic clamp tests; Molecular mechanisms in muscle tissue; Biomarkers such as lipoproteins, adipocytokines, and markers of systemic inflammation; Glucose tolerance as assessed by the area under the curve for glucose (AUC<sub>gluc</sub>) during a standardized meal test; microvascular function (baseline and during hyperglycemia); Blood pressure 24 hr measurement</p> |
| Recruiting | <p style="text-align: center;">Effects of Dietary Interventions on the Brain in Mild Cognitive Impairment (MCI)</p> <p>Condition: Mild Cognitive Impairment</p>                                                                                                                                                                                                                                                                                                                                                                                                                                                                                                                                                                                                                                                                                                                                                                                                                            |

|            |                                                                                                                                                                                                                                                                                                                                                                                                                                                                                                                                                                                                                                                                                                                                                                                                                                                                                                                                                                                                                                                                                                                                                                                                                                                                  |
|------------|------------------------------------------------------------------------------------------------------------------------------------------------------------------------------------------------------------------------------------------------------------------------------------------------------------------------------------------------------------------------------------------------------------------------------------------------------------------------------------------------------------------------------------------------------------------------------------------------------------------------------------------------------------------------------------------------------------------------------------------------------------------------------------------------------------------------------------------------------------------------------------------------------------------------------------------------------------------------------------------------------------------------------------------------------------------------------------------------------------------------------------------------------------------------------------------------------------------------------------------------------------------|
|            | <p>Start Date: August 2010</p> <p>Outcome Measures: Alzheimer's Disease Assessment Scale - cognitive subscale; Functional/Structural brain changes; Plasma biomarkers</p>                                                                                                                                                                                                                                                                                                                                                                                                                                                                                                                                                                                                                                                                                                                                                                                                                                                                                                                                                                                                                                                                                        |
| Recruiting | <p>Evaluation of Oral Lipid Ingestion in Relation to Ovarian Androgen Secretion in Polycystic Ovary Syndrome (PCOS)</p> <p>Condition: Polycystic Ovary Syndrome</p> <p>Intervention: Drug: Salsalate and resveratrol</p> <p>Gender: Female</p> <p>Number Enrolled: 60</p> <p>Study Design: Allocation: Non-Randomized; Intervention Model: Parallel Assignment; Masking: Open Label; Primary Purpose: Basic Science</p> <p>Start Date: February 2012</p> <p>Outcome Measures: White blood cell nuclear factor kappa B (NFkappaB) activation in response to oral lipid ingestion and ovarian androgen secretion in response to human chorionic gonadotropin (HCG) stimulation.; White blood cell NFkappaB activation following oral lipid ingestion in response to 12 weeks of salsalate or PCE administration.; Ovarian androgen secretion following HCG administration in response to 12 weeks of salsalate or PCE administration.; Body composition status measured by DEXA in response to 12 weeks of salsalate or PCE administration.; Insulin sensitivity derived from an OGTT in response to 12 weeks of salsalate or PCE administration.; Ovulation rates documented by serum progesterone in response to 12 weeks of salsalate or PCE administration</p> |
| Recruiting | <p>Effects of Dietary Interventions on the Aging Brain</p> <p>Condition: Healthy</p> <p>Interventions: Behavioral: Caloric restriction; Dietary Supplement: Omega-3 (fish oil capsules); Dietary Supplement: Placebo; Dietary Supplement: Resveratrol</p> <p>Gender: Both</p> <p>Number Enrolled: 300</p> <p>Study Design: Allocation: Randomized; Endpoint Classification: Efficacy Study; Intervention Model: Parallel Assignment; Masking: Single Blind (Investigator); Primary Purpose: Prevention</p> <p>Start Date: November 2009</p> <p>Outcome Measures: Auditory verbal Learning Task; Functional/Structural brain changes; Plasma biomarkers</p>                                                                                                                                                                                                                                                                                                                                                                                                                                                                                                                                                                                                       |
| Recruiting | <p>Resveratrol in Type2 Diabetes and Obesity</p> <p>Conditions: Type 2 Diabetes; Obesity; Insulin Resistance</p> <p>Interventions: Drug: Placebo; Drug: Resveratrol 40 mg oral three times a day; Drug: Resveratrol 500 mg oral once daily.</p> <p>Gender: Both</p> <p>Number Enrolled: 102</p> <p>Study Design: Allocation: Randomized; Endpoint Classification: Efficacy Study; Intervention Model: Parallel Assignment; Masking: Single Blind (Subject); Primary Purpose: Treatment</p> <p>Start Date: December 2008</p> <p>Outcome Measures: NF-Kb; GLP-1</p>                                                                                                                                                                                                                                                                                                                                                                                                                                                                                                                                                                                                                                                                                                |
| Recruiting | <p>Effect of Resveratrol on Age-related Insulin Resistance and Inflammation in Humans</p>                                                                                                                                                                                                                                                                                                                                                                                                                                                                                                                                                                                                                                                                                                                                                                                                                                                                                                                                                                                                                                                                                                                                                                        |

|            |                                                                                                                                                                                                                                                                                                                                                                                                                                                                                                                                                                                                                                                                                                                                                                                                                                                                                                                                                                                                                                                                                                                                                                                                                                                                                                                                                                                                                                                                                                                                                                                                                                           |
|------------|-------------------------------------------------------------------------------------------------------------------------------------------------------------------------------------------------------------------------------------------------------------------------------------------------------------------------------------------------------------------------------------------------------------------------------------------------------------------------------------------------------------------------------------------------------------------------------------------------------------------------------------------------------------------------------------------------------------------------------------------------------------------------------------------------------------------------------------------------------------------------------------------------------------------------------------------------------------------------------------------------------------------------------------------------------------------------------------------------------------------------------------------------------------------------------------------------------------------------------------------------------------------------------------------------------------------------------------------------------------------------------------------------------------------------------------------------------------------------------------------------------------------------------------------------------------------------------------------------------------------------------------------|
|            | <p>Conditions: Type 2 Diabetes Mellitus; Insulin Resistance</p> <p>Intervention: Drug: Resveratrol</p> <p>Gender: Both</p> <p>Number Enrolled: 80</p> <p>Study Design: Endpoint Classification: Efficacy Study; Intervention Model: Single Group Assignment; Masking: Open Label; Primary Purpose: Treatment</p> <p>Start Date: March 2008</p> <p>Outcome Measures: Peripheral Insulin Sensitivity; Hepatic insulin sensitivity; Muscle mitochondrial function; Inflammatory and Anti-inflammatory Markers in adipose tissue; Neuropsychological assessment</p>                                                                                                                                                                                                                                                                                                                                                                                                                                                                                                                                                                                                                                                                                                                                                                                                                                                                                                                                                                                                                                                                           |
| Recruiting | <p>A Biological Study of Resveratrol's Effects on Notch-1 Signaling in Subjects With Low Grade Gastrointestinal Tumors</p> <p>Condition: Neuroendocrine Tumor</p> <p>Intervention: Dietary Supplement: Resveratrol</p> <p>Gender: Both</p> <p>Number Enrolled: 7</p> <p>Study Design: Endpoint Classification: Safety/Efficacy Study; Intervention Model: Single Group Assignment; Masking: Open Label; Primary Purpose: Treatment</p> <p>Start Date: December 2011</p> <p>Outcome Measures: Notch1 activation in post-treatment tumor biopsy specimens when compared to pretreatment levels; Demonstrate that resveratrol at 5 gm per day will be well tolerated with minimal dose limiting toxicities in this patient population.; Describe the effect of resveratrol on tumor growth as demonstrated by standard cross sectional imaging and tumor markers.</p>                                                                                                                                                                                                                                                                                                                                                                                                                                                                                                                                                                                                                                                                                                                                                                        |
| Completed  | <p>Resveratrol-enriched Grape Extract (Stilvid) in Primary and Secondary Prevention of Cardiovascular Disease</p> <p>Condition: Cardiovascular Diseases</p> <p>Interventions: Dietary Supplement: Placebo in primary cardiovascular prevention (PP); Dietary Supplement: Placebo in secondary prevention; Dietary Supplement: Grape extract in primary prevention (PP); Dietary Supplement: Grape extract in SP; Dietary Supplement: Resveratrol-enriched grape extract in PP; Dietary Supplement: Resveratrol-enriched grape extract in SP</p> <p>Gender: Both</p> <p>Number Enrolled: 150</p> <p>Study Design: Allocation: Randomized; Endpoint Classification: Safety/Efficacy Study; Intervention Model: Parallel Assignment; Masking: Double Blind (Subject, Caregiver, Investigator, Outcomes Assessor); Primary Purpose: Prevention</p> <p>Start Date: April 2009</p> <p>Outcome Measures: Apolipoprotein-B; oxidized LDL particles; Plasminogen activator inhibitor type 1 (PAI-1); Adiponectin; C Reactive Protein; Interleukin-6; Interleukin-10; Interleukin-18; sICAM-1; sVCAM-1; D-dimer; Fibrinogen; Glycated hemoglobin; Glucose; GGT; AST; Urate; ALT; LDH; TSH; Thyroxine; ALP; CPK; Bilirubin; Creatinin; Albumin; Total cholesterol; LDL-cholesterol; HDL-cholesterol; Triglycerides; Hematocrit; Hemoglobin; Mean corpuscular volume; Leucocytes; Neutrophils; Lymphocytes; Eosinophils; Platelets; Mean platelet volume; Sedimentation rate volume; Gene expression profile in peripheral blood mononuclear cells (PBMNCs); Total homocystein levels; Measurement of atheroma plaque and carotid intim thickness</p> |
| Completed  | <p>Effects of Resveratrol in Patients With Type 2 Diabetes</p> <p>Condition: Type 2 Diabetes</p>                                                                                                                                                                                                                                                                                                                                                                                                                                                                                                                                                                                                                                                                                                                                                                                                                                                                                                                                                                                                                                                                                                                                                                                                                                                                                                                                                                                                                                                                                                                                          |

|           |                                                                                                                                                                                                                                                                                                                                                                                                                                                                                                                                                                                                                                                                                                                                                                                                                                                                |
|-----------|----------------------------------------------------------------------------------------------------------------------------------------------------------------------------------------------------------------------------------------------------------------------------------------------------------------------------------------------------------------------------------------------------------------------------------------------------------------------------------------------------------------------------------------------------------------------------------------------------------------------------------------------------------------------------------------------------------------------------------------------------------------------------------------------------------------------------------------------------------------|
|           | <p>Gender: Male</p> <p>Number Enrolled: 10</p> <p>Study Design: Allocation: Randomized; Endpoint Classification: Pharmacokinetics/Dynamics Study; Intervention Model: Parallel Assignment; Masking: Double Blind (Subject, Caregiver, Investigator, Outcomes Assessor); Primary Purpose: Basic Science</p> <p>Start Date: December 2008</p> <p>Outcome Measures: Skeletal muscle sirtuin 1 (SIRT1) expression; Skeletal muscle 5'-AMP-activated protein kinase (AMPK) expression; Skeletal muscle phosphorylated-AMPK-Thr172 (p-AMPK) expression; Skeletal muscle glucose transporter type 4 (GLUT 4) expression; Glycated hemoglobin (HbA1c); Body weight; Insulin sensitivity; Lipid profile; Energy expenditure; Physical activity level; Abdominal adipose tissue distribution; Skeletal muscle fibre type composition; Renal function; Liver function</p> |
| Completed | <p style="text-align: center;">Resveratrol and Midazolam Metabolism</p> <p>Condition: Healthy</p> <p>Interventions: Drug: Midazolam; Dietary Supplement: resveratrol (single dose); Dietary Supplement: resveratrol (multiple dose)</p> <p>Gender: Both</p> <p>Number Enrolled: 6</p> <p>Study Design: Allocation: Non-Randomized; Endpoint Classification: Pharmacokinetics Study; Intervention Model: Parallel Assignment; Masking: Open Label; Primary Purpose: Basic Science</p> <p>Start Date: July 2010</p> <p>Outcome Measures: Inhibition of midazolam clearance; Resveratrol accumulation</p>                                                                                                                                                                                                                                                         |
| Completed | <p style="text-align: center;">The Cognitive and Cerebral Blood Flow Effects of Resveratrol</p> <p>Condition: Cognitive and Cerebral Blood Flow Effects of Resveratrol</p> <p>Interventions: Dietary Supplement: Trans- resveratrol; Other: Placebo (silica)</p> <p>Gender: Both</p> <p>Number Enrolled: 24</p> <p>Study Design: Allocation: Randomized; Endpoint Classification: Efficacy Study; Intervention Model: Crossover Assignment; Masking: Double Blind (Investigator, Outcomes Assessor); Primary Purpose: Basic Science</p> <p>Start Date: June 2008</p> <p>Outcome Measures: Modulation of Levels of Total Haemoglobin; Modulation of Deoxygenated Levels of Haemoglobin; Number of Participants With Significant Modulation of Cognitive Performance</p>                                                                                         |
| Completed | <p style="text-align: center;">Resveratrol for Patients With Colon Cancer</p> <p>Conditions: Colon Cancer; Cancer</p>                                                                                                                                                                                                                                                                                                                                                                                                                                                                                                                                                                                                                                                                                                                                          |

|           |                                                                                                                                                                                                                                                                                                                                                                                                                                                                                                                                                                                                                                                                                                                                                                                                                                                                       |
|-----------|-----------------------------------------------------------------------------------------------------------------------------------------------------------------------------------------------------------------------------------------------------------------------------------------------------------------------------------------------------------------------------------------------------------------------------------------------------------------------------------------------------------------------------------------------------------------------------------------------------------------------------------------------------------------------------------------------------------------------------------------------------------------------------------------------------------------------------------------------------------------------|
|           | Outcome Measure: Test the hypothesis that resveratrol modulates Wnt signaling <i>in vivo</i> in colon cancer and normal colonic mucosa                                                                                                                                                                                                                                                                                                                                                                                                                                                                                                                                                                                                                                                                                                                                |
| Completed | <p style="text-align: center;">Anti-inflammatory and Antioxidant Effects of Resveratrol on Healthy Adults.</p> <p>Conditions: Chronic Subclinic Inflammation; Redox Status</p> <p>Interventions: Dietary Supplement: Resveratrol; Dietary Supplement: resveratrol</p> <p>Gender: Both</p> <p>Number Enrolled: 40</p> <p>Study Design: Allocation: Randomized; Endpoint Classification: Efficacy Study; Intervention Model: Crossover Assignment; Masking: Double Blind (Subject, Caregiver); Primary Purpose: Prevention</p> <p>Start Date: July 2011</p> <p>Outcome Measures: C-reactive protein; TAS (total antioxidant status); 4-hydroxynonenal; nitrotyrosine; endothelial nitric oxide synthase (eNOS)-polymorphism; superoxide dismutase (SOD2)-polymorphism; catalase-polymorphism; interleukin-6; pentraxin 3; tumor necrosis factor-<math>\alpha</math></p> |
| Completed | <p style="text-align: center;">Pilot Study Of The Effects Of Resveratrol On Endothelial Function In Subjects With Type 2 Diabetes Mellitus</p> <p>Condition: Type 2 Diabetes Mellitus</p> <p>Intervention: Dietary Supplement: Resveratrol</p> <p>Gender: Both</p> <p>Number Enrolled: 20</p> <p>Study Design: Allocation: Non-Randomized; Intervention Model: Single Group Assignment; Masking: Open Label; Primary Purpose: Basic Science</p> <p>Start Date: January 2010</p> <p>Outcome Measures: Brachial artery flow-mediated dilation; Blood markers of inflammation, oxidative stress, insulin resistance</p>                                                                                                                                                                                                                                                  |
| Completed | <p style="text-align: center;">Cerebral Blood Flow Effects of Resveratrol and Piperine in Humans</p> <p>Condition: Healthy</p> <p>Interventions: Dietary Supplement: Trans- resveratrol; Other: Placebo (silica)</p> <p>Gender: Both</p> <p>Number Enrolled: 23</p> <p>Study Design: Allocation: Randomized; Endpoint Classification: Efficacy Study; Intervention Model: Factorial Assignment; Masking: Double Blind (Subject, Investigator)</p> <p>Start Date: April 2010</p> <p>Outcome Measures: Modulation of levels of total haemoglobin; Modulation of levels of deoxygenated haemoglobin; Modulation of levels of oxygenated haemoglobin; Number of participants displaying significant modulation of cognitive performance</p>                                                                                                                               |
| Completed | <p style="text-align: center;">Use of Resveratrol to Decrease Acute Secondary Brain Injury Following Sports-Related Concussions in Boxers</p> <p>Condition: Sports Concussion</p>                                                                                                                                                                                                                                                                                                                                                                                                                                                                                                                                                                                                                                                                                     |

|           |                                                                                                                                                                                                                                                                                                                                                                                                                                                                                                                                                                                                                                                                                                                                                                                                                                                                                                                                                                                                                 |
|-----------|-----------------------------------------------------------------------------------------------------------------------------------------------------------------------------------------------------------------------------------------------------------------------------------------------------------------------------------------------------------------------------------------------------------------------------------------------------------------------------------------------------------------------------------------------------------------------------------------------------------------------------------------------------------------------------------------------------------------------------------------------------------------------------------------------------------------------------------------------------------------------------------------------------------------------------------------------------------------------------------------------------------------|
|           | <p>Number Enrolled: 12</p> <p>Study Design: Allocation: Randomized; Endpoint Classification: Safety/Efficacy Study; Intervention Model: Parallel Assignment; Masking: Double Blind (Subject, Investigator, Outcomes Assessor); Primary Purpose: Treatment</p> <p>Start Date: March 2011</p> <p>Outcome Measures: To determine the number of adverse events that may be associated with the use of resveratrol in this population.; Cognitive Outcomes; Axonal Injury</p>                                                                                                                                                                                                                                                                                                                                                                                                                                                                                                                                        |
| Completed | <p style="text-align: center;">A Clinical Study to Assess the Safety, Pharmacokinetics, and Pharmacodynamics of SRT501 in Subjects With Colorectal Cancer and Hepatic Metastases</p> <p>Conditions: Neoplasms, Colorectal; Colorectal Cancer</p> <p>Interventions: Drug: Placebo; Drug: SRT501</p> <p>Gender: Both</p> <p>Number Enrolled: 9</p> <p>Study Design: Allocation: Randomized; Endpoint Classification: Pharmacokinetics/Dynamics Study; Intervention Model: Parallel Assignment; Masking: Double Blind (Subject, Caregiver, Investigator); Primary Purpose: Basic Science</p> <p>Start Date: August 2008</p> <p>Outcome Measures: To determine the safety and tolerability of SRT501 when administered once daily for 14 days.; To characterize the pharmacokinetic profile of SRT501 in blood and normal and malignant metastatic tissues when administered once daily for 14 days.; To examine the pharmacodynamics of SRT501 activity in both normal and malignant tissue samples and blood.</p> |
| Completed | <p style="text-align: center;">Resveratrol Supplementation on Exercise in Healthy Sedentary Adults</p> <p>Condition: Sedentary Lifestyle</p> <p>Interventions: Drug: Resveratrol; Drug: placebo</p> <p>Gender: Both</p> <p>Number Enrolled: 13</p> <p>Study Design: Allocation: Randomized; Intervention Model: Crossover Assignment; Masking: Double Blind (Subject, Caregiver, Investigator, Outcomes Assessor); Primary Purpose: Basic Science</p> <p>Start Date: February 2009</p> <p>Outcome Measures: Change from baseline in duration of constant load exercise; Change from baseline in aerobic capacity(peak VO2); Number of participants with Adverse Events</p>                                                                                                                                                                                                                                                                                                                                      |
| Completed | <p style="text-align: center;">Resveratrol in Healthy Adult Participants</p> <p>Condition: Melanoma (Skin)</p>                                                                                                                                                                                                                                                                                                                                                                                                                                                                                                                                                                                                                                                                                                                                                                                                                                                                                                  |



|           |                                                                                                                                                                                                                                                                                                                                                                                                                                                                                                                                                                                                                                                                                                                                                                                                                                                                                                                                      |
|-----------|--------------------------------------------------------------------------------------------------------------------------------------------------------------------------------------------------------------------------------------------------------------------------------------------------------------------------------------------------------------------------------------------------------------------------------------------------------------------------------------------------------------------------------------------------------------------------------------------------------------------------------------------------------------------------------------------------------------------------------------------------------------------------------------------------------------------------------------------------------------------------------------------------------------------------------------|
|           | <p>pi levels in blood lymphocytes and serum bilirubin level from baseline to end of resveratrol intervention; Safety as measured by assessing the frequency and severity of adverse events, blood chemistry, and hematology</p>                                                                                                                                                                                                                                                                                                                                                                                                                                                                                                                                                                                                                                                                                                      |
| Completed | <p style="text-align: center;">Potential Beneficial Effects of Resveratrol</p> <p>Conditions: Metabolic Syndrome; Obesity</p> <p>Interventions: Dietary Supplement: Resveratrol; Other: Placebo</p> <p>Gender: Male</p> <p>Number Enrolled: 24</p> <p>Study Design: Allocation: Randomized; Endpoint Classification: Efficacy Study; Intervention Model: Parallel Assignment; Masking: Double Blind (Subject, Caregiver, Investigator); Primary Purpose: Basic Science</p> <p>Start Date: October 2010</p> <p>Outcome Measures: Metabolic parameters; Pathways of substrate metabolism.</p>                                                                                                                                                                                                                                                                                                                                          |
| Completed | <p style="text-align: center;">Chronic Resveratrol Supplementation in Healthy Humans</p> <p>Condition: Healthy</p> <p>Interventions: Dietary Supplement: Resveratrol; Other: Placebo</p> <p>Gender: Both</p> <p>Number Enrolled: 60</p> <p>Study Design: Allocation: Randomized; Endpoint Classification: Efficacy Study; Intervention Model: Parallel Assignment; Masking: Double Blind (Subject, Investigator); Primary Purpose: Basic Science</p> <p>Start Date: February 2011</p> <p>Outcome Measures: Chronic modulation of cerebral blood flow; Number of participants with modulated mood; Number of participants with modulated cognitive performance; Number of participants with significant modulation of sleep; Number of participants with significant modulation of health; Number of participants with significant modulation of blood pressure; Number of participants with significant modulation of CBF in MCA</p> |
| Completed | <p style="text-align: center;">Resveratrol in Treating Patients With Colorectal Cancer That Can Be Removed By Surgery</p> <p>Condition: Colorectal Cancer</p> <p>Interventions: Drug: resveratrol; Other: immunohistochemistry staining method; Other: immunologic technique; Other: laboratory biomarker analysis; Other: pharmacological study; Procedure: biopsy; Procedure: endoscopic biopsy; Procedure: neoadjuvant therapy</p> <p>Gender: Both</p> <p>Number Enrolled: 20</p> <p>Study Design: Allocation: Non-Randomized; Masking: Open Label; Primary Purpose: Treatment</p> <p>Start Date: December 2006</p> <p>Outcome Measure: Concentration of MIG</p>                                                                                                                                                                                                                                                                  |
| Completed | <p style="text-align: center;">UMCC 2003-064 Resveratrol in Preventing Cancer in Healthy Participants</p> <p>Condition: Unspecified Adult Solid Tumor, Protocol Specific</p>                                                                                                                                                                                                                                                                                                                                                                                                                                                                                                                                                                                                                                                                                                                                                         |

|           |                                                                                                                                                                                                                                                                                                                                                                                                                                                                                                                                                                                                                                                                                                                                                                                                                                                                                                                                                                                                              |
|-----------|--------------------------------------------------------------------------------------------------------------------------------------------------------------------------------------------------------------------------------------------------------------------------------------------------------------------------------------------------------------------------------------------------------------------------------------------------------------------------------------------------------------------------------------------------------------------------------------------------------------------------------------------------------------------------------------------------------------------------------------------------------------------------------------------------------------------------------------------------------------------------------------------------------------------------------------------------------------------------------------------------------------|
|           | <p>Number Enrolled: 40</p> <p>Study Design: Masking: Open Label; Primary Purpose: Prevention</p> <p>Start Date: September 2004</p> <p>Outcome Measure:</p>                                                                                                                                                                                                                                                                                                                                                                                                                                                                                                                                                                                                                                                                                                                                                                                                                                                   |
| Completed | <p style="text-align: center;">Effect of resVida, a Comparison With Calorie Restriction Regimen</p> <p>Conditions: Obesity; Metabolic Syndrome; Diabetes; Aging</p> <p>Interventions: Dietary Supplement: resveratrol; Other: placebo; Behavioral: Calorie Restriction</p> <p>Gender: Female</p> <p>Number Enrolled: 49</p> <p>Study Design: Allocation: Randomized; Endpoint Classification: Safety/Efficacy Study; Intervention Model: Parallel Assignment; Masking: Double Blind (Subject, Caregiver, Investigator); Primary Purpose: Prevention</p> <p>Start Date: January 2009</p> <p>Outcome Measures: global skeletal muscle gene expression profile; insulin sensitivity; intrahepatic triglyceride content, body composition; blood lipid levels, markers of inflammation and plasma hormones; safety and tolerability</p>                                                                                                                                                                          |
| Completed | <p style="text-align: center;">resVida and Fat Oxidation</p> <p>Condition: Obesity</p> <p>Interventions: Dietary Supplement: resVida; Dietary Supplement: placebo</p> <p>Gender: Male</p> <p>Number Enrolled: 18</p> <p>Study Design: Allocation: Randomized; Endpoint Classification: Safety/Efficacy Study; Intervention Model: Crossover Assignment; Masking: Double Blind (Subject, Investigator); Primary Purpose: Treatment</p> <p>Start Date: October 2009</p> <p>Outcome Measures: difference in fat oxidation between resVida and placebo treated group; difference in mitochondrial biogenesis, function, and lipolysis in adipose and skeletal muscle tissue between resVida and placebo treated group</p>                                                                                                                                                                                                                                                                                        |
| Completed | <p style="text-align: center;">Bioavailability Study of Different Dietary Antioxidants in Volunteers</p> <p>Condition: Cardiovascular Disease</p> <p>Intervention:</p> <p>Gender: Both</p> <p>Number Enrolled: 90</p> <p>Study Design:</p> <p>Start Date: September 2009</p> <p>Outcome Measures: AUC<sub>t</sub> - Area under the serum concentration-time curve from the first time point [t=0] to the time point of the last measured concentration [t(last)]; AUC<sub>∞</sub> - Area under the serum concentration-time curve from the time point [t=0] to infinity [∞]; C<sub>max</sub> - Maximum serum concentration; t<sub>max</sub> - Time of maximum serum concentration; t<sub>1/2</sub> - Elimination half life; AUC(last)-∞ - Difference between AUC<sub>∞</sub> and AUC<sub>t</sub> expressed as percentage value; AUC<sub>t</sub>/AUC<sub>∞</sub> - calculated as quotient of AUC<sub>t</sub> and AUC<sub>∞</sub>; f = C<sub>max</sub>/ AUC<sub>t</sub> (indication of rate of absorption)</p> |
| Completed | <p style="text-align: center;">Effects of Peanut and Peanut Butter Consumption on Blood Lipids and Glycemic Control in Adults With Type 2 Diabetes</p>                                                                                                                                                                                                                                                                                                                                                                                                                                                                                                                                                                                                                                                                                                                                                                                                                                                       |

|           |                                                                                                                                                                                                                                                                                                                                                                                                                                                                                                                                                                                                                                                                                                                                                                                                                                                                                                                                                                                                                                                                                                                                                                                                                                                                                             |
|-----------|---------------------------------------------------------------------------------------------------------------------------------------------------------------------------------------------------------------------------------------------------------------------------------------------------------------------------------------------------------------------------------------------------------------------------------------------------------------------------------------------------------------------------------------------------------------------------------------------------------------------------------------------------------------------------------------------------------------------------------------------------------------------------------------------------------------------------------------------------------------------------------------------------------------------------------------------------------------------------------------------------------------------------------------------------------------------------------------------------------------------------------------------------------------------------------------------------------------------------------------------------------------------------------------------|
|           | <p>Condition: Type 2 Diabetes</p> <p>Intervention: Dietary Supplement: Peanuts and peanut butter</p> <p>Gender: Both</p> <p>Number Enrolled: 60</p> <p>Study Design: Allocation: Randomized; Intervention Model: Parallel Assignment; Masking: Single Blind (Outcomes Assessor); Primary Purpose: Treatment</p> <p>Start Date: June 2009</p> <p>Outcome Measures: The primary outcome measure is HDL-C; Serum lipids, glucose, HbA1c, anthropometrics and blood pressure</p>                                                                                                                                                                                                                                                                                                                                                                                                                                                                                                                                                                                                                                                                                                                                                                                                                |
| Unknown † | <p>Pilot Study of the Effects of Resveratrol Supplement in Mild-to-Moderate Alzheimer's Disease</p> <p>Condition: Alzheimer Disease</p> <p>Interventions: Dietary Supplement: Longevinex brand resveratrol supplement; Dietary Supplement: placebo</p> <p>Gender: Both</p> <p>Number Enrolled: 50</p> <p>Study Design: Allocation: Randomized; Endpoint Classification: Efficacy Study; Intervention Model: Parallel Assignment; Masking: Double Blind (Subject, Caregiver, Investigator, Outcomes Assessor); Primary Purpose: Treatment</p> <p>Start Date: September 2008</p> <p>Outcome Measures: cognition; function; behavior</p>                                                                                                                                                                                                                                                                                                                                                                                                                                                                                                                                                                                                                                                       |
| Unknown † | <p>Phase I Biomarker Study of Dietary Grape-Derived Low Dose Resveratrol for Colon Cancer Prevention</p> <p>Condition: Colon Cancer</p> <p>Intervention: Dietary Supplement: grapes</p> <p>Gender: Both</p> <p>Number Enrolled: 30</p> <p>Study Design: Allocation: Randomized; Intervention Model: Parallel Assignment; Masking: Open Label; Primary Purpose: Prevention</p> <p>Start Date: January 2008</p> <p>Outcome Measures: Expression and cellular localization of beta-catenin in intestinal mucosa; localization of <math>\beta</math>-catenin. Expression of Wnt pathway target genes in intestinal mucosa; Wnt target gene expression; Define whether grape supplemented diet affects colonic mucosa cell proliferation. Ki67 staining method will be utilized on the pre- and post-resveratrol biopsy specimens.; Define any side-effects associated with the resveratrol-rich dietary program. Laboratory testing is performed at specified timepoints in this protocol, along with history &amp; physical, for the purposes of toxicity monitoring; Monitor resveratrol content of grapes throughout the course of the study. Grapes will be obtained from the same source as participants monthly throughout the study and the content of resveratrol will be measured.</p> |
| Unknown † | <p>Dietary Intervention in Follicular Lymphoma</p> <p>Condition: Follicular Lymphoma</p>                                                                                                                                                                                                                                                                                                                                                                                                                                                                                                                                                                                                                                                                                                                                                                                                                                                                                                                                                                                                                                                                                                                                                                                                    |

|           |                                                                                                                                                                                                                                                                                                                                                                                                                                                                                                                                                                                                                                                                                                                                                                                                                                                                                                                                                                                                                                                     |
|-----------|-----------------------------------------------------------------------------------------------------------------------------------------------------------------------------------------------------------------------------------------------------------------------------------------------------------------------------------------------------------------------------------------------------------------------------------------------------------------------------------------------------------------------------------------------------------------------------------------------------------------------------------------------------------------------------------------------------------------------------------------------------------------------------------------------------------------------------------------------------------------------------------------------------------------------------------------------------------------------------------------------------------------------------------------------------|
|           | <p>Study Design: Allocation: Non-Randomized; Endpoint Classification: Efficacy Study; Intervention Model: Single Group Assignment; Masking: Open Label; Primary Purpose: Treatment</p> <p>Start Date: April 2007</p> <p>Outcome Measures: Apoptosis an proliferation rate in tumor cells,; Levels of: proinflammatory cytokines,tumor immune cell infiltrate</p>                                                                                                                                                                                                                                                                                                                                                                                                                                                                                                                                                                                                                                                                                    |
| Unknown † | <p style="text-align: center;">Physiological Effects of Grape Seed Extract in Diastolic Heart Failure</p> <p>Conditions: Diastolic Heart Failure; Hypertensive Heart Disease; Heart Failure With Preserved Ejection Fraction; Hypertension; Oxidative Stress</p> <p>Intervention: Drug: grape seed extract (MegaNatural BP, Polyphenolics, Inc.)</p> <p>Gender: Both</p> <p>Number Enrolled: 25</p> <p>Study Design: Allocation: Randomized; Endpoint Classification: Safety/Efficacy Study; Intervention Model: Crossover Assignment; Masking: Double Blind (Subject, Caregiver, Investigator, Outcomes Assessor); Primary Purpose: Treatment</p> <p>Start Date: August 2010</p> <p>Outcome Measures: Brachial artery flow-mediated dilation (FMD); 24-hour blood pressure; EndoPAT arterial endothelial function; Carotid-femoral pulse wave velocity; Maximal exercise capacity and oxygen consumption; Resting and post-exercise ventricular systolic and diastolic function; Urinary 8-isoprostanes; Heart failure related quality of life</p> |
| Withdrawn | <p style="text-align: center;">Safety and Efficacy of a Dietary Supplement in Females With Cellulite</p> <p>Condition: Cellulite (Orange Peel Skin)</p> <p>Interventions: Dietary Supplement: dietary supplement for cellulite (PUFA, resveratrol, lycopene, beta carotene, lutein); Dietary Supplement: Viatmin E</p> <p>Gender: Female</p> <p>Number Enrolled: 8</p> <p>Study Design: Allocation: Randomized; Endpoint Classification: Safety/Efficacy Study; Intervention Model: Parallel Assignment; Masking: Double Blind (Subject, Investigator, Outcomes Assessor); Primary Purpose: Treatment</p> <p>Start Date: May 2011</p> <p>Outcome Measures: Clinical biochemistry (hematology, blood chemistry, blood coagulation); vital signs; adverse events and tolerability; cellulite severity; Thigh circumference; Digital photography; Ultrasound sonography; Magnetic resonance; satisfaction questionnaire; dermatology life quality index; celluquol questionnaire; cutometry; corneometry; skin profilometry; liquichip analysis</p>    |
| Withdrawn | <p style="text-align: center;">Mechanisms of Metabolic Regulation of Resveratrol on Humans With Metabolic Syndrome</p> <p>Condition: Insulin Resistance</p>                                                                                                                                                                                                                                                                                                                                                                                                                                                                                                                                                                                                                                                                                                                                                                                                                                                                                         |

|           |                                                                                                                                                                                                                                                                                                                                                                                                                                                                                                                                                                                                                                                                                                                                                                                                                                                                                     |
|-----------|-------------------------------------------------------------------------------------------------------------------------------------------------------------------------------------------------------------------------------------------------------------------------------------------------------------------------------------------------------------------------------------------------------------------------------------------------------------------------------------------------------------------------------------------------------------------------------------------------------------------------------------------------------------------------------------------------------------------------------------------------------------------------------------------------------------------------------------------------------------------------------------|
|           | tabolism (lower LDL, raise HDL and lower triglyceride (TG) levels); and 3) physical activity levels measured by pedometer and 7 day physical activity recall (PAR)                                                                                                                                                                                                                                                                                                                                                                                                                                                                                                                                                                                                                                                                                                                  |
| Withdrawn | <p>A Clinical Study to Assess the Safety and Activity of SRT501 Alone or in Combination With Bortezomib in Patients With Multiple Myeloma</p> <p>Condition: Multiple Myeloma</p> <p>Interventions: Drug: 5.0 g SRT501; Drug: Bortezomib</p> <p>Gender: Both</p> <p>Number Enrolled: 24</p> <p>Study Design: Endpoint Classification: Safety/Efficacy Study; Intervention Model: Single Group Assignment; Masking: Open Label; Primary Purpose: Treatment</p> <p>Start Date: March 2009</p> <p>Outcome Measures: Safety and tolerability of SRT501 with or without bortezomib administration.; Efficacy and response. Overall response rates will be calculated. Response will be defined as either a CR, PR, MR or SD after every two cycles of therapy.; Pharmacokinetics. Plasma samples will be collected from 15 subjects enrolled for SRT501 concentration during Cycle 1.</p> |

\*It should be noted that trial status is referred at the time of submission of the present review (October-2012). In addition, some sponsors do not update often the status of the trial.
